# Supplementary material
Source: PubMed Central journal article supplement (PMC6452688)
Supplement: pnas.1818400116.sapp.pdf [file pnas.1818400116.sapp.pdf]

# Supporting Information

## Changes in belowground biodiversity during ecosystem development

Manuel Delgado-Baquerizo, Richard D. Bardgett, Peter M. Vitousek, Fernando T. Maestre, Mark A. Williams, David J. Eldridge, Hans Lambers, Antonio Gallardo, Laura García-Velázquez, Osvaldo E. Sala, Sebastián R. Abades, Fernando D. Alfaro, Asmeret A. Berhe, Matthew A. Bowker, Courtney M. Currier, Nick A. Cutler, Stephen C. Hart, Patrick E. Hayes, Zeng-Yei Hseu, Martin Kirchmair, Sigrid Neuhauser, Victor M. Peña, Cecilia A. Pérez, Sasha C. Reed, Fernanda Santos, Christina Siebe, Benjamin W. Sullivan, Luis Weber-Grullon, Noah Fierer.

### **Author for correspondence:**

Manuel Delgado-Baquerizo. E-mail: [M.DelgadoBaquerizo@gmail.com](mailto:M.DelgadoBaquerizo@gmail.com)

### **This PDF file includes:**

Extended Discussion

Extended Acknowledgements

Material and Methods

Figures S1-S32

Tables S1-S15

## Extended discussion

**Belowground community composition.** Plant cover and soil pH were also significantly associated with belowground community composition (SI Appendix, Fig. S29; Tables S12-S13). Further, we detected some shared patterns for taxa within those chronosequences where belowground biodiversity was predicted by either pH or plant cover (see Methods). For example, we found that the relative abundance of the classes Acidobacteria group 6, Opitutae, Acidimicrobiia and Saprospirae were positively correlated with soil pH across five chronosequences (see SI Appendix, Table S14 for a complete list of taxa). Dominant taxa within these classes have previously been reported to be positively related to soil pH across the globe (1). Similarly, the relative abundances of, among others, Anaerolineae, Blastocladiomycetes and Glomeromycetes (SI Appendix, Table S14) followed a positive correlation with plant cover in chronosequences driven by this environmental factor (SI Appendix, Table S14). The fungal classes included taxa associated with plants, such as arbuscular mycorrhizal fungi (Glomeromycetes) and potential plant parasites (Blastocladiomycetes). Moreover, Anaerolineae have previously been reported to be abundant in the rhizosphere (2). These results suggest that major groups of belowground taxa follow similar temporal patterns worldwide despite the large differences in their composition across chronosequences (SI Appendix, Fig. S30 and Table S4).

## Extended acknowledgements

M.D-B. is supported by a Large Research Grant from the British Ecological Society (grant agreement n° LRA17\1193, MUSGONET). We would like to thank Matt Gebert, Jessica Henley, Victoria Ochoa and Beatriz Gozalo for their help with lab analyses. We also want to thank Lynn Riedel, Julie Larson, Katy Waechter and Drs. David Buckner and Brian Anacker for their help with soil sampling in the chronosequence from Colorado, and to the City of Boulder Open Space and Mountain Parks for allowing us to conduct these collections. S.A. and F.D.A. were funded by FONDECYT 1170995, IAI-CRN 3005, PFB-23 (from CONICYT) and P05-002 (from Millennium Scientific Initiative) to the Institute of Ecology and Biodiversity, Chile. N.A.C. acknowledges Churchill College, University of Cambridge, for financial support and Dr. Vicki Parry for fieldwork assistance. M.W. acknowledges support from the Wilderness State Park, MI for access to sample soil and conduct an ecosystem survey. O.S. acknowledges support from NSF grants DEB 1754106, DEB 1354732, DEB 1456597. S.C.R. acknowledges support from the U.S. Department of Energy Office of Science (DE-SC-0008168, DE-SC-0011806) and the U.S. Geological Survey Ecosystems Mission Area. The Arizona research sites were established with the support of an EPA - STAR Graduate Fellowship (U - 916251), a Merriam - Powell Center for Environmental Research Graduate Fellowship, an Achievement Rewards for College Scientists (ARCS) Foundation of Arizona Scholarship, and McIntire - Stennis appropriations to Northern Arizona University and the State of Arizona. A.G., F.T.M and M.D-B. acknowledge support from the Spanish Ministry (project CGL2017-88124-R). SN was funded by the Austrian Science Fund: grant Y0801-B16. F.T.M. is supported by the European Research Council (Consolidator Grant Agreement No 647038, BIODESERT). A.A.B. and F.S. acknowledge support from Jennifer Harden and Sebastian Doetterl for prior works and information about sites along the Merced Chronosequence and from Benjamin Sulman for help during sampling. N.F. was supported through grants from the U.S. National Science Foundation (EAR1331828, DEB 1556090).

## Material and Methods

**Field survey.** Field data were collected between 2016 and 2017 from 16 soil age chronosequences located in nine countries from six continents (Fig. 1; SI Appendix, Tables S2-S3). The selected chronosequences ranged from hundreds to millions of years (SI Appendix, Tables S2-S3), representing changes in soil and plant conditions during pedogenesis. These chronosequences cover a wide variety of globally distributed vegetation types (including grasslands, shrublands, forests, and croplands; see SI Appendix, Tables S2-S3 for the dominant vegetation at each chronosequence), chronosequence origins (volcanic, sedimentary, dunes, and glacier) and climatic (tropical, temperate, continental, polar and arid) types (SI Appendix, Fig. S1 and Tables S2-S3). Field surveys were conducted according to a standardized sampling protocol (3). We surveyed a 50 m × 50 m plot within each chronosequence stage. Three parallel transects of 50 m length, spaced 25 m apart, formed the basis of the plot. The size of the plot was chosen to account for the spatial heterogeneity within the selected terrestrial ecosystem including different plant sizes from grasslands to forest ecosystems. The total plant cover and the number of perennial plant species (plant diversity) were measured from data collected in each transect using the line-intercept method (3). Plant cover has also been shown to be a good predictor for tree basal area (4), a variable that is commonly used in chronosequence studies (5-6).

**Soil sampling.** Five composite soil samples (five soil cores/sample; 0-10 cm depth) were collected under the dominant ecosystem vegetation type (e.g., trees, shrubs, grasses). We selected 0-10 cm for three reasons. First, this is the most commonly-used depth in comparable studies. Second, and more importantly, most of the belowground microbial and soil animal biomass is in the top 10 cm, a critical point given the focus on soil biodiversity of our study. Finally, because some sites have very shallow soils, sampling more deeply may not even have been possible at a number of the sites, and more importantly, would have not allowed to compare the same depth increment across all chronosequences.

Following field sampling, soils were sieved (2 mm) and separated into two portions. One portion was air-dried and used for biochemical analyses and the other immediately frozen at -20 °C for molecular analyses. These storage approaches have been used widely in global field surveys (3,7-8). Sampling was conducted during the same days within each soil chronosequence. Moreover, we know that short-term climatic influences (e.g., seasonality) on soil biodiversity and community composition are much lower than that one from spatial variability associated with soil properties and perennial vegetation (9). This should be especially noticeable in locations ranging given that each of our chronosequence include locations ranging from hundreds to millions of years. Therefore, we do not expect any seasonality influence within each chronosequence.

**Soil physical and chemical analyses.** For all soil samples, we measured pH, electrical conductivity (salinity), texture (% of clay+silt), total organic carbon (C) and soil available P (Olsen inorganic P). We selected these soil variables because, together with plant cover (10), are known to be important environmental predictors of belowground biodiversity (8,11-12; Appendix S1, Table S1 for further details), and, have been reported to change predictably during pedogenesis (13-15). To avoid biases associated with having multiple laboratories analysing soils from different sites, and to facilitate the comparison of results among them, all dried soil samples were shipped to the Universidad Rey Juan Carlos (Spain) for laboratory analyses. Soil properties were determined using standardized protocols (3). Soil pH was measured in a 1:2.5 suspensions of dry soil mass to deionized water volume with a pH meter. Electrical conductivity (salinity hereafter) was measured as described in ref. 3. Texture (%)

clay + silt) was determined on a composite sample per chronosequence stage according to ref. 16. The concentration of soil total organic C (soil C hereafter) was determined by colorimetry after oxidation with a mixture of potassium dichromate and sulfuric acid (17). Total N in these samples was measured with a CN analyzer (LECO CHN628 Series, LECO Corporation, St Joseph, MI, USA). Olsen P (soil P hereafter) was determined from bicarbonate extracts as described in ref. 18. Total P was obtained using a SKALAR San++ Analyzer (Skalar, Breda, The Netherlands) after digestion with sulfuric acid (3h at 415°C; 3). The collected soils represent a wide range in soil properties. In brief, pH ranged from 3.19 to 9.45, salinity ranged from 0.00217 to 1.971 dS m<sup>-1</sup>, C from 0.3 to 473.6 g C kg<sup>-1</sup>, P from <0.01 to 90.69 mg P kg<sup>-1</sup> soil and % clay + silt from 0.27 to 86.4 %.

**Soil molecular analyses.** The diversity of soil bacteria, fungi, protists and invertebrates was measured via amplicon sequencing using the Illumina MiSeq platform. Ten grams of frozen soil/sample (from composite soil samples as explained above) were ground using a mortar and liquid N aiming to homogenize soils and obtain a representative sample. Soil DNA was extracted using the Powersoil® DNA Isolation Kit (MoBio Laboratories, Carlsbad, CA, USA) according to the manufacturer's instructions. A portion of the bacterial 16S and eukaryotic 18S rRNA genes were sequenced using the 515F/806R and Euk1391f/EukBr primer sets (12,19), respectively. Bioinformatic processing was performed using a combination of QIIME (20), USEARCH (21) and UNOISE3 (22). Phylotypes (i.e. Operational Taxonomic Units; OTUs) were identified at the 100% identity level. The OTU abundance tables were rarefied at 5000 (bacteria via 16S rRNA gene), 2000 (fungi via 18S rRNA gene), 800 (protists via 18S rRNA gene) and 300 (invertebrates via 18S rRNA gene) sequences/sample, respectively, to ensure even sampling depth within each belowground group of organisms. Protists are defined as all eukaryotic taxa, except fungi, invertebrates (Metazoa) and vascular plants (Streptophyta). Note that not all samples passed our rarefaction cut-off. The total number of samples included in statistical modelling for each chronosequence stage and group of belowground organisms can be found in SI Appendix, Table S15.

The diversity (richness, i.e., number of phylotypes, and Shannon diversity) of soil bacteria, fungi, protists and invertebrates was determined from rarefied OTU abundance tables. Before conducting statistical modelling, we also ensured that our choice of rarefaction level, taken to maximize the number of samples in our study, was not obscuring our results. Thus, using the samples with the highest sequence/sample yield, we tested for the impact of different levels of rarefaction on belowground diversity. Importantly, we found highly statistically significant correlations between the diversities and community compositions of soil bacteria (rarefied at 5000 vs. 18,000 sequences/sample), fungi (rarefied at 2,000 vs. 10,000 sequences/sample), protists (rarefied at 800 vs. 4,000 sequences/sample), and invertebrates (rarefied at 300 vs. 1,800 sequences/sample), providing evidence that our choice of rarefaction level did not affect our results or conclusions (SI Appendix, Figs S31-S32).

**Belowground biodiversity index.** To obtain a quantitative index of belowground biodiversity for each sample, the diversity of soil bacteria, fungi, protists and invertebrates were standardized using the following equation:  $((\text{rawDiversity} - \text{min}(\text{rawDiversity})) / (\text{max}(\text{rawDiversity}) - \text{min}(\text{rawDiversity})))$ , where min = minimum diversity value and max = maximum diversity (richness) value across all samples. The standardized samples were then averaged across organism groups. This is a common approach used to calculate integrated biodiversity indices for belowground (2) and aboveground (23) communities (often called multidiversity indices). For this index, we used only those soil

samples for which information on diversity for all soil bacteria, fungi, protists and invertebrates was available (SI Appendix, Table S15). The only exception was the chronosequence from Hawaii (HA; SI Appendix, Table S1), for which we had insufficient resolution (sequences/sample) to calculate the diversity of protists. In this chronosequence, belowground biodiversity only includes the diversity of soil bacteria, fungi and invertebrates. A similar approach was used in the analyses included in SI Appendix, Fig. S28.

**Changes in belowground biodiversity during pedogenesis.** We first identified the shape of the relationship between soil chronosequence stage and belowground biodiversity using the three most common regression models used to evaluate changes in soil attributes during pedogenesis: linear, quadratic and cubic (5-6, 24-27). Additionally, we also identified the shape of the relationship between perennial plant diversity and chronosequence stage. Separate analyses were carried out for each of the 16 chronosequences. Moreover, analyses were carried out for belowground biodiversity and for the diversity of individual belowground groups of organisms. As used in previous studies (5-6, 24-27), we used chronosequence stage as our surrogate of time. The use of rank values for chronosequence stage is justified, because of the high level of uncertainty in assigning precise ages for many of the chronosequences studied (5). We identified the best model for the regression between chronosequence stage and belowground biodiversity using the next set of three hierarchical rules:

- (1) *Models need to be significant* ( $P \leq 0.05$ ) (5). If only, one (out of three) models is significant, the significant model is selected by default. We used P-values from robust regressions (28-29) to avoid misinterpretation of our data resulting from outliers. We conducted these analyses using the R package *rlm* (28-29).
- (2) *Akaike information criterion*. For those significant models, best model fits were selected using Akaike Information Criteria (AICc) (30-31) where a lower AICc value represents a model with a better fit. AICc is a corrected version of AIC, which is recommended when dealing with small sample sizes, as in our case (30-31). We further used a difference in AICc values of 2 ( $\Delta\text{AICc} > 2$ ) to determine substantial differences between models (30-31). If a single model had a  $\Delta\text{AICc} > 2$  compared with the rest of the models, that model was selected as our best model. These analyses were performed using the R package *MuMIn* (32).
- (3) *Parsimony criterion*. If two or more models showed a difference in AICc values lower than 2 ( $\Delta\text{AICc} < 2$ ), we then selected the simplest model (linear > quadratic > cubic) as the best model.

**Environmental predictors of belowground biodiversity during pedogenesis.** We aimed to identify the best environmental variables, including aboveground (plant cover) and belowground (soil C and available P) resource availability, nutrient stoichiometry (soil N:P and C:N ratios) and soil abiotic factors (salinity, pH and % of clay+silt) as predictors of the changes in belowground biodiversity during pedogenesis at each soil chronosequence. Note that the concentrations of total organic C (referred above as soil C) were strongly correlated with those of total N ( $\rho = 0.90$ ;  $P < 0.001$ ,  $n = 435$ ) and dissolved inorganic N ( $\rho = 0.72$ ,  $P < 0.001$ ,  $n = 435$ ) across samples, so we kept only soil C for statistical modeling. We used plant cover data, collected *in situ* for each location, as an integrated index of plant productivity and the availability of plant C inputs, which are major resources for soil organisms. Plant cover data was positively and significantly correlated with mean annual plant productivity (2008-2017 period) estimated using remote sensing at 250m resolution ( $\rho = 0.55$ ;  $P < 0.001$ ). Moreover, plant cover was positively correlated with rates of microbial respiration based on

laboratory incubations across locations ( $\rho = 0.32$ ;  $P < 0.001$ , see Methods for details). In addition, we used Olsen P (Soil P) concentrations in our analyses as a surrogate of P availability. We expected this measure of labile P pool size to have a stronger influence on belowground communities than total P, which includes occluded and mineral-bound P. Soil P concentrations (Olsen P) were positively correlated with soil total P concentration across our samples ( $\rho = 0.73$ ,  $P < 0.001$ ,  $n = 435$ ), and to other commonly-used methods for estimating available P pool sizes (resin-P;  $\rho = 0.72$ ,  $P < 0.001$ ,  $n = 87$ ; 33). This suggests that the analytical approach used here provides a reasonable estimate of P availability across the samples included in this study.

In order to identify the environmental predictors of belowground biodiversity during pedogenesis, we used a three step approach:

- (1) *Identifying environmental predictors of pedogenesis.* As we were particularly interested in those environmental predictors that shift during pedogenesis, we first identified significant environmental predictors ( $P \leq 0.05$ ) for changes in chronosequence stages. To do this, we used Random Forest modelling as explained in ref. 34. Random Forest was chosen for these analyses because it works well with response variables with different response types, i.e. it does not require linearity. Random Forest generates a collection of classification trees with binary divisions. The fit of each tree is assessed using randomly selected cases (1/3 of the data), which are withheld during its construction (out-of-bag or OOB cases). The importance of each predictor variable was determined by evaluating the reduction in prediction accuracy (i.e. increase in the mean square error between observations and OOB predictions) when the data for that predictor were randomly permuted. This reduction was averaged over all trees to produce the final measure of importance. Notably, unlike multi-model inference using linear regressions or regression tree analyses, Random Forest alleviates multicollinearity problems in multivariate analyses by building bagged tree ensembles and including a random subset of features for each tree (9999 trees here). These analyses were conducted using the rfPermute R package (35).
- (2) *Identifying environmental predictors of belowground diversity.* Once we had identified those key environmental factors (Step 1) predicting changes in environmental conditions during pedogenesis, we then used these variables and Random Forest modelling to identify the most important predictors of changes in belowground diversity. Environmental predictors were allowed to differ for each chronosequence according to Step (1). A predictor was considered significant when  $P \leq 0.05$ .
- (3) *Clustering major belowground biodiversity patterns during pedogenesis.* Using the derived information on the importance of each significant predictor from Random Forest in Step 2, we clustered the sixteen chronosequences by their major environmental predictors (See SI Appendix, Fig. S24). To do so, we used hierarchical cluster analysis, as implemented in the “hclust” function in the R package “stats”. This analysis aimed to identify major types of ecosystem development (ecological clusters) valid across multiple soil chronosequences. Before conducting hierarchical clustering, the importance (from Random Forest) of all significant predictors within each chronosequence was standardized between 0 and 1 to allow the direct comparison of predictor importance across chronosequences in our clustering analyses. We then identified the shape of the relationships between the top significant predictor across all chronosequences from Random Forest analyses and belowground

biodiversity following the three hierarchical rules explained above (significance, AIC and parsimony).

- (4) *Chronosequence ecosystem productivity and climate as regulators of the fate of belowground biodiversity during pedogenesis.* Using information from step 3, we compared the ecosystem productivity and climate (precipitation and temperature) across chronosequence belonging to different ecological clusters (SI Appendix, Fig. S24). For ecosystem productivity, we used the Normalized Difference Vegetation Index (NDVI). This index provides a global measure of the "greenness" of vegetation across Earth's landscapes for a given composite period, and thus acts as a proxy of photosynthetic activity and large-scale vegetation distribution. The NDVI data were obtained from the Moderate Resolution Imaging Spectroradiometer (MODIS) aboard NASA's Terra satellites (<http://neo.sci.gsfc.nasa.gov/>). We calculated the monthly average value for this variable between the 2008-2017 period. We also calculated a "climatic index" as the standardized average of mean temperature and precipitation at each chronosequences using climatic data from [www.worldclim.org/](http://www.worldclim.org/). We used PERMANOVA analyses (36) to test for significant differences in ecosystem productivity and climatic index for those chronosequence belonging to different ecological clusters.

**Changes in belowground community composition dissimilarity during pedogenesis.** We evaluated the relationship between chronosequence stage and belowground community composition dissimilarity. We first calculated Bray–Curtis dissimilarity matrices for the community of soil bacteria, fungi, protists and invertebrates at the OTU level. All these distance matrices were then averaged within each chronosequence to generate a belowground community dissimilarity matrix. Note that as Bray–Curtis dissimilarities are already standardized, no further standardization was needed prior to matrix averaging. See SI Appendix, Table S15 for the number of samples within each chronosequence stage. We then used the Euclidean distance to create a matrix of environmental distance (based on plant cover, soil pH, texture, salinity, soil C, soil P, N:P and C:N ratios) across stages within each chronosequence. After this, we correlated the matrix of chronosequence stage dissimilarity to that one of belowground communities using Mantel test correlations (Spearman). Finally, we used Mantel test correlation to evaluate the correlation between belowground community dissimilarity and environmental distance.

**Environmental predictors of belowground taxa.** We conducted additional analyses to identify groups of taxa following similar environmental patterns to those reported in Fig. 3 for belowground diversity. We conducted these analyses for those chronosequences following the exact environmental pattern within the two dominant environmental predictors (pH: CAL, HA, MI, QL and MEX, and plant cover: AZ, ALPS, CI, ICE and BOS). We used Spearman correlation to identify taxa associated with either pH or plant cover. Because of the high variability in community composition at the phylotype level found for belowground community composition (SI Appendix, Fig. S30), we conducted these analyses at the class level. We retained taxa that were always positively correlated with either pH or plant cover in all five selected chronosequences.

**Table S1.** Conceptual information on complementary ecological theories and associated environmental factors potentially driving belowground biodiversity during pedogenesis.

| Ecological theory     | Above and belowground resource availability                                                                                                                                                                                                                                                                                                                                                                                                                                                                                                                                                                                                                                                                                                                                                                                                                                                                                                                  | Soil nutrient stoichiometry                                                                                                                                                                                                                                                                                                                                                                                                                                                                                                                                                                                                                                                                                                                                                                                                                                                                                                                                                                                                                                                                                                                                                                                                                          | Abiotic factors                                                                                                                                                                                                                                                                                                                                                                                                                                                                                                                                                                                                                                                                                                                        |
|-----------------------|--------------------------------------------------------------------------------------------------------------------------------------------------------------------------------------------------------------------------------------------------------------------------------------------------------------------------------------------------------------------------------------------------------------------------------------------------------------------------------------------------------------------------------------------------------------------------------------------------------------------------------------------------------------------------------------------------------------------------------------------------------------------------------------------------------------------------------------------------------------------------------------------------------------------------------------------------------------|------------------------------------------------------------------------------------------------------------------------------------------------------------------------------------------------------------------------------------------------------------------------------------------------------------------------------------------------------------------------------------------------------------------------------------------------------------------------------------------------------------------------------------------------------------------------------------------------------------------------------------------------------------------------------------------------------------------------------------------------------------------------------------------------------------------------------------------------------------------------------------------------------------------------------------------------------------------------------------------------------------------------------------------------------------------------------------------------------------------------------------------------------------------------------------------------------------------------------------------------------|----------------------------------------------------------------------------------------------------------------------------------------------------------------------------------------------------------------------------------------------------------------------------------------------------------------------------------------------------------------------------------------------------------------------------------------------------------------------------------------------------------------------------------------------------------------------------------------------------------------------------------------------------------------------------------------------------------------------------------------|
| Environmental factors | Plant cover, and soil C, N and P.                                                                                                                                                                                                                                                                                                                                                                                                                                                                                                                                                                                                                                                                                                                                                                                                                                                                                                                            | Soil N:P and C:N ratios.                                                                                                                                                                                                                                                                                                                                                                                                                                                                                                                                                                                                                                                                                                                                                                                                                                                                                                                                                                                                                                                                                                                                                                                                                             | Salinity, pH and texture.                                                                                                                                                                                                                                                                                                                                                                                                                                                                                                                                                                                                                                                                                                              |
| Theory                | <p>Belowground communities often obtain their energy from aboveground litter inputs and soil organic matter (soil C) and nutrients (soil N and P). Several prominent ecological theories emphasize the important role of aboveground and belowground resource supply and competition in regulating the diversity of plants and soil organisms in terrestrial ecosystems (14,37). Belowground biodiversity is expected to increase as resource availability increases (increasing species co-existence); however, situations with very high levels of resources often lead to high levels of biomass declining biodiversity via competitive exclusion (38). Very old soil chronosequences are known to enter a retrogressive phase, exceptionally reducing resource availability. This could potentially drive the long-term development of belowground biodiversity. Resource availability could be especially critical for low productivity ecosystems.</p> | <p>Soil nutrient stoichiometry is often associated with resource quality and its control of the relative abundance of elements in soil (14,37). Soil nutrient stoichiometry affects biotically-driven processes such as litter decomposition, mineralization and nutrient immobilization. Because, plants and belowground organisms maintain a highly conserved elemental stoichiometry driven by the relative availability of C, N and P (39), locations where one of these elements is comparatively lacking might result in a reduction of the species capable of surviving in such conditions. For example, soils with very high C:N ratios often lead to reduced mineralization and promoted nutrient immobilization, limiting the access to resources (40). Moreover, nutrient stoichiometry can potentially regulate belowground biodiversity by regulating the relative abundance of N vs. P in soils. Very old soils often lead to large reductions in P relative to N (27,40). The reason is that P is only available from the bedrock, while N can also be obtained from the atmosphere. Very low soil N:P ratio are hypothesized to reduce the number of co-existing species and processes by limiting the access to energy sources.</p> | <p>Soil salinity, very low or high pH and very low or very high fine texture content are major abiotic factors limiting the growth and biodiversity of plants and soil organisms worldwide (10) (e.g., see Appendix S1, Fig. S26). Soils are expected to become more acid, accumulate more soil fine grain sizes and increase their salinity during pedogenesis. Locations with very high levels of weathering might result in strong abiotic stresses limiting the diversity of soil organisms. Abiotic stress could be especially important during pedogenesis in highly productive environments, where plant productivity is likely to contribute to greater reductions in soil pH, and increases in salinity and fine texture.</p> |
| Examples              | <p>Soil P has been postulated for years as one of the major limiting factors for belowground biodiversity during pedogenesis (27,39-40).</p>                                                                                                                                                                                                                                                                                                                                                                                                                                                                                                                                                                                                                                                                                                                                                                                                                 | <p>Nutrient stoichiometry has been reported to be a good predictor of bacterial diversity in highly weathered soils from Scotland (41).</p>                                                                                                                                                                                                                                                                                                                                                                                                                                                                                                                                                                                                                                                                                                                                                                                                                                                                                                                                                                                                                                                                                                          | <p>Soil pH has been reported to be a major driver of biodiversity across resource gradients (25,44).</p>                                                                                                                                                                                                                                                                                                                                                                                                                                                                                                                                                                                                                               |



**Table S2. Vegetation type and age for sixteen soil chronosequences.** Vegetation community composition for each chronosequence stage is available in Appendix S1, Table S3. See Fig. 1A for the location of these chronosequences. Chronosequence origin describe the major causal agent of each chronosequence. For example, the chronosequence from ICE takes place on volcanic soils, but it is classified as a glacier chronosequence. Biome classification followed the Köppen climate classification and the major vegetation types found in our database. Aridity classification followed the Aridity Index (AI) classification: arid ( $0.05 > AI < 0.20$ ), semiarid ( $0.20 > AI < 0.50$ ), dry-subhumid ( $0.50 > AI < 0.65$ ) and mesic ( $AI > 0.65$ ).

| Label | Country   | Name           | Age         | Chronosequence origin | Aridity classification | Biome                | MAT (°C) | MAP (mm) |
|-------|-----------|----------------|-------------|-----------------------|------------------------|----------------------|----------|----------|
|       |           |                |             |                       | Mesic                  |                      |          |          |
| ALPS  | Austria   | Alps           | 0.01-120ky  | Glacier               |                        | Alpine ecosystems    | 0.60     | 1182     |
| AZ    | USA       | SAGA           | 0.9-3000ky  | Volcanic              | Semiarid               | Arid forests         | 9.68     | 427      |
| BOS   | Bolivia   | Cojiri         | 0.025-20ky  | Sedimentary           | Arid                   | Arid shrublands      | 8.40     | 141      |
| BOV   | Bolivia   | Chiar Kkollu   | 0.025-20ky  | Volcanic              | Arid                   | Arid shrublands      | 7.55     | 106      |
| CAL   | USA       | Merced         | 0.1-3000ky  | Sedimentary           | Semiarid               | Temperate grasslands | 16.32    | 360      |
| CH    | Chile     | Conguillio     | 0.06-5000ky | Volcanic              | Mesic                  | Temperate forests    | 8.95     | 1917     |
| CI    | Spain     | La Palma       | 0.5-1700ky  | Volcanic              | Dry-subhumid           | Temperate forests    | 13.27    | 507      |
| CO    | USA       | Coal creek     | 5-2000ky    | Sedimentary           | Semiarid               | Cold grasslands      | 8.95     | 431      |
| HA    | USA       | Hawaii         | 0.3-4100ky  | Volcanic              | Mesic                  | Tropical forests     | 16.03    | 1885     |
| ICE   | Iceland   | Mt Hekla       | 0.1-0.9ky   | Glacier               | Mesic                  | Polar moss heaths    | 3.70     | 1339     |
| JOR   | USA       | Jornada Desert | 1.1-25ky    | Sedimentary           | Arid                   | Arid forblands       | 14.65    | 265      |
| MEX   | Mexico    | Chichinautzin  | 1-100ky     | Volcanic              | Mesic                  | Temperate forests    | 11.06    | 1235     |
| MI    | USA       | Lake Michigan  | 0.7-4ky     | Sand dunes            | Mesic                  | Cold forests         | 6.10     | 774      |
| QL    | Australia | Cooloola       | 3.6-716ky   | Sand dunes            | Mesic                  | Temperate forests    | 20.77    | 1516     |
| TA    | Taiwan    | Taiwan         | 28-399ky    | Sedimentary           | Mesic                  | Temperate croplands  | 21.33    | 2365     |
| WA    | Australia | Jurien Bay     | 0.1-2000ky  | Sand dunes            | Semiarid               | Temperate shrublands | 18.97    | 557      |

**Table S3.** Dominant vegetation community composition in each of the stages for the 16 soil chronosequences included in this study. See Appendix S1, Fig. 1A for the location of these chronosequences.

| Name | Stage | Age (years) | Dominant vegetation                                                                                                                                                                                                                                                                                                                 |
|------|-------|-------------|-------------------------------------------------------------------------------------------------------------------------------------------------------------------------------------------------------------------------------------------------------------------------------------------------------------------------------------|
| ALPS | 1     | 10          | <i>Saxifraga azoides</i> , <i>Saxifraga oppositifolia</i> , <i>Poa alpina</i> , <i>Linaria alpina</i> , <i>Artemisia gentipi</i>                                                                                                                                                                                                    |
|      | 2     | 45          | <i>Trifolium pallescens</i> , <i>Campanula scheuchzeri</i> , <i>Saxifraga oppositifolia</i> , <i>Saxifraga aizoides</i>                                                                                                                                                                                                             |
|      | 3     | 125         | <i>Kobresia myosuroides</i> , <i>Agrostis alpina</i> , <i>Alchemilla fissa</i> , <i>Trifolium pratense</i> spp., <i>Nivale</i>                                                                                                                                                                                                      |
|      | 4     | 10000       | <i>Avenula versicolor</i> , <i>Carex sempervirens</i> , <i>Festuca halleri</i> , <i>Anthoxanthum alpinum</i>                                                                                                                                                                                                                        |
|      | 5     | 120000      | <i>Fagus sylvatica</i> , <i>Abies alba</i> , <i>Acer pseudoplatanus</i> , <i>Picea abies</i> , <i>Quercus robur</i>                                                                                                                                                                                                                 |
| AZ   | 1     | 900         | <i>Juniperus monosperma</i> , <i>Pinus edulis</i> , <i>Bouteloua gracilis</i>                                                                                                                                                                                                                                                       |
|      | 2     | 55000       | <i>Juniperus monosperma</i> , <i>Pinus edulis</i> , <i>Bouteloua gracilis</i>                                                                                                                                                                                                                                                       |
|      | 3     | 750000      | <i>Juniperus monosperma</i> , <i>Pinus edulis</i> , <i>Bouteloua gracilis</i>                                                                                                                                                                                                                                                       |
|      | 4     | 3000000     | <i>Juniperus monosperma</i> , <i>Pinus edulis</i> , <i>Bouteloua gracilis</i>                                                                                                                                                                                                                                                       |
| BOS  | 1     | 25          | <i>Astragalus pusillus</i> , <i>Atriplex imbricata</i> , <i>Baccharis boliviensis</i> , <i>Baccharis tola</i> , <i>Ephedra breana</i> , <i>Haplopappus rigidus</i> , <i>Junellia seriphioides</i> , <i>Lycium chanan</i> , <i>Opuntia boliviensis</i>                                                                               |
|      | 2     | 11400       | <i>Fabiana densa</i> , <i>Atriplex imbricata</i> , <i>Baccharis boliviensis</i> , <i>Lycium chanan</i> , <i>Baccharis tola</i> , <i>Haplopappus rigidus</i> , <i>Hoffmannseggia minor</i> , <i>Junellia seriphioides</i> , <i>Mutisia ledifolia</i> , <i>Nassella curviseta</i>                                                     |
|      | 3     | 14100       | <i>Atriplex imbricata</i> , <i>Baccharis boliviensis</i> , <i>Haplopappus rigidus</i> , <i>Junellia seriphioides</i> , <i>Lycium chanan</i> , <i>Mutisia ledifolia</i> , <i>Nassella curviseta</i> , <i>Trichocereus atacamensis</i>                                                                                                |
|      | 4     | 20000       | <i>Atriplex imbricata</i> , <i>Baccharis boliviensis</i> , <i>Cheilanthes ternifolia</i> , <i>Diplostephium cinereum</i> , <i>Ephedra breana</i> , <i>Fabiana densa</i> , <i>Lycium chanan</i> , <i>Mutisia ledifolia</i> , <i>Senecio dryophyllus</i> , <i>Senecio nutans</i> , <i>Stevia</i> sp., <i>Trichocereus atacamensis</i> |
| BOV  | 1     | 25          | <i>Adesmia spinosa</i> , <i>Atriplex imbricata</i> , <i>Chuquiraga atacamensis</i> , <i>Frankenia triandra</i> , <i>Sisymbrium</i> sp., <i>Nassella curviseta</i>                                                                                                                                                                   |
|      | 2     | 11400       | <i>Opuntia boliviensis</i> , <i>Acantholippia punensis</i> , <i>Atriplex imbricata</i> , <i>Chuquiraga atacamensis</i> , <i>Ephedra breana</i> , <i>Senecio dryophyllus</i> , <i>Sisymbrium</i> sp.                                                                                                                                 |
|      | 3     | 14100       | <i>Acantholippia punensis</i> , <i>Adesmia spinosa</i> , <i>Atriplex imbricata</i> , <i>Chuquiraga atacamensis</i> , <i>Nassella curviseta</i>                                                                                                                                                                                      |
|      | 4     | 20000       | <i>Acantholippia punensis</i> , <i>Atriplex imbricata</i> , <i>Chuquiraga atacamensis</i> , <i>Senecio dryophyllus</i>                                                                                                                                                                                                              |
| CAL  | 1     | 100         | <i>Populus fremontii</i> , <i>Helianthus annuus</i> , <i>Amaranthus albus</i>                                                                                                                                                                                                                                                       |
|      | 2     | 3000        | <i>Quercus lobata</i> , <i>Silybum marianum</i> , <i>Hordeum murinum</i> L                                                                                                                                                                                                                                                          |
|      | 3     | 30000       | <i>Festuca californica</i>                                                                                                                                                                                                                                                                                                          |
|      | 5     | 600000      | <i>Rytidosperma penicillatum</i>                                                                                                                                                                                                                                                                                                    |
|      | 6     | 3000000     | <i>Festuca bromoides</i> , <i>F. myuros</i> , <i>Bromus hordaceus</i> , <i>B. diandrus</i>                                                                                                                                                                                                                                          |
| CH   | 1     | 60          | <i>Gaultheria pumila</i> , <i>Racomitrium lanuginosum</i>                                                                                                                                                                                                                                                                           |
|      | 2     | 266         | <i>Lomatia hirsuta</i> , <i>Austrocedrus chilensis</i>                                                                                                                                                                                                                                                                              |
|      | 3     | 776         | <i>Araucaria araucana</i> , <i>Nothofagus antarctica</i>                                                                                                                                                                                                                                                                            |
|      | 4     | 3470        | <i>Nothofagus dombeyi</i> , <i>Araucaria araucana</i>                                                                                                                                                                                                                                                                               |

|     |   |             |                                                                                                                                                                                                                                                                                                                    |
|-----|---|-------------|--------------------------------------------------------------------------------------------------------------------------------------------------------------------------------------------------------------------------------------------------------------------------------------------------------------------|
|     | 5 | 60000       | <i>Nothofagus dombeyi, N. obliqua, N. alpina</i>                                                                                                                                                                                                                                                                   |
|     | 6 | 5000000     | <i>Nothofagus dombeyi, N. alpina</i>                                                                                                                                                                                                                                                                               |
| CI  | 2 | 525         | <i>Pinus canariensis</i>                                                                                                                                                                                                                                                                                           |
|     | 3 | 6000        | <i>Pinus canariensis, Erica arborea, Pteroccephalus porphyranthus</i>                                                                                                                                                                                                                                              |
|     | 4 | 40000       | <i>Pinus canariensis, Adenocarpus viscosus, Chamaecytisus proliferus, Erica arborea</i>                                                                                                                                                                                                                            |
|     | 5 | 600000      | <i>Pinus canariensis, Adenocarpus viscosus</i>                                                                                                                                                                                                                                                                     |
|     | 6 | 1100000     | <i>Pinus canariensis, Cistus symphytifolius</i>                                                                                                                                                                                                                                                                    |
|     | 7 | 1700000     | <i>Pinus canariensis, Cistus symphytifolius</i>                                                                                                                                                                                                                                                                    |
| CO  | 1 | 5000        | <i>Juncus arcticus, Andropogon gerardii, Panicum virgatum</i>                                                                                                                                                                                                                                                      |
|     | 2 | 140000      | <i>Andropogon gerardii, Panicum virgatum</i>                                                                                                                                                                                                                                                                       |
|     | 3 | 240000      | <i>Panicum virgatum, Poa compressa, Andropogon gerardii</i>                                                                                                                                                                                                                                                        |
|     | 4 | 640000      | <i>Chrysopsis sp, Andropogon gerardii, L. cinquefoil</i>                                                                                                                                                                                                                                                           |
|     | 5 | 1000000     | <i>Andropogon gerardii, M. Burgia, Poa compressa,</i>                                                                                                                                                                                                                                                              |
|     | 6 | 2000000     | <i>Andropogon gerardii, Poa compressa, M. Burgia</i>                                                                                                                                                                                                                                                               |
|     |   |             | <i>Metrosideros polymorpha, Morella faya, Vaccinium calycinum, Ilex anomala, Cheirodendron trigynum, Cibotium glaucom, Hedychium gardnerianum, Isoetes sp. (grass), Coprosma sp., Myrsine lessertiana, Dicranopteris linearis, Machaerina angustifolia, Anemone hupehensis, , ,</i>                                |
| HA  | 1 | 300         | <i>Metrosideros polymorpha, Cheirodendron trigynum, Cibotium glaucom, Cibotium menziesii, Ilex anomala, Freycinetia arborea, Astelia menziesii, Melicope clusiifolia, Vaccinium calycinum, Nephrolepis sp., Asplenium spp. (multi), Athyrium microphyllum, Ilex myrtifolia, Peperomia sp., Polypodium sp.,</i>     |
|     | 2 | 20000       | <i>Metrosideros polymorpha, Cibotium glaucom, Cibotium menziesii, Hedychium gardnerianum, Vaccinium calycinum, Cheirodendron trigynum, Psidium cattleianum, Dicranopteris linearis, Asplenium sp., Melicope clusiifolia, Myrsine sandwicensis, Elaphoglossum sp, Polygonum punctatum (sic?) (water smartweed),</i> |
|     | 3 | 150000      | <i>Tibouchina herbacea, Peperomia sp., Psilotum nudum</i>                                                                                                                                                                                                                                                          |
|     | 4 | 4100000     | <i>Metrosideros polymorpha, Hedychium gardnerianum, Dicranopteris linearis, Pittosporum gayanum, Psidium cattleianum, Astelia menziesiana, Morella faya, Vaccinium meyenianum, Smilax hawaiiensis, Elaphoglossum spp, Elaeocarpus bifidus, Clerodendrum sp, Alyxia oliviformis,</i>                                |
| ICE | 1 | 172         | <i>Racomitrium lanuginosum; Empetrum nigrum; Stereocaulon vesuvianum</i>                                                                                                                                                                                                                                           |
|     | 2 | 463         | <i>Racomitrium lanuginosum; Empetrum nigrum; Arctostaphylos uva-ursi</i>                                                                                                                                                                                                                                           |
|     | 3 | 628         | <i>Racomitrium lanuginosum; Betula nana; Hylocomium splendens; Empetrum nigrum; Arctostaphylos uva-ursi</i>                                                                                                                                                                                                        |
|     | 4 | 717         | <i>Racomitrium lanuginosum; Salix phylicifolia; Empetrum nigrum; Hylocomium splendens</i>                                                                                                                                                                                                                          |
|     | 5 | 859         | <i>Racomitrium lanuginosum; Empetrum nigrum; Betula nana; Hylocomium splendens</i>                                                                                                                                                                                                                                 |
| JOR | 1 | 1100-2200   | <i>Opuntia phaeacantha Engelm. var., Boerhavia spp., Eragrostis Lehmanniana Ness.</i>                                                                                                                                                                                                                              |
|     | 2 | 2200-7000   | <i>Sporobolus contractus Hitchc., Muhlenbergia Porteri Scribn., Larrea tridentata Cov., Ephedra trifurca Torr.</i>                                                                                                                                                                                                 |
|     | 3 | 8000-15000  | <i>Boerhavia spp., Larrea tridentata Cov.</i>                                                                                                                                                                                                                                                                      |
|     | 4 | 25000-75000 | <i>Boerhavia spp., Ephedra trifurca Torr., Erioneuron pulchellum</i>                                                                                                                                                                                                                                               |

|     |    |        |                                                                                                                                                                                                                                                                                                                                                                                                                                                                                                                                                                                                                                                                                                                                                                                                                      |
|-----|----|--------|----------------------------------------------------------------------------------------------------------------------------------------------------------------------------------------------------------------------------------------------------------------------------------------------------------------------------------------------------------------------------------------------------------------------------------------------------------------------------------------------------------------------------------------------------------------------------------------------------------------------------------------------------------------------------------------------------------------------------------------------------------------------------------------------------------------------|
| MEX | 1  | 1000   | <i>Pinus montezumae</i> , <i>Bacharis conferta</i> , <i>Alnus firmifolia</i> , <i>Penstemon</i> sp.<br><i>Abies religiosa</i> , <i>Arbutus xalapensis</i> , <i>Pinus herrerae</i> , <i>Bacharis conferta</i> , <i>Pinus montezumae</i> , <i>Penstemon</i> sp., <i>Bacharis conferta</i> , <i>Buddleja</i> sp.,                                                                                                                                                                                                                                                                                                                                                                                                                                                                                                       |
|     | 2  | 1835   |                                                                                                                                                                                                                                                                                                                                                                                                                                                                                                                                                                                                                                                                                                                                                                                                                      |
|     | 3  | 3800   | <i>Alnus firmifolia</i> , <i>Quercus laurina</i> , <i>Pinus montezumae</i> , <i>Pinus pseudostrobus</i>                                                                                                                                                                                                                                                                                                                                                                                                                                                                                                                                                                                                                                                                                                              |
|     | 4  | 6200   | <i>Pinus montezumae</i> , <i>Alnus firmifolia</i>                                                                                                                                                                                                                                                                                                                                                                                                                                                                                                                                                                                                                                                                                                                                                                    |
|     | 5  | 8000   | <i>Pinus montezumae</i> , <i>Bacharis conferta</i> , <i>Buddleja parviflora</i>                                                                                                                                                                                                                                                                                                                                                                                                                                                                                                                                                                                                                                                                                                                                      |
|     | 6  | 10000  | <i>Pinus patula</i> , <i>Alnus firmifolia</i> , <i>Pinus montezumae</i> , <i>Senecio</i> sp                                                                                                                                                                                                                                                                                                                                                                                                                                                                                                                                                                                                                                                                                                                          |
|     | 7  | 30500  | <i>Pinus ayacahuite</i> , <i>Pinus pseudostrobus</i> , <i>Pinus montezumae</i><br><i>Pinus montezumae</i> , <i>Abies religiosa</i> , <i>Quercus laurina</i> , <i>Penstemon</i> sp., <i>Bacharis conferta</i>                                                                                                                                                                                                                                                                                                                                                                                                                                                                                                                                                                                                         |
|     | 8  | 100000 | <i>Amophilous breviligulata</i> , <i>Agropyron dasystachium</i> , <i>Cerisium pitheri</i> ,<br><i>Arctostaphylos uva-ursi</i>                                                                                                                                                                                                                                                                                                                                                                                                                                                                                                                                                                                                                                                                                        |
| MI  | 1  | 73     | <i>Amophilous breviligulata</i> , <i>Agropyron dasystachium</i> , <i>Cerisium pitheri</i> ,<br><i>Arctostaphylos uva-ursi</i>                                                                                                                                                                                                                                                                                                                                                                                                                                                                                                                                                                                                                                                                                        |
|     | 2  | 113    | <i>Amophilous breviligulata</i> , <i>Agropyron dasystachium</i> , <i>Cerisium pitheri</i> ,<br><i>Arctostaphylos uva-ursi</i> , <i>Schizachyrium scoparium</i>                                                                                                                                                                                                                                                                                                                                                                                                                                                                                                                                                                                                                                                       |
|     | 3  | 163    | <i>Arctostaphylos uva-ursi</i> , <i>Juniperus communis</i> , <i>Pinus strobus</i>                                                                                                                                                                                                                                                                                                                                                                                                                                                                                                                                                                                                                                                                                                                                    |
|     | 4  | 243    | <i>Pteridium aquilinum</i> , <i>Pinus resinosa</i> , <i>Abies</i> sp                                                                                                                                                                                                                                                                                                                                                                                                                                                                                                                                                                                                                                                                                                                                                 |
|     | 5  | 485    | <i>Gaultheria procumbens</i> , <i>Pinus resinosa</i> , <i>Betula papyrifera</i>                                                                                                                                                                                                                                                                                                                                                                                                                                                                                                                                                                                                                                                                                                                                      |
|     | 6  | 863    | <i>Abies balsamea</i> , <i>Pinus resinosa</i> , <i>Juniperus communis</i>                                                                                                                                                                                                                                                                                                                                                                                                                                                                                                                                                                                                                                                                                                                                            |
|     | 7  | 1400   | <i>Abies balsamea</i> , <i>Pinus resinosa</i> , <i>Pinus strobus</i>                                                                                                                                                                                                                                                                                                                                                                                                                                                                                                                                                                                                                                                                                                                                                 |
|     | 8  | 2500   | <i>Pinus resinosa</i> , <i>Vaccinium myrtilloides</i> , <i>Gaultheria procumbens</i>                                                                                                                                                                                                                                                                                                                                                                                                                                                                                                                                                                                                                                                                                                                                 |
|     | 9  | 3200   | <i>Pinus resinosa</i> , <i>Vaccinium myrtilloides</i> , <i>Gaultheria procumbens</i>                                                                                                                                                                                                                                                                                                                                                                                                                                                                                                                                                                                                                                                                                                                                 |
|     | 10 | 4000   | <i>Pinus resinosa</i> , <i>Pinus strobus</i> , <i>Gaultheria procumbens</i>                                                                                                                                                                                                                                                                                                                                                                                                                                                                                                                                                                                                                                                                                                                                          |
| QL  | 1  | 3600   | <i>Eucalyptus tessellaris</i> , <i>Angophora costata</i> , <i>Eucalyptus intermedia</i> , <i>Casuarina littoralis</i> , <i>Melaleuca quinquenerva</i> , <i>Banksia integrifolia</i> , <i>Banksia serrata</i> , <i>Macrozamia</i> spp., <i>Acacia aulacocarpa</i> , <i>Acacia flavescens</i> , <i>Groundstorey</i> , <i>Cassytha paniculata</i> , <i>Gahnia sieberiana</i> , <i>Hardenbergia violacea</i><br><i>Eucalyptus tessellaris</i> , <i>Angophora costata</i> , <i>Eucalyptus intermedia</i> , <i>Casuarina littoralis</i> , <i>Melaleuca quinquenerva</i> , <i>Banksia integrifolia</i> , <i>Banksia serrata</i> , <i>Macrozamia</i> spp., <i>Acacia aulacocarpa</i> , <i>Acacia flavescens</i> , <i>Groundstorey</i> , <i>Cassytha paniculata</i> , <i>Gahnia sieberiana</i> , <i>Hardenbergia violacea</i> |
|     | 2  | 6700   | <i>Eucalyptus tessellaris</i> , <i>Angophora costata</i> , <i>Eucalyptus intermedia</i> , <i>Casuarina littoralis</i> , <i>Melaleuca quinquenerva</i> , <i>Banksia integrifolia</i> , <i>Banksia serrata</i> , <i>Macrozamia</i> spp., <i>Acacia aulacocarpa</i> , <i>Acacia flavescens</i> , <i>Groundstorey</i> , <i>Cassytha paniculata</i> , <i>Gahnia sieberiana</i> , <i>Hardenbergia violacea</i>                                                                                                                                                                                                                                                                                                                                                                                                             |
|     | 3  | 134000 | <i>Eucalyptus tessellaris</i> , <i>Angophora costata</i> , <i>Eucalyptus intermedia</i> , <i>Casuarina littoralis</i> , <i>Melaleuca quinquenerva</i> , <i>Banksia integrifolia</i> , <i>Banksia serrata</i> , <i>Macrozamia</i> spp., <i>Acacia aulacocarpa</i> , <i>Acacia flavescens</i> , <i>Groundstorey</i> , <i>Cassytha paniculata</i> , <i>Gahnia sieberiana</i> , <i>Hardenbergia violacea</i>                                                                                                                                                                                                                                                                                                                                                                                                             |
|     | 4  | 176000 | <i>Eucalyptus tessellaris</i> , <i>Angophora costata</i> , <i>Eucalyptus intermedia</i> , <i>Casuarina littoralis</i> , <i>Melaleuca quinquenerva</i> , <i>Banksia integrifolia</i> , <i>Banksia serrata</i> , <i>Macrozamia</i> spp., <i>Acacia aulacocarpa</i> , <i>Acacia flavescens</i> , <i>Groundstorey</i> , <i>Cassytha paniculata</i> , <i>Gahnia sieberiana</i> , <i>Hardenbergia violacea</i>                                                                                                                                                                                                                                                                                                                                                                                                             |
|     | 5  | 324000 | <i>Eucalyptus tessellaris</i> , <i>Angophora costata</i> , <i>Eucalyptus intermedia</i> , <i>Casuarina littoralis</i> , <i>Melaleuca quinquenerva</i> , <i>Banksia integrifolia</i> , <i>Banksia serrata</i> , <i>Macrozamia</i> spp., <i>Acacia aulacocarpa</i> , <i>Acacia flavescens</i> , <i>Groundstorey</i> , <i>Cassytha paniculata</i> , <i>Gahnia sieberiana</i> , <i>Hardenbergia violacea</i>                                                                                                                                                                                                                                                                                                                                                                                                             |
|     | 6  | 716000 | <i>Eucalyptus tessellaris</i> , <i>Angophora costata</i> , <i>Eucalyptus intermedia</i> , <i>Casuarina littoralis</i> , <i>Melaleuca quinquenerva</i> , <i>Banksia integrifolia</i> , <i>Banksia serrata</i> , <i>Macrozamia</i> spp., <i>Acacia aulacocarpa</i> , <i>Acacia flavescens</i> , <i>Groundstorey</i> , <i>Cassytha paniculata</i> , <i>Gahnia sieberiana</i> , <i>Hardenbergia violacea</i>                                                                                                                                                                                                                                                                                                                                                                                                             |
| TA  | 1  | 28000  | <i>Tea camellia</i>                                                                                                                                                                                                                                                                                                                                                                                                                                                                                                                                                                                                                                                                                                                                                                                                  |

---

|    |   |         |                                                                                                           |
|----|---|---------|-----------------------------------------------------------------------------------------------------------|
|    | 2 | 105000  | <i>Tea camellia</i>                                                                                       |
|    | 3 | 322000  | <i>Tea camellia</i>                                                                                       |
|    | 4 | 399000  | <i>Tea camellia</i>                                                                                       |
| WA | 1 | 100     | <i>Acacia cyclops, Acacia rostellifera, Scaevola crassifolia, Olearia axillaris, Spyridium globulosum</i> |
|    | 2 | 1000    | <i>Melaleuca systema, Acacia lasiocarpa, Acacia rostellifera</i>                                          |
|    | 3 | 6500    | <i>Melaleuca systema, Acacia lasiocarpa, Acacia rostellifera</i>                                          |
|    | 4 | 120000  | <i>Melaleuca systema, Banksia leptophylla, Calothamnus quadrifidus</i>                                    |
|    | 5 | 480000  | <i>Banksia menziesii, Banksia attenuata, Mesomelaena pseudostygia, Hibbertia hypericoides</i>             |
|    | 6 | 2000000 | <i>Banksia menziesii, Jacksonia floribunda, Banksia leptophylla</i>                                       |

---

**Table S4.** Mean values (%) for the relative abundance of main taxonomic groups within bacteria, fungi, protists and soil invertebrates in each of the stages for 16 soil chronosequences included in this study. A “-“ symbol indicates no data.

| Name | Stage | Bacteria      |                 |                 | Fungi       |                |               | Invertebrates |          |          | Protists |            |        |
|------|-------|---------------|-----------------|-----------------|-------------|----------------|---------------|---------------|----------|----------|----------|------------|--------|
|      |       | Acidobacteria | Actino bacteria | Proteo bacteria | Asco mycota | Basidio mycota | Mucoro mycota | Arthropoda    | Nematoda | Rotifera | Cercozoa | Ciliophora | Lobosa |
| ALPS | 1     | 10.09         | 8.28            | 40.20           | 39.80       | 31.48          | 18.00         | 37.17         | 45.00    | 14.92    | 29.23    | 11.05      | 0.50   |
|      | 2     | 10.94         | 16.47           | 37.35           | 38.11       | 40.00          | 14.04         | 0.60          | 80.87    | 6.33     | 24.70    | 18.45      | 0.65   |
|      | 3     | 11.75         | 16.35           | 37.07           | 40.94       | 33.65          | 16.05         | 5.33          | 77.33    | 7.73     | 42.60    | 15.88      | 0.85   |
|      | 4     | 13.79         | 14.38           | 32.13           | 40.45       | 36.96          | 17.23         | 4.73          | 72.53    | 4.20     | 28.40    | 17.48      | 2.50   |
|      | 5     | 33.89         | 11.47           | 30.35           | 26.60       | 46.45          | 24.60         | 5.44          | 68.22    | 6.00     | 39.96    | 18.75      | 5.71   |
| AZ   | 1     | 14.72         | 20.07           | 33.82           | 59.55       | 33.29          | 2.73          | 3.89          | 79.89    | 6.89     | 16.09    | 51.53      | 9.59   |
|      | 2     | 12.31         | 26.29           | 30.45           | 58.01       | 26.05          | 4.99          | 37.67         | 22.83    | 23.58    | 28.16    | 39.09      | 6.22   |
|      | 3     | 15.28         | 25.32           | 25.95           | 68.54       | 27.35          | 0.35          | 41.67         | 46.20    | 6.40     | 22.93    | 48.45      | 7.33   |
|      | 4     | 18.56         | 24.33           | 25.57           | 54.21       | 36.48          | 1.19          | 14.83         | 55.67    | 12.92    | 23.38    | 47.03      | 6.38   |
| BOS  | 1     | 11.38         | 31.49           | 23.76           | 67.56       | 11.48          | 3.02          | 2.33          | 96.33    | 0.00     | 14.58    | 54.18      | 15.33  |
|      | 2     | 16.56         | 22.74           | 23.52           | 63.30       | 18.15          | 1.93          | 16.25         | 77.00    | 6.42     | 17.31    | 45.72      | 8.75   |
|      | 3     | 8.89          | 26.43           | 27.12           | 59.68       | 6.63           | 2.81          | 0.50          | 95.67    | 0.00     | 13.41    | 55.00      | 8.41   |
|      | 4     | 18.37         | 22.45           | 22.78           | 63.07       | 19.86          | 5.30          | 24.13         | 58.40    | 5.13     | 31.05    | 36.28      | 6.60   |
| BOV  | 1     | 27.45         | 18.63           | 36.10           | 26.15       | 10.05          | 63.35         | 20.00         | 14.67    | 1.33     | 9.56     | 73.63      | 10.63  |
|      | 2     | 12.06         | 13.04           | 40.86           | 99.95       | 0.05           | 0.00          | 100.00        | 0.00     | 0.00     | 0.00     | 100.00     | 0.00   |
|      | 3     | 9.24          | 20.53           | 32.28           | 81.48       | 5.87           | 2.22          | 0.00          | 44.67    | 54.33    | 14.81    | 29.00      | 7.44   |
|      | 4     | 12.37         | 18.38           | 31.95           | 62.85       | 16.75          | 0.17          | 24.11         | 25.44    | 50.33    | 25.54    | 47.92      | 4.21   |
| CAL  | 1     | 9.90          | 16.92           | 29.58           | 34.38       | 50.81          | 4.14          | 68.80         | 1.60     | 8.07     | 13.53    | 13.78      | 6.08   |
|      | 2     | 12.35         | 17.89           | 34.09           | 54.94       | 33.32          | 8.30          | 8.20          | 64.73    | 1.40     | 40.63    | 23.73      | 6.90   |
|      | 3     | 14.78         | 20.88           | 33.59           | 50.32       | 29.35          | 11.52         | 42.58         | 8.25     | 21.50    | 17.90    | 15.35      | 7.98   |
|      | 4     | 11.36         | 21.11           | 35.03           | 74.47       | 13.85          | 1.95          | 12.20         | 66.73    | 4.40     | 33.83    | 41.40      | 3.95   |
|      | 5     | 13.04         | 15.84           | 28.36           | 80.05       | 13.75          | 0.63          | 25.93         | 52.80    | 11.53    | 31.15    | 38.53      | 2.83   |
| CH   | 1     | 13.07         | 21.57           | 23.68           | 41.81       | 49.27          | 2.85          | 21.92         | 21.67    | 22.58    | 44.00    | 12.47      | 5.88   |
|      | 2     | 16.71         | 11.97           | 31.80           | 64.60       | 17.46          | 12.62         | 15.75         | 43.08    | 10.33    | 39.00    | 8.28       | 11.06  |
|      | 3     | 16.60         | 14.97           | 33.16           | 29.68       | 47.08          | 19.30         | 19.27         | 27.07    | 26.93    | 41.13    | 11.05      | 7.95   |
|      | 4     | 18.16         | 10.90           | 40.78           | 18.13       | 59.53          | 18.16         | 21.13         | 43.20    | 6.33     | 43.88    | 12.53      | 3.58   |
|      | 5     | 13.11         | 18.22           | 40.08           | 35.31       | 39.72          | 19.26         | 12.27         | 62.27    | 7.93     | 47.20    | 11.25      | 3.00   |
|      | 6     | 16.55         | 12.45           | 42.45           | 27.33       | 46.31          | 22.95         | 24.08         | 45.17    | 10.50    | 46.97    | 8.38       | 3.84   |
| CI   | 1     | 14.97         | 25.50           | 27.64           | 56.22       | 28.47          | 4.79          | 17.00         | 42.25    | 33.92    | 33.83    | 23.78      | 4.48   |
|      | 2     | 14.95         | 18.85           | 24.23           | 61.04       | 25.08          | 2.67          | 3.25          | 44.50    | 5.08     | 33.28    | 11.70      | 12.40  |
|      | 3     | 13.78         | 19.64           | 32.68           | 51.20       | 30.19          | 10.48         | 21.00         | 61.73    | 11.33    | 31.30    | 36.90      | 5.33   |

|     |   |       |       |       |       |       |       |       |       |       |       |       |       |
|-----|---|-------|-------|-------|-------|-------|-------|-------|-------|-------|-------|-------|-------|
|     | 4 | 12.31 | 19.55 | 30.79 | 41.22 | 47.99 | 7.56  | 47.73 | 41.33 | 1.87  | 34.17 | 42.71 | 2.88  |
|     | 5 | 12.44 | 19.84 | 41.23 | 44.75 | 44.28 | 8.84  | 36.33 | 50.75 | 8.00  | 27.56 | 42.13 | 12.06 |
|     | 6 | 13.50 | 21.92 | 32.40 | 41.96 | 51.02 | 3.01  | 17.75 | 64.00 | 6.75  | 37.95 | 29.45 | 7.78  |
| CO  | 1 | 12.06 | 23.50 | 28.29 | 47.00 | 24.12 | 17.85 | 29.80 | 47.00 | 5.60  | 40.28 | 14.30 | 7.90  |
|     | 2 | 11.18 | 27.39 | 26.30 | 61.04 | 19.47 | 7.30  | 14.93 | 40.07 | 24.13 | 29.78 | 24.80 | 6.90  |
|     | 3 | 11.44 | 25.77 | 24.19 | 55.23 | 14.94 | 9.39  | 19.67 | 47.40 | 18.53 | 36.58 | 23.73 | 7.85  |
|     | 4 | 11.90 | 27.71 | 27.45 | 67.01 | 15.31 | 8.89  | 11.53 | 62.27 | 8.67  | 32.20 | 26.23 | 6.75  |
|     | 5 | 10.23 | 24.03 | 28.11 | 61.92 | 20.16 | 3.28  | 27.42 | 42.33 | 24.92 | 30.43 | 20.08 | 7.60  |
|     | 6 | 11.86 | 26.36 | 28.28 | 63.87 | 13.80 | 9.81  | 13.60 | 52.87 | 13.60 | 28.08 | 29.83 | 4.43  |
| HA  | 1 | 23.64 | 7.48  | 38.20 | 61.13 | 30.46 | 7.33  | 27.75 | 43.08 | 1.75  | -     | -     | -     |
|     | 2 | 33.13 | 10.62 | 35.09 | 68.99 | 18.68 | 8.80  | 35.08 | 22.00 | 8.42  | -     | -     | -     |
|     | 3 | 27.41 | 13.85 | 29.79 | 65.73 | 22.88 | 5.13  | 39.33 | 23.67 | 17.17 | -     | -     | -     |
|     | 4 | 21.68 | 12.02 | 32.85 | 61.28 | 22.88 | 11.38 | 49.17 | 28.33 | 8.33  | -     | -     | -     |
| ICE | 1 | 20.70 | 6.39  | 31.28 | 58.99 | 34.19 | 5.12  | 4.67  | 28.73 | 24.13 | 27.55 | 28.30 | 11.83 |
|     | 2 | 20.87 | 9.57  | 33.81 | 29.32 | 60.95 | 4.02  | 11.07 | 58.20 | 12.67 | 24.88 | 25.78 | 4.53  |
|     | 3 | 15.16 | 10.07 | 33.27 | 35.19 | 46.42 | 13.97 | 7.00  | 59.93 | 12.47 | 36.65 | 18.60 | 7.73  |
|     | 4 | 18.50 | 8.92  | 31.32 | 31.02 | 60.94 | 4.99  | 11.00 | 78.07 | 3.40  | 29.75 | 20.78 | 4.13  |
|     | 5 | 15.38 | 10.16 | 35.04 | 22.77 | 62.06 | 13.56 | 30.13 | 55.07 | 4.53  | 36.35 | 28.70 | 8.25  |
| JOR | 1 | 9.76  | 24.68 | 30.01 | 59.15 | 19.48 | 11.10 | 24.67 | 59.20 | 5.53  | 15.58 | 65.08 | 3.90  |
|     | 2 | 10.73 | 23.50 | 33.02 | 76.95 | 13.69 | 3.95  | 3.92  | 89.58 | 1.25  | 10.13 | 74.69 | 4.75  |
|     | 3 | 11.31 | 25.61 | 28.36 | 61.07 | 20.61 | 3.46  | 20.33 | 67.33 | 5.33  | 13.33 | 66.63 | 4.43  |
|     | 4 | 12.12 | 24.51 | 28.25 | 67.21 | 18.45 | 5.05  | 13.89 | 50.56 | 9.44  | 13.63 | 63.55 | 6.90  |
| MEX | 1 | 18.08 | 10.77 | 41.67 | 20.69 | 64.49 | 11.45 | 28.27 | 51.07 | 7.27  | 43.81 | 11.28 | 13.41 |
|     | 2 | 14.84 | 14.00 | 31.40 | 26.69 | 59.72 | 9.84  | 40.60 | 37.13 | 7.27  | 45.22 | 10.78 | 5.00  |
|     | 3 | 15.91 | 13.52 | 32.11 | 23.05 | 53.22 | 17.02 | 21.33 | 62.60 | 3.33  | 42.40 | 10.15 | 6.35  |
|     | 4 | 14.98 | 14.45 | 31.84 | 25.73 | 51.91 | 16.53 | 16.73 | 65.80 | 3.00  | 47.34 | 14.72 | 5.47  |
|     | 5 | 15.83 | 13.98 | 33.82 | 19.69 | 56.21 | 15.56 | 20.13 | 53.13 | 2.27  | 44.20 | 13.70 | 8.08  |
|     | 6 | 16.35 | 12.60 | 33.96 | 17.87 | 57.96 | 21.07 | 5.00  | 78.07 | 1.60  | 44.00 | 8.42  | 7.25  |
|     | 7 | 15.94 | 13.64 | 32.18 | 24.39 | 57.48 | 12.25 | 1.83  | 66.00 | 3.33  | 44.75 | 8.81  | 10.56 |
|     | 8 | 18.22 | 13.81 | 31.69 | 21.34 | 55.73 | 18.02 | 6.40  | 66.00 | 6.33  | 46.69 | 9.50  | 11.13 |
| MI  | 1 | 5.57  | 24.58 | 34.91 | 57.71 | 32.45 | 0.97  | 0.17  | 74.33 | 18.67 | 21.68 | 22.70 | 13.53 |
|     | 2 | 6.15  | 15.60 | 42.19 | 62.13 | 31.25 | 2.90  | 9.33  | 41.00 | 43.25 | 17.83 | 47.53 | 13.58 |
|     | 3 | 10.01 | 21.04 | 34.47 | 60.63 | 24.00 | 14.06 | 12.22 | 69.11 | 16.67 | 19.75 | 32.03 | 9.34  |
|     | 4 | 8.23  | 18.80 | 42.05 | 48.07 | 30.21 | 19.06 | 0.67  | 5.83  | 9.83  | 20.13 | 50.48 | 9.00  |
|     | 5 | 21.48 | 16.24 | 38.31 | 42.60 | 22.07 | 34.26 | 49.93 | 33.93 | 11.67 | 39.25 | 7.97  | 22.03 |

|    |    |       |       |       |       |       |       |       |       |       |       |       |       |
|----|----|-------|-------|-------|-------|-------|-------|-------|-------|-------|-------|-------|-------|
|    | 6  | 23.51 | 9.37  | 43.08 | 16.27 | 48.65 | 34.60 | 42.33 | 21.92 | 20.25 | 40.59 | 20.59 | 19.56 |
|    | 7  | 23.44 | 16.29 | 41.36 | 33.13 | 16.33 | 50.41 | 66.44 | 23.00 | 8.78  | 30.00 | 12.75 | 40.06 |
|    | 8  | 26.58 | 15.27 | 46.33 | 40.82 | 7.36  | 51.82 | 84.83 | 8.83  | 4.17  | 25.38 | 14.88 | 29.88 |
|    | 9  | 20.30 | 17.42 | 41.54 | 30.57 | 20.75 | 48.56 | 65.92 | 15.42 | 3.83  | 33.38 | 14.38 | 38.00 |
|    | 10 | 20.37 | 13.95 | 42.79 | 33.90 | 28.26 | 37.50 | 51.58 | 17.17 | 17.42 | 22.16 | 19.94 | 36.75 |
| QL | 1  | 15.24 | 13.84 | 35.21 | 36.90 | 49.98 | 11.53 | 32.80 | 50.00 | 14.93 | 48.17 | 22.71 | 6.00  |
|    | 2  | 14.60 | 19.18 | 35.86 | 52.73 | 45.24 | 0.85  | 33.08 | 48.67 | 8.67  | 42.56 | 20.19 | 17.50 |
|    | 3  | 15.13 | 18.13 | 36.09 | 73.53 | 21.46 | 3.01  | 40.27 | 22.07 | 33.20 | 35.00 | 20.43 | 13.50 |
|    | 4  | 15.96 | 20.03 | 32.39 | 53.94 | 43.73 | 1.09  | 28.75 | 56.25 | 11.92 | 24.50 | 15.78 | 14.22 |
|    | 5  | 12.38 | 22.79 | 36.56 | 54.07 | 42.14 | 2.32  | 30.25 | 52.08 | 14.75 | 43.83 | 15.23 | 8.70  |
|    | 6  | 13.99 | 16.05 | 35.19 | 74.80 | 21.67 | 1.42  | 32.07 | 44.73 | 12.20 | 45.35 | 9.33  | 15.68 |
| TA | 1  | 19.95 | 15.00 | 24.06 | 49.00 | 30.01 | 12.77 | 24.67 | 36.58 | 34.58 | 27.78 | 20.35 | 20.90 |
|    | 2  | 12.54 | 16.82 | 38.52 | 48.95 | 39.11 | 4.30  | 27.25 | 13.33 | 48.17 | 24.58 | 27.65 | 3.88  |
|    | 3  | 19.38 | 11.25 | 26.41 | 27.59 | 34.48 | 20.83 | 22.53 | 28.27 | 24.40 | 44.95 | 15.73 | 15.05 |
|    | 4  | 17.47 | 12.88 | 50.38 | 57.50 | 18.09 | 14.78 | 7.73  | 20.80 | 46.60 | 36.83 | 27.65 | 5.98  |
| WA | 1  | 10.37 | 18.26 | 37.02 | 52.69 | 31.56 | 2.04  | 2.92  | 71.00 | 19.08 | 10.03 | 24.53 | 6.88  |
|    | 2  | 8.19  | 35.06 | 32.79 | 48.73 | 14.00 | 8.63  | 3.67  | 86.44 | 7.22  | 16.33 | 53.83 | 3.96  |
|    | 3  | 7.88  | 24.90 | 37.48 | 66.02 | 10.42 | 1.22  | 0.93  | 75.33 | 11.07 | 27.15 | 32.85 | 5.43  |
|    | 4  | 8.78  | 25.74 | 35.38 | 71.59 | 11.86 | 6.60  | 3.33  | 39.67 | 30.00 | 28.68 | 38.23 | 4.73  |
|    | 5  | 11.44 | 21.90 | 41.12 | 60.74 | 29.27 | 6.85  | 15.27 | 14.93 | 15.93 | 46.00 | 24.93 | 3.18  |
|    | 6  | 13.41 | 25.32 | 37.22 | 82.88 | 10.72 | 3.54  | 23.67 | 52.67 | 12.33 | 45.60 | 20.43 | 3.53  |



**Table S5.** Correlations (Pearson) between the diversity of bacteria, fungi, protists and soil invertebrates across stages within each of the 16 studied chronosequences. See Appendix S1, Table S15 for the number of samples used within each chronosequence stage. Red and blue shading indicate significant ( $P \leq 0.05$ ) positive and negative correlations, respectively.

| Site | Group    | Parameter | Invertebrates | Protists | Fungi |
|------|----------|-----------|---------------|----------|-------|
| ALPS | Protists | r         | 0.651         |          |       |
|      |          | P value   | 0.001         |          |       |
|      |          | n         | 22            |          |       |
|      | Fungi    | r         | 0.468         | 0.802    |       |
|      |          | P value   | 0.058         | <0.001   |       |
|      |          | n         | 17            | 17       |       |
|      | Bacteria | r         | 0.263         | 0.658    | 0.761 |
|      |          | P value   | 0.249         | 0.001    | 0.001 |
|      |          | n         | 21            | 22       | 16    |
| AZ   | Protists | r         | 0.693         |          |       |
|      |          | P value   | 0.003         |          |       |
|      |          | n         | 16            |          |       |
|      | Fungi    | r         | 0.549         | 0.657    |       |
|      |          | P value   | 0.028         | 0.004    |       |
|      |          | n         | 16            | 17       |       |
|      | Bacteria | r         | 0.593         | 0.601    | 0.204 |
|      |          | P value   | 0.02          | 0.014    | 0.448 |
|      |          | n         | 15            | 16       | 16    |
| BOS  | Protists | r         | 0.336         |          |       |
|      |          | P value   | 0.285         |          |       |
|      |          | n         | 12            |          |       |
|      | Fungi    | r         | 0.388         | 0.869    |       |
|      |          | P value   | 0.212         | <0.001   |       |
|      |          | n         | 12            | 18       |       |
|      | Bacteria | r         | 0.324         | 0.256    | 0.481 |
|      |          | P value   | 0.305         | 0.305    | 0.043 |
|      |          | n         | 12            | 18       | 18    |
| BOV  | Protists | r         | 0.289         |          |       |
|      |          | P value   | 0.579         |          |       |
|      |          | n         | 6             |          |       |
|      | Fungi    | r         | 0.402         | 0.951    |       |
|      |          | P value   | 0.429         | 0.001    |       |
|      |          | n         | 6             | 7        |       |
|      | Bacteria | r         | -0.185        | 0.53     | 0.279 |
|      |          | P value   | 0.725         | 0.177    | 0.503 |
|      |          | n         | 6             | 8        | 8     |
| CAL  | Protists | r         | 0.602         |          |       |

|           |                 |                |        |        |        |
|-----------|-----------------|----------------|--------|--------|--------|
|           |                 | <b>P value</b> | 0.002  |        |        |
|           |                 | <b>n</b>       | 24     |        |        |
|           | <b>Fungi</b>    | <b>r</b>       | 0.587  | 0.827  |        |
|           |                 | <b>P value</b> | 0.004  | <0.001 |        |
|           |                 | <b>n</b>       | 22     | 23     |        |
|           | <b>Bacteria</b> | <b>r</b>       | 0.642  | 0.679  | 0.534  |
|           |                 | <b>P value</b> | 0.001  | <0.001 | 0.009  |
|           |                 | <b>n</b>       | 24     | 25     | 23     |
| <b>CH</b> | <b>Protists</b> | <b>r</b>       | 0.736  |        |        |
|           |                 | <b>P value</b> | <0.001 |        |        |
|           |                 | <b>n</b>       | 27     |        |        |
|           | <b>Fungi</b>    | <b>r</b>       | 0.407  | 0.591  |        |
|           |                 | <b>P value</b> | 0.035  | 0.001  |        |
|           |                 | <b>n</b>       | 27     | 27     |        |
|           | <b>Bacteria</b> | <b>r</b>       | 0.351  | 0.581  | 0.525  |
|           |                 | <b>P value</b> | 0.073  | 0.001  | 0.003  |
|           |                 | <b>n</b>       | 27     | 27     | 29     |
| <b>CI</b> | <b>Protists</b> | <b>r</b>       | 0.641  |        |        |
|           |                 | <b>P value</b> | 0.001  |        |        |
|           |                 | <b>n</b>       | 24     |        |        |
|           | <b>Fungi</b>    | <b>r</b>       | 0.792  | 0.831  |        |
|           |                 | <b>P value</b> | <0.001 | <0.001 |        |
|           |                 | <b>n</b>       | 26     | 27     |        |
|           | <b>Bacteria</b> | <b>r</b>       | 0.743  | 0.722  | 0.778  |
|           |                 | <b>P value</b> | <0.001 | <0.001 | <0.001 |
|           |                 | <b>n</b>       | 25     | 26     | 28     |
| <b>CO</b> | <b>Protists</b> | <b>r</b>       | 0.401  |        |        |
|           |                 | <b>P value</b> | 0.031  |        |        |
|           |                 | <b>n</b>       | 29     |        |        |
|           | <b>Fungi</b>    | <b>r</b>       | 0.156  | 0.422  |        |
|           |                 | <b>P value</b> | 0.427  | 0.022  |        |
|           |                 | <b>n</b>       | 28     | 29     |        |
|           | <b>Bacteria</b> | <b>r</b>       | 0.198  | 0.183  | 0.303  |
|           |                 | <b>P value</b> | 0.313  | 0.343  | 0.117  |
|           |                 | <b>n</b>       | 28     | 29     | 28     |
| <b>HA</b> | <b>Protists</b> | <b>r</b>       |        |        |        |
|           |                 | <b>P value</b> |        |        |        |
|           |                 | <b>n</b>       |        |        |        |
|           | <b>Fungi</b>    | <b>r</b>       | 0.388  |        |        |
|           |                 | <b>P value</b> | 0.212  |        |        |
|           |                 | <b>n</b>       | 12     |        |        |
|           | <b>Bacteria</b> | <b>r</b>       | 0.34   |        | 0.702  |
|           |                 | <b>P value</b> | 0.307  |        | 0.016  |

|     |          |         |        |        |        |
|-----|----------|---------|--------|--------|--------|
| ICE | Protists | n       | 11     |        | 11     |
|     |          | r       | 0.51   |        |        |
|     |          | P value | 0.009  |        |        |
|     | Fungi    | n       | 25     |        |        |
|     |          | r       | 0.737  | 0.712  |        |
|     |          | P value | <0.001 | <0.001 |        |
|     | Bacteria | n       | 23     | 23     |        |
|     |          | r       | 0.376  | 0.341  | 0.497  |
|     |          | P value | 0.064  | 0.095  | 0.016  |
| JOR | Protists | n       | 25     | 25     | 23     |
|     |          | r       | 0.671  |        |        |
|     |          | P value | 0.004  |        |        |
|     | Fungi    | n       | 16     |        |        |
|     |          | r       | 0.716  | 0.629  |        |
|     |          | P value | 0.002  | 0.004  |        |
|     | Bacteria | n       | 16     | 19     |        |
|     |          | r       | 0.538  | 0.699  | 0.734  |
|     |          | P value | 0.031  | 0.001  | <0.001 |
| MEX | Protists | n       | 16     | 19     | 19     |
|     |          | r       | 0.43   |        |        |
|     |          | P value | 0.016  |        |        |
|     | Fungi    | n       | 31     |        |        |
|     |          | r       | 0.368  | 0.643  |        |
|     |          | P value | 0.021  | <0.001 |        |
|     | Bacteria | n       | 39     | 31     |        |
|     |          | r       | 0.351  | 0.714  | 0.73   |
|     |          | P value | 0.031  | <0.001 | <0.001 |
| MI  | Protists | n       | 38     | 30     | 39     |
|     |          | r       | 0.011  |        |        |
|     |          | P value | 0.956  |        |        |
|     | Fungi    | n       | 26     |        |        |
|     |          | r       | 0.133  | 0.658  |        |
|     |          | P value | 0.462  | <0.001 |        |
|     | Bacteria | n       | 33     | 35     |        |
|     |          | r       | -0.448 | 0.541  | 0.526  |
|     |          | P value | 0.011  | 0.001  | <0.001 |
| QL  | Protists | n       | 31     | 34     | 46     |
|     |          | r       | 0.499  |        |        |
|     |          | P value | 0.011  |        |        |
|     | Fungi    | n       | 25     |        |        |
|     |          | r       | 0.232  | 0.41   |        |
|     |          | P value | 0.254  | 0.038  |        |
| n   | 26       | 26      |        |        |        |

|          |          |         |        |        |       |
|----------|----------|---------|--------|--------|-------|
| TA       | Bacteria | r       | -0.103 | 0.229  | 0.053 |
|          |          | P value | 0.61   | 0.26   | 0.793 |
|          |          | n       | 27     | 26     | 27    |
|          | Protists | r       | 0.405  |        |       |
|          |          | P value | 0.096  |        |       |
|          |          | n       | 18     |        |       |
|          | Fungi    | r       | 0.732  | 0.738  |       |
|          |          | P value | 0.001  | <0.001 |       |
|          |          | n       | 17     | 18     |       |
| WA       | Bacteria | r       | 0.524  | 0.51   | 0.633 |
|          |          | P value | 0.026  | 0.026  | 0.005 |
|          |          | n       | 18     | 19     | 18    |
|          | Protists | r       | 0.251  |        |       |
|          |          | P value | 0.248  |        |       |
|          |          | n       | 23     |        |       |
|          | Fungi    | r       | 0.579  | 0.674  |       |
|          |          | P value | 0.005  | <0.001 |       |
|          |          | n       | 22     | 26     |       |
| Bacteria | r        | -0.029  | 0.835  | 0.281  |       |
|          | P value  | 0.9     | <0.001 | 0.173  |       |
|          | n        | 22      | 27     | 25     |       |

**Table S6.** Correlations (Spearman) between the diversity of soil bacteria, fungi, protists and invertebrates with environmental predictors and belowground biodiversity within each of the 16 studied chronosequences included in this study. See Appendix S1, Table S15 for number of samples within each chronosequence stage. Red and blue shading indicate significant ( $P \leq 0.05$ ) positive and negative correlations, respectively.

|      | Group              | Parameter | Belowground diversity | Plant cover | pH     | Salinity | Clay+silt | Soil C | Soil P | CN     | NP     |
|------|--------------------|-----------|-----------------------|-------------|--------|----------|-----------|--------|--------|--------|--------|
|      |                    |           |                       |             |        |          |           |        |        |        |        |
| ALPS | Bacteria           | $\rho$    | 0.635                 | 0.497       | -0.005 | -0.342   | 0.173     | -0.049 | -0.002 | -0.320 | 0.003  |
|      |                    | P-value   | 0.008                 | 0.019       | 0.984  | 0.119    | 0.442     | 0.828  | .992   | 0.146  | 0.988  |
|      |                    | n         | 16                    | 22          | 22     | 22       | 22        | 22     | 22     | 22     | 22     |
|      | Fungi              | $\rho$    | 0.829                 | 0.448       | 0.118  | 0.203    | -0.14     | -0.067 | 0.203  | -0.483 | -0.044 |
|      |                    | P-value   | <0.001                | 0.071       | 0.653  | 0.434    | 0.591     | 0.797  | 0.434  | 0.050  | .866   |
|      |                    | n         | 16                    | 17          | 17     | 17       | 17        | 17     | 22     | 17     | 17     |
|      | Protists           | $\rho$    | 0.941                 | 0.63        | -0.282 | -0.095   | -0.134    | 0.358  | 0.452  | -0.388 | 0.425  |
|      |                    | P-value   | <0.001                | 0.001       | 0.192  | 0.665    | 0.541     | 0.093  | 0.031  | 0.067  | 0.043  |
|      |                    | n         | 16                    | 23          | 23     | 23       | 23        | 23     | 22     | 23     | 23     |
|      | Invertebrates      | $\rho$    | 0.798                 | 0.474       | -0.549 | 0.096    | 0.122     | 0.639  | 0.659  | -0.542 | 0.692  |
|      |                    | P-value   | <0.001                | 0.026       | 0.008  | 0.672    | 0.587     | 0.001  | 0.001  | 0.009  | <0.001 |
|      |                    | n         | 16                    | 22          | 22     | 22       | 22        | 22     | 22     | 22     | 22     |
| AZ   | Bacteria           | $\rho$    | 0.564                 | 0.396       | -0.019 | 0.53     | 0.396     | 0.489  | 0.421  | -0.011 | 0.553  |
|      |                    | P-value   | 0.028                 | 0.094       | 0.937  | 0.02     | 0.094     | 0.033  | 0.073  | 0.966  | 0.014  |
|      |                    | n         | 15                    | 19          | 19     | 19       | 19        | 19     | 19     | 19     | 19     |
|      | Fungi              | $\rho$    | 0.575                 | 0.524       | 0.056  | 0.191    | 0.25      | 0.127  | 0.137  | -0.255 | 0.140  |
|      |                    | P-value   | 0.025                 | 0.031       | 0.830  | 0.462    | 0.332     | 0.626  | 0.599  | 0.323  | 0.593  |
|      |                    | n         | 15                    | 17          | 17     | 17       | 17        | 17     | 17     | 17     | 17     |
|      | Protists           | $\rho$    | 0.786                 | 0.422       | 0.096  | 0.712    | 0.57      | 0.703  | 0.758  | 0.224  | 0.704  |
|      |                    | P-value   | 0.001                 | 0.092       | 0.714  | 0.001    | 0.017     | 0.002  | 0      | 0.388  | 0.002  |
|      |                    | n         | 15                    | 17          | 17     | 17       | 17        | 17     | 17     | 17     | 17     |
|      | Soil invertebrates | $\rho$    | 0.941                 | 0.427       | 0.209  | 0.597    | 0.523     | 0.562  | 0.42   | 0.209  | 0.637  |
|      |                    | P-value   | <0.001                | 0.099       | 0.436  | 0.015    | 0.037     | 0.024  | 0.105  | 0.437  | 0.008  |
|      |                    | n         | 15                    | 16          | 16     | 16       | 16        | 16     | 16     | 16     | 16     |
| BOS  | Bacteria           | $\rho$    | 0.678                 | 0.337       | 0.105  | -0.133   | 0.027     | -0.125 | 0.125  | -0.509 | -0.032 |
|      |                    | P-value   | 0.015                 | 0.146       | 0.661  | 0.576    | 0.91      | 0.6    | 0.6    | 0.022  | 0.895  |
|      |                    | n         | 12                    | 20          | 20     | 20       | 20        | 20     | 20     | 20     | 20     |
|      | Fungi              | $\rho$    | 0.883                 | 0.381       | -0.477 | -0.376   | 0.338     | 0.537  | 0.463  | -0.310 | 0.491  |
|      |                    | P-value   | <0.001                | 0.119       | 0.045  | 0.124    | 0.17      | 0.022  | 0.053  | 0.211  | 0.038  |
|      |                    | n         | 12                    | 18          | 18     | 18       | 18        | 18     | 18     | 18     | 18     |
|      | Protists           | $\rho$    | 0.86                  | 0.369       | -0.511 | -0.444   | 0.365     | 0.607  | 0.381  | -0.125 | 0.518  |
|      |                    | P-value   | <0.001                | 0.131       | 0.03   | 0.065    | 0.136     | 0.008  | 0.119  | 0.621  | 0.028  |
|      |                    | n         | 12                    | 18          | 18     | 18       | 18        | 18     | 18     | 18     | 18     |
|      | Soil invertebrates | $\rho$    | 0.575                 | -0.121      | -0.395 | -0.425   | -0.329    | 0.007  | 0.414  | 0.158  | 0.281  |
|      |                    | P-value   | 0.05                  | 0.709       | 0.203  | 0.169    | 0.297     | 0.983  | 0.181  | 0.624  | 0.377  |

|            |                    |         |        |        |        |        |        |        |        |        |        |
|------------|--------------------|---------|--------|--------|--------|--------|--------|--------|--------|--------|--------|
| <b>BOV</b> | Bacteria           | n       | 12     | 12     | 12     | 12     | 12     | 12     | 12     | 12     | 12     |
|            |                    | $\rho$  | 0.886  | -0.719 | -0.067 | 0.4    | -0.546 | -0.433 | -0.55  | -0.800 | -0.283 |
|            |                    | P-value | 0.019  | 0.029  | 0.865  | 0.286  | 0.128  | 0.244  | 0.125  | 0.010  | 0.460  |
|            | Fungi              | n       | 6      | 9      | 9      | 9      | 9      | 9      | 9      | 9      | 9      |
|            |                    | $\rho$  | 0.754  | -0.353 | -0.539 | 0.371  | 0.113  | -0.743 | -0.287 | -0.431 | -0.060 |
|            |                    | P-value | 0.084  | 0.392  | 0.168  | 0.365  | 0.789  | 0.035  | 0.49   | 0.286  | 0.888  |
|            | Protists           | n       | 6      | 8      | 8      | 8      | 8      | 8      | 8      | 8      | 8      |
|            |                    | $\rho$  | 0.886  | -0.704 | -0.524 | 0.333  | -0.309 | -0.714 | -0.476 | -0.595 | -0.357 |
|            |                    | P-value | 0.019  | 0.051  | 0.183  | 0.420  | 0.457  | 0.047  | 0.233  | 0.120  | 0.385  |
|            | Soil invertebrates | n       | 6      | 8      | 8      | 8      | 8      | 8      | 8      | 8      | 8      |
|            |                    | $\rho$  | 0.334  | 0.097  | -0.482 | 0.00   | -0.447 | -0.704 | 0.037  | 0.037  | -0.927 |
|            |                    | P-value | 0.518  | 0.836  | 0.274  | 1.00   | 0.315  | 0.077  | 0.937  | 0.937  | 0.003  |
| <b>CAL</b> | Bacteria           | n       | 6      | 7      | 7      | 7      | 7      | 7      | 7      | 7      | 7      |
|            |                    | $\rho$  | 0.955  | 0.139  | 0.861  | -0.115 | -0.184 | 0.273  | 0.493  | 0.312  | 0.052  |
|            |                    | P-value | <0.001 | 0.509  | <0.001 | 0.585  | 0.378  | 0.186  | 0.012  | 0.129  | 0.804  |
|            | Fungi              | n       | 21     | 25     | 25     | 25     | 25     | 25     | 25     | 25     | 25     |
|            |                    | $\rho$  | 0.645  | 0.214  | 0.734  | 0.307  | 0.077  | 0.272  | 0.693  | 0.328  | -0.177 |
|            |                    | P-value | 0.002  | 0.327  | <0.001 | 0.154  | 0.728  | 0.209  | <0.001 | 0.127  | 0.418  |
|            | Protists           | n       | 21     | 23     | 23     | 23     | 23     | 23     | 23     | 23     | 23     |
|            |                    | $\rho$  | 0.848  | 0.042  | 0.732  | 0.17   | 0.051  | 0.266  | 0.546  | 0.241  | -0.047 |
|            |                    | P-value | <0.001 | 0.843  | <0.001 | 0.415  | 0.809  | 0.199  | 0.005  | 0.245  | 0.825  |
|            | Soil invertebrates | n       | 21     | 25     | 25     | 25     | 25     | 25     | 25     | 25     | 25     |
|            |                    | $\rho$  | 0.774  | -0.121 | 0.591  | -0.204 | -0.243 | 0.382  | 0.231  | 0.039  | 0.301  |
|            |                    | P-value | <0.001 | 0.572  | 0.002  | 0.338  | 0.252  | 0.065  | 0.278  | 0.856  | 0.152  |
| <b>CH</b>  | Bacteria           | n       | 21     | 24     | 24     | 24     | 24     | 24     | 24     | 24     | 24     |
|            |                    | $\rho$  | 0.668  | 0.363  | -0.08  | 0.31   | 0.131  | 0.141  | 0.175  | -0.303 | 0.287  |
|            |                    | P-value | <0.001 | 0.053  | 0.68   | 0.102  | 0.497  | 0.466  | 0.364  | 0.110  | 0.132  |
|            | Fungi              | n       | 27     | 29     | 29     | 29     | 29     | 29     | 29     | 29     | 29     |
|            |                    | $\rho$  | 0.733  | 0.414  | -0.368 | 0.439  | -0.039 | 0.398  | 0.369  | -0.222 | 0.468  |
|            |                    | P-value | <0.001 | 0.025  | 0.049  | 0.017  | 0.84   | 0.032  | 0.049  | 0.248  | 0.011  |
|            | Protists           | n       | 27     | 29     | 29     | 29     | 29     | 29     | 29     | 29     | 29     |
|            |                    | $\rho$  | 0.845  | 0.431  | -0.581 | 0.544  | 0.003  | 0.458  | 0.446  | -0.337 | 0.413  |
|            |                    | P-value | <0.001 | 0.025  | 0.001  | 0.003  | 0.989  | 0.016  | 0.02   | 0.085  | 0.032  |
|            | Soil invertebrates | n       | 27     | 27     | 27     | 27     | 27     | 27     | 27     | 27     | 27     |
|            |                    | $\rho$  | 0.715  | 0.584  | -0.554 | 0.593  | -0.067 | 0.55   | 0.505  | -0.204 | 0.480  |
|            |                    | P-value | <0.001 | 0.001  | 0.003  | 0.001  | 0.74   | 0.003  | 0.007  | 0.307  | 0.011  |
| <b>CI</b>  | Bacteria           | n       | 27     | 27     | 27     | 27     | 27     | 27     | 27     | 27     | 27     |
|            |                    | $\rho$  | 0.897  | 0.577  | -0.098 | 0.509  | 0.036  | 0.306  | 0.298  | -0.190 | 0.273  |
|            |                    | P-value | <0.001 | 0.001  | 0.614  | 0.005  | 0.854  | 0.107  | 0.117  | 0.323  | 0.152  |
|            | Fungi              | n       | 23     | 29     | 29     | 29     | 29     | 29     | 29     | 29     | 29     |
|            |                    | $\rho$  | 0.89   | 0.613  | -0.225 | 0.482  | -0.006 | 0.397  | 0.343  | -0.350 | 0.394  |
|            |                    | P-value | <0.001 | <0.001 | 0.241  | 0.008  | 0.976  | 0.033  | 0.068  | 0.063  | 0.034  |

|                    |                    |         |        |        |        |        |        |        |        |        |        |
|--------------------|--------------------|---------|--------|--------|--------|--------|--------|--------|--------|--------|--------|
| <b>CO</b>          | Protists           | n       | 23     | 29     | 29     | 29     | 29     | 29     | 29     | 29     | 29     |
|                    |                    | $\rho$  | 0.778  | 0.766  | -0.361 | 0.784  | 0.325  | 0.674  | 0.536  | -0.312 | 0.636  |
|                    |                    | P-value | <0.001 | <0.001 | 0.064  | 0      | 0.098  | 0      | 0.004  | 0.113  | <0.001 |
|                    | Soil invertebrates | n       | 23     | 27     | 27     | 27     | 27     | 27     | 27     | 27     | 27     |
|                    |                    | $\rho$  | 0.846  | 0.466  | -0.029 | 0.42   | -0.154 | 0.251  | 0.232  | -0.161 | 0.127  |
|                    |                    | P-value | <0.001 | 0.016  | 0.887  | 0.033  | 0.454  | 0.215  | 0.255  | 0.432  | 0.535  |
|                    | Bacteria           | n       | 23     | 26     | 26     | 26     | 26     | 26     | 26     | 26     | 26     |
|                    |                    | $\rho$  | 0.477  | -0.303 | 0.217  | 0.115  | 0.387  | -0.074 | -0.125 | 0.094  | 0.081  |
|                    |                    | P-value | 0.012  | 0.11   | 0.259  | 0.552  | 0.038  | 0.704  | 0.518  | 0.629  | 0.675  |
|                    | Fungi              | n       | 27     | 29     | 29     | 29     | 29     | 29     | 29     | 29     | 29     |
|                    |                    | $\rho$  | 0.609  | -0.402 | 0.052  | -0.076 | -0.125 | -0.244 | -0.229 | -0.136 | -0.125 |
|                    |                    | P-value | 0.001  | 0.031  | 0.788  | 0.694  | 0.518  | 0.201  | 0.232  | 0.481  | 0.518  |
| Protists           | n                  | 27      | 29     | 29     | 29     | 29     | 29     | 29     | 29     | 29     |        |
|                    | $\rho$             | 0.803   | -0.55  | -0.253 | 0.093  | -0.042 | 0.085  | -0.036 | 0.011  | 0.244  |        |
|                    | P-value            | <0.001  | 0.002  | 0.177  | 0.627  | 0.827  | 0.656  | 0.849  | 0.953  | 0.194  |        |
| Soil invertebrates | n                  | 27      | 30     | 30     | 30     | 30     | 30     | 30     | 30     | 30     |        |
|                    | $\rho$             | 0.825   | -0.477 | -0.101 | 0.075  | -0.266 | 0.194  | -0.109 | -0.044 | 0.264  |        |
|                    | P-value            | <0.001  | 0.009  | 0.601  | 0.698  | 0.162  | 0.312  | 0.575  | 0.821  | 0.167  |        |
| Bacteria           | n                  | 27      | 29     | 29     | 29     | 29     | 29     | 29     | 29     | 29     |        |
|                    | $\rho$             | 0.809   | -0.198 | 0.61   | -0.522 | -0.57  | -0.512 | -0.593 | -0.297 | -0.198 |        |
|                    | P-value            | 0.003   | 0.518  | 0.027  | 0.067  | 0.042  | 0.074  | 0.033  | 0.325  | 0.517  |        |
| Fungi              | n                  | 11      | 13     | 13     | 13     | 13     | 13     | 13     | 13     | 13     |        |
|                    | $\rho$             | 0.527   | -0.349 | 0.503  | -0.266 | -0.524 | -0.49  | -0.594 | -0.462 | 0.119  |        |
|                    | P-value            | 0.096   | 0.266  | 0.095  | 0.404  | 0.080  | 0.106  | 0.042  | 0.131  | 0.713  |        |
| Soil invertebrates | n                  | 11      | 12     | 12     | 12     | 12     | 12     | 12     | 12     | 12     |        |
|                    | $\rho$             | 0.465   | 0.242  | -0.106 | 0.155  | -0.022 | 0.067  | 0.12   | 0.303  | 0.514  |        |
|                    | P-value            | 0.15    | 0.449  | 0.744  | 0.631  | 0.946  | 0.836  | 0.711  | 0.339  | 0.087  |        |
| Bacteria           | n                  | 11      | 12     | 12     | 12     | 12     | 12     | 12     | 12     | 12     |        |
|                    | $\rho$             | 0.758   | 0.541  | 0.108  | 0.272  | 0.047  | -0.14  | -0.197 | -0.333 | 0.278  |        |
|                    | P-value            | <0.001  | 0.005  | 0.607  | 0.189  | 0.823  | 0.504  | 0.345  | 0.104  | 0.179  |        |
| Fungi              | n                  | 23      | 25     | 25     | 25     | 25     | 25     | 25     | 25     | 25     |        |
|                    | $\rho$             | 0.914   | 0.565  | 0.123  | 0.304  | 0.169  | 0.009  | -0.089 | -0.291 | 0.377  |        |
|                    | P-value            | <0.001  | 0.005  | 0.575  | 0.159  | 0.442  | 0.968  | 0.686  | 0.178  | 0.076  |        |
| Protists           | n                  | 23      | 23     | 23     | 23     | 23     | 23     | 23     | 23     | 23     |        |
|                    | $\rho$             | 0.677   | 0.292  | 0.102  | 0.261  | 0.292  | -0.005 | 0.002  | -0.144 | 0.358  |        |
|                    | P-value            | <0.001  | 0.156  | 0.629  | 0.208  | 0.156  | 0.983  | 0.994  | 0.492  | 0.079  |        |
| Soil invertebrates | n                  | 23      | 25     | 25     | 25     | 25     | 25     | 25     | 25     | 25     |        |
|                    | $\rho$             | 0.773   | 0.367  | -0.01  | 0.37   | 0.092  | -0.191 | 0.303  | -0.501 | 0.337  |        |
|                    | P-value            | <0.001  | 0.071  | 0.962  | 0.068  | 0.661  | 0.361  | 0.141  | 0.011  | 0.100  |        |
| Bacteria           | n                  | 23      | 25     | 25     | 25     | 25     | 25     | 25     | 25     | 25     |        |
|                    | $\rho$             | 0.603   | -0.558 | -0.258 | -0.153 | 0.558  | 0.105  | -0.095 | 0.179  | -0.129 |        |
|                    | P-value            | 0.013   | 0.01   | 0.271  | 0.519  | 0.01   | 0.658  | 0.691  | 0.450  | 0.587  |        |

|            |                    |         |       |        |        |        |        |        |        |        |
|------------|--------------------|---------|-------|--------|--------|--------|--------|--------|--------|--------|
|            |                    | n       | 16    | 20     | 20     | 20     | 20     | 20     | 20     | 20     |
|            | Fungi              | $\rho$  | 0.765 | -0.322 | -0.425 | -0.514 | 0.322  | -0.061 | -0.058 | 0.526  |
|            |                    | P-value | 0.001 | 0.178  | 0.07   | 0.024  | 0.178  | 0.805  | 0.813  | 0.021  |
|            |                    | n       | 16    | 19     | 19     | 19     | 19     | 19     | 19     | 19     |
|            | Protists           | $\rho$  | 0.709 | -0.122 | -0.431 | -0.085 | 0.122  | 0.113  | 0.183  | 0.259  |
|            |                    | P-value | 0.002 | 0.618  | 0.065  | 0.729  | 0.618  | 0.646  | 0.452  | 0.285  |
|            |                    | n       | 16    | 19     | 19     | 19     | 19     | 19     | 19     | 19     |
|            | Soil invertebrates | $\rho$  | 0.871 | -0.26  | -0.426 | -0.227 | 0.26   | 0.221  | 0.141  | 0.357  |
|            |                    | P-value | 0     | 0.331  | 0.1    | 0.397  | 0.331  | 0.411  | 0.602  | 0.175  |
|            |                    | n       | 16    | 16     | 16     | 16     | 16     | 16     | 16     | 16     |
| <b>MEX</b> | Bacteria           | $\rho$  | 0.791 | 0.259  | 0.405  | 0.348  | 0.147  | 0.177  | 0.523  | -0.163 |
|            |                    | P-value | 0     | 0.112  | 0.011  | 0.03   | 0.37   | 0.28   | 0.001  | 0.322  |
|            |                    | n       | 30    | 39     | 39     | 39     | 39     | 39     | 39     | 39     |
|            | Fungi              | $\rho$  | 0.778 | 0.154  | 0.408  | 0.215  | 0.122  | 0.096  | 0.229  | -0.089 |
|            |                    | P-value | 0     | 0.342  | 0.009  | 0.183  | 0.452  | 0.554  | 0.155  | 0.586  |
|            |                    | n       | 30    | 40     | 40     | 40     | 40     | 40     | 40     | 40     |
|            | Protists           | $\rho$  | 0.784 | 0.571  | 0.511  | 0.276  | 0.332  | 0.275  | 0.486  | 0.049  |
|            |                    | P-value | 0     | 0.001  | 0.003  | 0.134  | 0.068  | 0.134  | 0.006  | 0.794  |
|            |                    | n       | 30    | 31     | 31     | 31     | 31     | 31     | 31     | 31     |
|            | Soil invertebrates | $\rho$  | 0.718 | -0.189 | 0.127  | 0.098  | 0.063  | 0.005  | 0.238  | -0.196 |
|            |                    | P-value | 0     | 0.248  | 0.442  | 0.553  | 0.702  | 0.978  | 0.144  | 0.231  |
|            |                    | n       | 30    | 39     | 39     | 39     | 39     | 39     | 39     | 39     |
| <b>MI</b>  | Bacteria           | $\rho$  | 0.816 | -0.432 | 0.698  | 0.431  | -0.159 | -0.409 | -0.359 | -0.507 |
|            |                    | P-value | 0     | 0.002  | 0      | 0.002  | 0.282  | 0.004  | 0.120  | <0.001 |
|            |                    | n       | 25    | 48     | 48     | 48     | 48     | 48     | 48     | 48     |
|            | Fungi              | $\rho$  | 0.827 | -0.323 | 0.672  | 0.495  | -0.341 | -0.401 | -0.298 | -0.535 |
|            |                    | P-value | 0     | 0.025  | 0      | 0      | 0.018  | 0.005  | 0.040  | <0.001 |
|            |                    | n       | 25    | 48     | 48     | 48     | 48     | 48     | 48     | 48     |
|            | Protists           | $\rho$  | 0.791 | -0.016 | 0.335  | 0.159  | -0.045 | 0.003  | 0.141  | -0.048 |
|            |                    | P-value | 0     | 0.926  | 0.049  | 0.363  | 0.798  | 0.988  | 0.419  | 0.786  |
|            |                    | n       | 25    | 35     | 35     | 35     | 35     | 35     | 35     | 35     |
|            | Soil invertebrates | $\rho$  | 0.014 | -0.01  | -0.248 | -0.526 | 0.112  | 0.235  | 0.169  | 0.329  |
|            |                    | P-value | 0.946 | 0.956  | 0.165  | 0.002  | 0.536  | 0.188  | 0.347  | 0.061  |
|            |                    | n       | 25    | 33     | 33     | 33     | 33     | 33     | 33     | 33     |
| <b>QL</b>  | Bacteria           | $\rho$  | 0.595 | 0.02   | 0.672  | -0.222 | 0.529  | -0.41  | -0.280 | -0.221 |
|            |                    | P-value | 0.002 | 0.919  | 0      | 0.247  | 0.003  | 0.027  | 0.141  | 0.249  |
|            |                    | n       | 25    | 29     | 29     | 29     | 29     | 29     | 29     | 29     |
|            | Fungi              | $\rho$  | 0.599 | -0.111 | 0.157  | -0.147 | 0.147  | -0.08  | -0.067 | 0.170  |
|            |                    | P-value | 0.002 | 0.58   | 0.436  | 0.463  | 0.465  | 0.693  | 0.738  | 0.397  |
|            |                    | n       | 25    | 27     | 27     | 27     | 27     | 27     | 29     | 27     |
|            | Protists           | $\rho$  | 0.667 | -0.134 | 0.463  | -0.036 | 0.336  | 0.019  | -0.065 | 0.014  |
|            |                    | P-value | 0     | 0.515  | 0.017  | 0.86   | 0.093  | 0.925  | 0.754  | 0.947  |





**Table S7.** Summary for the best models predicting the relationship between selected stage and belowground biodiversity for 16 studied chronosequences. Models are ranked by significance, AICc and parsimony. AICc measures the relative goodness of fit of a given model; the lower its value, the more likely the model is correct.  $\Delta AIC_c$  denotes the difference between the AICc of each model and that of the best model.

| Diversity                | Soil      | Model     | R <sup>2</sup> | P value | AICc   | DeltaAICc    | Selected Model |
|--------------------------|-----------|-----------|----------------|---------|--------|--------------|----------------|
| Belowground biodiversity | ALPS      | Linear    | 0.12           | 0.031   | -12.00 | 6.46         |                |
|                          |           | Quadratic | 0.53           | 0.001   | -18.46 | 0.00         | ✓              |
|                          |           | Cubic     | 0.54           | 0.006   | -14.44 | 4.02         |                |
|                          | AZ        | Linear    | 0.28           | 0.012   | -21.56 | 4.15         |                |
|                          |           | Quadratic | 0.58           | 0.001   | -25.71 | 0.00         | ✓              |
|                          |           | Cubic     | 0.58           | 0.002   | -21.19 | 4.51         |                |
|                          | BOS       | Linear    | 0.35           | 0.038   | -19.92 | 0.00         | ✓              |
|                          |           | Quadratic | 0.39           | 0.078   |        |              |                |
|                          | BOV       | Cubic     | 0.65           | 0.035   | -16.17 | 3.76         |                |
|                          |           | Linear    | 0.53           | 0.154   |        |              |                |
|                          |           | Quadratic | 0.82           | 0.074   |        |              |                |
|                          | CAL       | Cubic     | 0.92           | <0.001  |        |              | ✓              |
|                          |           | Linear    | 0.01           | 0.737   |        |              |                |
|                          |           | Quadratic | 0.56           | 0.000   | -43.80 | 1.24         | ✓              |
|                          | CH        | Cubic     | 0.65           | <0.001  | -45.04 | 0.00         |                |
|                          |           | Linear    | 0.32           | 0.003   | -41.16 | 0.00         | ✓              |
|                          |           | Quadratic | 0.35           | 0.010   | -39.34 | 1.82         |                |
|                          | CI        | Cubic     | 0.35           | 0.031   | -36.39 | 4.78         |                |
| Linear                   |           | 0.10      | 0.401          |         |        |              |                |
| Quadratic                |           | 0.27      | 0.017          | -5.70   | 0.00   | ✓            |                |
| CO                       | Cubic     | 0.27      | 0.013          | -2.40   | 3.31   |              |                |
|                          | Linear    | 0.04      | 0.273          |         |        |              |                |
|                          | Quadratic | 0.07      | 0.510          |         |        |              |                |
| HA                       | Cubic     | 0.47      | 0.004          |         |        | ✓            |                |
|                          | Linear    | 0.06      | 0.504          |         |        |              |                |
|                          | Quadratic | 0.39      | 0.135          |         |        | Undetermined |                |
|                          |           | Cubic     | 0.39           | 0.291   |        |              |                |

|                 |             |                  |      |       |        |      |              |
|-----------------|-------------|------------------|------|-------|--------|------|--------------|
|                 | <b>ICE</b>  | <b>Linear</b>    | 0.21 | 0.013 | -42.73 | 0.00 | ✓            |
|                 |             | <b>Quadratic</b> | 0.22 | 0.027 | -39.86 | 2.88 |              |
|                 |             | <b>Cubic</b>     | 0.22 | 0.050 | -36.69 | 6.04 |              |
|                 | <b>JOR</b>  | <b>Linear</b>    | 0.07 | 0.070 |        |      |              |
|                 |             | <b>Quadratic</b> | 0.09 | 0.018 | -21.03 | 0.00 | ✓            |
|                 |             | <b>Cubic</b>     | 0.24 | 0.031 | -19.45 | 1.58 |              |
|                 | <b>MEX</b>  | <b>Linear</b>    | 0.10 | 0.121 |        |      |              |
|                 |             | <b>Quadratic</b> | 0.30 | 0.073 |        |      |              |
|                 |             | <b>Cubic</b>     | 0.34 | 0.006 |        |      | ✓            |
|                 | <b>MI</b>   | <b>Linear</b>    | 0.16 | 0.033 | -42.31 | 1.34 | ✓            |
|                 |             | <b>Quadratic</b> | 0.18 | 0.113 |        |      |              |
|                 |             | <b>Cubic</b>     | 0.38 | 0.006 | -43.66 | 0.00 |              |
|                 | <b>QL</b>   | <b>Linear</b>    | 0.22 | 0.033 | -55.10 | 4.68 |              |
|                 |             | <b>Quadratic</b> | 0.31 | 0.020 | -55.33 | 4.45 |              |
|                 |             | <b>Cubic</b>     | 0.49 | 0.000 | -59.78 | 0.00 | ✓            |
|                 | <b>TA</b>   | <b>Linear</b>    | 0.01 | 0.708 |        |      |              |
|                 |             | <b>Quadratic</b> | 0.33 | 0.028 |        |      | ✓            |
|                 |             | <b>Cubic</b>     | 0.41 | 0.093 |        |      |              |
|                 | <b>WA</b>   | <b>Linear</b>    | 0.15 | 0.350 |        |      |              |
|                 |             | <b>Quadratic</b> | 0.25 | 0.138 |        |      |              |
|                 |             | <b>Cubic</b>     | 0.30 | 0.047 |        |      | ✓            |
| <b>Bacteria</b> | <b>ALPS</b> | <b>Linear</b>    | 0.01 | 0.343 |        |      |              |
|                 |             | <b>Quadratic</b> | 0.49 | 0.002 | 313.92 | 0.00 | ✓            |
|                 |             | <b>Cubic</b>     | 0.49 | 0.006 | 317.19 | 3.27 |              |
|                 | <b>AZ</b>   | <b>Linear</b>    | 0.05 | 0.040 | 284.93 | 0.00 | ✓            |
|                 |             | <b>Quadratic</b> | 0.19 | 0.000 | 284.98 | 0.05 |              |
|                 |             | <b>Cubic</b>     | 0.25 | 0.001 | 287.27 | 2.34 |              |
|                 | <b>BOS</b>  | <b>Linear</b>    | 0.00 | 0.733 |        |      |              |
|                 |             | <b>Quadratic</b> | 0.00 | 0.799 |        |      | Undetermined |
|                 |             | <b>Cubic</b>     | 0.35 | 0.245 |        |      |              |
|                 | <b>BOV</b>  | <b>Linear</b>    | 0.75 | 0.003 | 141.83 | 0.00 | ✓            |
|                 |             | <b>Quadratic</b> | 0.75 | 0.020 | 148.89 | 7.06 |              |
|                 |             | <b>Cubic</b>     | 0.78 | 0.073 |        |      |              |
|                 | <b>CAL</b>  | <b>Linear</b>    | 0.35 | 0.351 |        |      |              |

|  |            |                  |      |        |        |       |              |
|--|------------|------------------|------|--------|--------|-------|--------------|
|  |            | <b>Quadratic</b> | 0.37 | 0.005  | 350.26 | 0.00  | ✓            |
|  |            | <b>Cubic</b>     | 0.44 | 0.004  | 350.41 | 0.15  |              |
|  | <b>CH</b>  | <b>Linear</b>    | 0.10 | 0.231  |        |       |              |
|  |            | <b>Quadratic</b> | 0.10 | 0.347  |        |       | Undetermined |
|  | <b>CI</b>  | <b>Cubic</b>     | 0.11 | 0.602  |        |       |              |
|  |            | <b>Linear</b>    | 0.13 | 0.127  |        |       |              |
|  | <b>CO</b>  | <b>Quadratic</b> | 0.19 | 0.034  | 443.56 | 0.00  | ✓            |
|  |            | <b>Cubic</b>     | 0.19 | 0.045  | 446.49 | 2.93  |              |
|  |            | <b>Linear</b>    | 0.19 | 0.039  | 365.35 | 4.42  |              |
|  | <b>HA</b>  | <b>Quadratic</b> | 0.19 | 0.152  |        |       |              |
|  |            | <b>Cubic</b>     | 0.43 | 0.002  | 360.93 | 0.00  | ✓            |
|  |            | <b>Linear</b>    | 0.01 | 0.715  |        |       |              |
|  | <b>ICE</b> | <b>Quadratic</b> | 0.55 | 0.002  |        |       | ✓            |
|  |            | <b>Cubic</b>     | 0.57 | 0.089  |        |       |              |
|  |            | <b>Linear</b>    | 0.22 | 0.023  | 352.73 | 0.00  | ✓            |
|  | <b>JOR</b> | <b>Quadratic</b> | 0.24 | 0.065  |        |       |              |
|  |            | <b>Cubic</b>     | 0.26 | 0.173  |        |       |              |
|  |            | <b>Linear</b>    | 0.02 | 0.293  |        |       |              |
|  |            | <b>Quadratic</b> | 0.03 | 0.506  |        |       | Undetermined |
|  | <b>MEX</b> | <b>Cubic</b>     | 0.33 | 0.176  |        |       |              |
|  |            | <b>Linear</b>    | 0.01 | 0.817  |        |       |              |
|  |            | <b>Quadratic</b> | 0.29 | 0.006  | 521.24 | 2.52  |              |
|  | <b>MI</b>  | <b>Cubic</b>     | 0.37 | 0.000  | 518.72 | 0.00  | ✓            |
|  |            | <b>Linear</b>    | 0.19 | 0.001  | 730.17 | 8.65  |              |
|  |            | <b>Quadratic</b> | 0.20 | 0.003  | 732.08 | 10.55 |              |
|  | <b>QL</b>  | <b>Cubic</b>     | 0.39 | <0.001 | 721.52 | 0.00  | ✓            |
|  |            | <b>Linear</b>    | 0.25 | 0.005  | 421.03 | 1.44  | ✓            |
|  |            | <b>Quadratic</b> | 0.31 | 0.006  | 421.22 | 1.63  |              |
|  |            | <b>Cubic</b>     | 0.41 | 0.001  | 419.59 | 0.00  |              |
|  | <b>TA</b>  | <b>Linear</b>    | 0.02 | 0.946  |        |       |              |
|  |            | <b>Quadratic</b> | 0.25 | 0.052  |        |       | ✓            |
|  | <b>WA</b>  | <b>Cubic</b>     | 0.26 | 0.078  |        |       |              |
|  |            | <b>Linear</b>    | 0.12 | 0.152  |        |       |              |
|  |            | <b>Quadratic</b> | 0.37 | 0.001  | 395.18 | 0.00  | ✓            |

|              |             |                  |      |       |        |      |              |   |
|--------------|-------------|------------------|------|-------|--------|------|--------------|---|
|              |             | <b>Cubic</b>     | 0.38 | 0.003 | 397.73 | 2.55 |              |   |
| <b>Fungi</b> | <b>ALPS</b> | <b>Linear</b>    | 0.04 | 0.524 |        |      | Undetermined |   |
|              |             | <b>Quadratic</b> | 0.32 | 0.070 |        |      |              |   |
|              | <b>AZ</b>   | <b>Cubic</b>     | 0.32 | 0.156 |        |      | Undetermined |   |
|              |             | <b>Linear</b>    | 0.12 | 0.231 |        |      |              |   |
|              |             | <b>Quadratic</b> | 0.31 | 0.195 |        |      |              |   |
|              | <b>BOS</b>  | <b>Cubic</b>     | 0.36 | 0.171 |        |      | Undetermined |   |
|              |             | <b>Linear</b>    | 0.49 | 0.000 | 175.29 | 0.00 |              | ✓ |
|              |             | <b>Quadratic</b> | 0.49 | 0.002 | 178.49 | 3.20 |              |   |
|              |             | <b>Cubic</b>     | 0.59 | 0.001 | 178.57 | 3.28 |              |   |
|              | <b>BOV</b>  | <b>Linear</b>    | 0.21 | 0.439 |        |      | Undetermined |   |
|              |             | <b>Quadratic</b> | 0.54 | 0.145 |        |      |              |   |
|              | <b>CAL</b>  | <b>Cubic</b>     | 0.71 | 0.246 |        |      | Undetermined |   |
|              |             | <b>Linear</b>    | 0.22 | 0.049 | 231.83 | 3.33 |              |   |
|              |             | <b>Quadratic</b> | 0.41 | 0.008 | 228.50 | 0.00 |              | ✓ |
|              | <b>CH</b>   | <b>Cubic</b>     | 0.44 | 0.000 | 230.41 | 1.91 | Undetermined |   |
|              |             | <b>Linear</b>    | 0.21 | 0.073 |        |      |              |   |
|              |             | <b>Quadratic</b> | 0.32 | 0.038 |        |      |              | ✓ |
|              | <b>CI</b>   | <b>Cubic</b>     | 0.35 | 0.061 |        |      | Undetermined |   |
|              |             | <b>Linear</b>    | 0.05 | 0.417 |        |      |              |   |
|              |             | <b>Quadratic</b> | 0.20 | 0.022 | 304.99 | 0.00 |              | ✓ |
|              | <b>CO</b>   | <b>Cubic</b>     | 0.21 | 0.006 | 307.57 | 2.58 | Undetermined |   |
|              |             | <b>Linear</b>    | 0.00 | 0.946 |        |      |              |   |
|              |             | <b>Quadratic</b> | 0.00 | 0.994 |        |      |              |   |
|              | <b>HA</b>   | <b>Cubic</b>     | 0.13 | 0.206 |        |      | Undetermined |   |
|              |             | <b>Linear</b>    | 0.16 | 0.201 |        |      |              |   |
|              |             | <b>Quadratic</b> | 0.79 | 0.001 | 94.92  | 0.00 |              | ✓ |
|              | <b>ICE</b>  | <b>Cubic</b>     | 0.79 | 0.028 | 101.20 | 6.29 | Undetermined |   |
|              |             | <b>Linear</b>    | 0.18 | 0.016 | 224.90 | 0.00 |              | ✓ |
|              |             | <b>Quadratic</b> | 0.20 | 0.061 |        |      |              |   |
|              | <b>JOR</b>  | <b>Cubic</b>     | 0.20 | 0.150 | 230.64 | 5.74 | Undetermined |   |
|              |             | <b>Linear</b>    | 0.16 | 0.010 | 195.70 | 0.00 |              | ✓ |
|              |             | <b>Quadratic</b> | 0.16 | 0.018 | 198.96 | 3.26 |              |   |
|              |             | <b>Cubic</b>     | 0.31 | 0.039 | 199.05 | 3.35 |              |   |

|          |           |           |       |        |        |       |              |
|----------|-----------|-----------|-------|--------|--------|-------|--------------|
|          | MEX       | Linear    | 0.01  | 0.518  |        |       |              |
|          |           | Quadratic | 0.16  | 0.073  |        |       |              |
|          |           | Cubic     | 0.25  | 0.052  | 405.05 | 0.00  | ✓            |
|          | MI        | Linear    | 0.31  | <0.001 | 483.30 | 9.10  |              |
|          |           | Quadratic | 0.31  | <0.001 | 485.23 | 11.03 |              |
|          |           | Cubic     | 0.48  | <0.001 | 474.20 | 0.00  | ✓            |
|          | QL        | Linear    | 0.00  | 0.856  |        |       |              |
|          |           | Quadratic | 0.00  | 0.756  |        |       | Undetermined |
|          |           | Cubic     | 0.00  | 0.916  |        |       |              |
|          | TA        | Linear    | 0.14  | 0.126  |        |       |              |
|          |           | Quadratic | 0.35  | 0.042  |        |       | ✓            |
|          |           | Cubic     | 0.39  | 0.134  |        |       |              |
|          | WA        | Linear    | 0.01  | 0.779  |        |       |              |
|          |           | Quadratic | 0.08  | 0.383  |        |       | Undetermined |
|          |           | Cubic     | 0.08  | 0.377  |        |       |              |
| Protists | ALPS      | Linear    | 0.13  | 0.004  | 250.19 | 4.11  |              |
|          |           | Quadratic | 0.36  | 0.002  | 246.07 | 0.00  | ✓            |
|          |           | Cubic     | 0.40  | 0.006  | 247.95 | 1.87  |              |
|          | AZ        | Linear    | 0.29  | 0.030  | 187.12 | 5.02  |              |
|          |           | Quadratic | 0.57  | 0.004  | 182.10 | 0.00  | ✓            |
|          |           | Cubic     | 0.57  | 0.020  | 186.22 | 4.12  |              |
|          | BOS       | Linear    | 0.35  | 0.002  | 197.81 | 0.00  | ✓            |
|          |           | Quadratic | 0.36  | 0.009  | 200.89 | 3.09  |              |
|          |           | Cubic     | 0.45  | 0.008  | 202.28 | 4.47  |              |
|          | BOV       | Linear    | 0.41  | 0.060  |        |       |              |
|          |           | Quadratic | 0.64  | 0.075  |        |       | Undetermined |
|          |           | Cubic     | 0.65  | 0.312  |        |       |              |
|          | CAL       | Linear    | 0.14  | 0.034  | 273.49 | 3.95  |              |
|          |           | Quadratic | 0.35  | 0.000  | 269.55 | 0.00  | ✓            |
|          |           | Cubic     | 0.35  | 0.001  | 272.71 | 3.16  |              |
| CH       | Linear    | 0.21      | 0.018 |        |        | ✓     |              |
|          | Quadratic | 0.25      | 0.062 |        |        |       |              |
|          | Cubic     | 0.26      | 0.132 |        |        |       |              |
| CI       | Linear    | 0.30      | 0.002 | 311.32 | 6.56   |       |              |

|                      |             |                  |      |        |        |       |              |
|----------------------|-------------|------------------|------|--------|--------|-------|--------------|
|                      |             | <b>Quadratic</b> | 0.50 | 0.000  | 304.77 | 0.00  | ✓            |
|                      |             | <b>Cubic</b>     | 0.51 | 0.000  | 307.33 | 2.57  |              |
|                      | <b>CO</b>   | <b>Linear</b>    | 0.08 | 0.152  |        |       |              |
|                      |             | <b>Quadratic</b> | 0.08 | 0.355  |        |       |              |
|                      |             | <b>Cubic</b>     | 0.29 | 0.054  |        |       | ✓            |
|                      | <b>ICE</b>  | <b>Linear</b>    | 0.09 | 0.039  |        |       | ✓            |
|                      |             | <b>Quadratic</b> | 0.10 | 0.118  |        |       |              |
|                      |             | <b>Cubic</b>     | 0.10 | 0.266  |        |       |              |
|                      | <b>JOR</b>  | <b>Linear</b>    | 0.11 | 0.099  |        |       |              |
|                      |             | <b>Quadratic</b> | 0.11 | 0.082  |        |       | Undetermined |
|                      |             | <b>Cubic</b>     | 0.16 | 0.158  |        |       |              |
|                      | <b>MEX</b>  | <b>Linear</b>    | 0.21 | 0.039  | 307.25 | 16.26 |              |
|                      |             | <b>Quadratic</b> | 0.57 | <0.001 | 290.99 | 0.00  | ✓            |
|                      |             | <b>Cubic</b>     | 0.58 | <0.001 | 293.03 | 2.05  |              |
|                      | <b>MI</b>   | <b>Linear</b>    | 0.01 | 0.505  |        |       |              |
|                      |             | <b>Quadratic</b> | 0.02 | 0.809  |        |       |              |
|                      |             | <b>Cubic</b>     | 0.07 | 0.810  |        |       |              |
|                      | <b>QL</b>   | <b>Linear</b>    | 0.19 | 0.032  | 269.60 | 3.93  |              |
|                      |             | <b>Quadratic</b> | 0.37 | 0.006  | 266.03 | 0.37  | ✓            |
|                      |             | <b>Cubic</b>     | 0.44 | <0.001 | 265.67 | 0.00  |              |
|                      | <b>TA</b>   | <b>Linear</b>    | 0.05 | 0.350  |        |       |              |
|                      |             | <b>Quadratic</b> | 0.17 | 0.199  |        |       | Undetermined |
|                      |             | <b>Cubic</b>     | 0.32 | 0.079  |        |       |              |
|                      | <b>WA</b>   | <b>Linear</b>    | 0.22 | 0.135  |        |       |              |
|                      |             | <b>Quadratic</b> | 0.45 | <0.001 | 286.43 | 0.00  | ✓            |
|                      |             | <b>Cubic</b>     | 0.47 | <0.001 | 288.52 | 2.09  |              |
| <b>Invertebrates</b> | <b>ALPS</b> | <b>Linear</b>    | 0.50 | <0.001 | 158.39 | 3.04  |              |
|                      |             | <b>Quadratic</b> | 0.62 | <0.001 | 155.35 | 0.00  | ✓            |
|                      |             | <b>Cubic</b>     | 0.62 | <0.001 | 158.42 | 3.07  |              |
|                      | <b>AZ</b>   | <b>Linear</b>    | 0.29 | 0.018  | 122.47 | 3.32  |              |
|                      |             | <b>Quadratic</b> | 0.54 | 0.009  | 119.15 | 0.00  | ✓            |
|                      |             | <b>Cubic</b>     | 0.57 | 0.006  | 122.51 | 3.36  |              |
|                      | <b>BOS</b>  | <b>Linear</b>    | 0.45 | 0.018  | 75.09  | 0.00  | ✓            |
|                      |             | <b>Quadratic</b> | 0.47 | 0.060  |        |       |              |

|  |            |                  |      |       |        |       |              |
|--|------------|------------------|------|-------|--------|-------|--------------|
|  |            | <b>Cubic</b>     | 0.68 | 0.057 | 79.41  | 4.32  |              |
|  | <b>BOV</b> | <b>Linear</b>    | 0.04 | 0.312 |        |       |              |
|  |            | <b>Quadratic</b> | 0.71 | 0.001 | 61.24  | 0.00  | ✓            |
|  |            | <b>Cubic</b>     | 0.99 | 0.002 | 77.32  | 16.08 |              |
|  | <b>CAL</b> | <b>Linear</b>    | 0.00 | 0.476 |        |       |              |
|  |            | <b>Quadratic</b> | 0.53 | 0.000 | 171.65 | 0.00  | ✓            |
|  |            | <b>Cubic</b>     | 0.54 | 0.002 | 174.54 | 2.88  |              |
|  | <b>CH</b>  | <b>Linear</b>    | 0.36 | 0.001 | 209.28 | 0.00  | ✓            |
|  |            | <b>Quadratic</b> | 0.36 | 0.004 | 212.03 | 2.75  |              |
|  |            | <b>Cubic</b>     | 0.40 | 0.015 | 213.55 | 4.27  |              |
|  | <b>CI</b>  | <b>Linear</b>    | 0.00 | 1.000 |        |       |              |
|  |            | <b>Quadratic</b> | 0.04 | 0.577 |        |       | Undetermined |
|  |            | <b>Cubic</b>     | 0.04 | 0.703 |        |       |              |
|  | <b>CO</b>  | <b>Linear</b>    | 0.00 | 0.900 |        |       |              |
|  |            | <b>Quadratic</b> | 0.12 | 0.219 |        |       |              |
|  |            | <b>Cubic</b>     | 0.31 | 0.036 |        |       | ✓            |
|  | <b>HA</b>  | <b>Linear</b>    | 0.26 | 0.156 |        |       |              |
|  |            | <b>Quadratic</b> | 0.30 | 0.289 |        |       | Undetermined |
|  |            | <b>Cubic</b>     | 0.38 | 0.381 |        |       |              |
|  | <b>ICE</b> | <b>Linear</b>    | 0.12 | 0.063 |        |       |              |
|  |            | <b>Quadratic</b> | 0.12 | 0.188 |        |       | Undetermined |
|  |            | <b>Cubic</b>     | 0.14 | 0.175 |        |       |              |
|  | <b>JOR</b> | <b>Linear</b>    | 0.14 | 0.097 |        |       |              |
|  |            | <b>Quadratic</b> | 0.19 | 0.169 |        |       | Undetermined |
|  |            | <b>Cubic</b>     | 0.26 | 0.406 |        |       |              |
|  | <b>MEX</b> | <b>Linear</b>    | 0.02 | 0.452 |        |       |              |
|  |            | <b>Quadratic</b> | 0.02 | 0.736 |        |       | Undetermined |
|  |            | <b>Cubic</b>     | 0.08 | 0.369 |        |       |              |
|  | <b>MI</b>  | <b>Linear</b>    | 0.10 | 0.036 |        |       | ✓            |
|  |            | <b>Quadratic</b> | 0.12 | 0.094 |        |       |              |
|  |            | <b>Cubic</b>     | 0.12 | 0.202 |        |       |              |
|  | <b>QL</b>  | <b>Linear</b>    | 0.01 | 0.378 |        |       |              |
|  |            | <b>Quadratic</b> | 0.03 | 0.635 |        |       | Undetermined |
|  |            | <b>Cubic</b>     | 0.03 | 0.832 |        |       |              |



|               |             |                  |              |              |        |      |              |
|---------------|-------------|------------------|--------------|--------------|--------|------|--------------|
|               | <b>TA</b>   | <b>Linear</b>    | 0.00         | 0.710        |        |      |              |
|               |             | <b>Quadratic</b> | 0.38         | 0.004        | 128.66 | 0.00 | ✓            |
|               |             | <b>Cubic</b>     | 0.47         | 0.002        | 129.54 | 0.88 |              |
|               | <b>WA</b>   | <b>Linear</b>    | 0.00         | 0.835        |        |      |              |
|               |             | <b>Quadratic</b> | 0.01         | 0.658        |        |      | Undetermined |
|               |             | <b>Cubic</b>     | 0.05         | 0.561        |        |      |              |
| <b>Plants</b> | <b>ALPS</b> | <b>Linear</b>    | 0.06         | 0.692        |        |      |              |
|               |             | <b>Quadratic</b> | 0.96         | 0.009        |        |      | ✓            |
|               |             | <b>Cubic</b>     | 0.99         | 0.120        |        |      |              |
|               | <b>AZ</b>   | <b>Linear</b>    | 0.18         | 0.037        |        |      | ✓            |
|               |             | <b>Quadratic</b> | 0.50         | 0.706        |        |      |              |
|               |             | <b>Cubic</b>     | Undetermined | Undetermined |        |      |              |
|               | <b>BOS</b>  | <b>Linear</b>    | 0.89         | 0.056        |        |      | ✓            |
|               |             | <b>Quadratic</b> | 0.98         | 0.135        |        |      |              |
|               |             | <b>Cubic</b>     | NC           | NC           |        |      |              |
|               | <b>BOV</b>  | <b>Linear</b>    | 0.97         | 0.017        |        |      | ✓            |
|               |             | <b>Quadratic</b> | 0.99         | 0.076        |        |      |              |
|               |             | <b>Cubic</b>     | NC           | NC           |        |      |              |
|               | <b>CAL</b>  | <b>Linear</b>    | 0.75         | 0.122        |        |      |              |
|               |             | <b>Quadratic</b> | 0.81         | 0.001        |        |      | ✓            |
|               |             | <b>Cubic</b>     | 0.89         | 0.409        |        |      |              |
|               | <b>CH</b>   | <b>Linear</b>    | 0.77         | 0.022        |        |      | ✓            |
|               |             | <b>Quadratic</b> | 0.84         | 0.066        |        |      |              |
|               |             | <b>Cubic</b>     | 0.84         | 0.229        |        |      |              |
|               | <b>CI</b>   | <b>Linear</b>    | 0.05         | 0.709        |        |      |              |
|               |             | <b>Quadratic</b> | 0.31         | 0.704        |        |      | Undetermined |
|               |             | <b>Cubic</b>     | 0.88         | 0.173        |        |      |              |
|               | <b>CO</b>   | <b>Linear</b>    | 0.02         | 0.864        |        |      |              |
|               |             | <b>Quadratic</b> | 0.02         | 0.967        |        |      | Undetermined |
|               |             | <b>Cubic</b>     | 0.03         | 0.937        |        |      |              |
|               | <b>HA</b>   | <b>Linear</b>    | 0.01         | 0.914        |        |      |              |
|               |             | <b>Quadratic</b> | 0.93         | 0.258        |        |      | Undetermined |
|               |             | <b>Cubic</b>     | Undetermined | Undetermined |        |      |              |
|               | <b>ICE</b>  | <b>Linear</b>    | 0.63         | <0.001       |        |      | ✓            |

|  |            |                  |              |              |  |  |              |
|--|------------|------------------|--------------|--------------|--|--|--------------|
|  |            | <b>Quadratic</b> | 0.68         | 0.003        |  |  |              |
|  |            | <b>Cubic</b>     | 0.71         | 0.647        |  |  |              |
|  | <b>JOR</b> | <b>Linear</b>    | 0.03         | 0.833        |  |  |              |
|  |            | <b>Quadratic</b> | 0.97         | 0.167        |  |  | ✓            |
|  |            | <b>Cubic</b>     | Undetermined | Undetermined |  |  |              |
|  | <b>MEX</b> | <b>Linear</b>    | 0.00         | 0.923        |  |  |              |
|  |            | <b>Quadratic</b> | 0.02         | 0.781        |  |  | Undetermined |
|  |            | <b>Cubic</b>     | 0.02         | 0.768        |  |  |              |
|  | <b>MI</b>  | <b>Linear</b>    | 0.07         | 0.175        |  |  |              |
|  |            | <b>Quadratic</b> | 0.21         | 0.497        |  |  | Undetermined |
|  |            | <b>Cubic</b>     | 0.35         | 0.209        |  |  |              |
|  | <b>QL</b>  | <b>Linear</b>    | 0.09         | 0.610        |  |  |              |
|  |            | <b>Quadratic</b> | 0.13         | 0.889        |  |  | Undetermined |
|  |            | <b>Cubic</b>     | 0.16         | 0.351        |  |  |              |
|  | <b>TA</b>  | <b>Linear</b>    | 0.00         | 1.000        |  |  |              |
|  |            | <b>Quadratic</b> | 0.00         | 1.000        |  |  | Undetermined |
|  |            | <b>Cubic</b>     | 0.00         | 1.000        |  |  |              |
|  | <b>WA</b>  | <b>Linear</b>    | 0.88         | 0.006        |  |  | ✓            |
|  |            | <b>Quadratic</b> | 0.88         | 0.040        |  |  |              |
|  |            | <b>Cubic</b>     | 0.89         | 0.301        |  |  |              |

**Table S8.** Correlations (Pearson) between the community composition of soil bacteria, fungi, invertebrates and protists for all the studied soil chronosequences. See Appendix S1, Table S15 for the number of samples used within each chronosequence stage. Red shading indicate significant ( $P \leq 0.05$ ) positive correlations.

| Site | Group    | Parameter | Invertebrates | Protists | Fungi |
|------|----------|-----------|---------------|----------|-------|
| ALPS | Protists | r         | .590          |          |       |
|      |          | P value   | <.001         |          |       |
|      | Fungi    | r         | .646          | .748     |       |
|      |          | P value   | <.001         | <.001    |       |
|      | Bacteria | r         | .636          | .802     | .850  |
|      |          | P value   | <.001         | <.001    | <.001 |
| AZ   | Protists | r         | .518          |          |       |
|      |          | P value   | <.001         |          |       |
|      | Fungi    | r         | .318          | .530     |       |
|      |          | P value   | .004          | <.001    |       |
|      | Bacteria | r         | .333          | .595     | .403  |
|      |          | P value   | .002          | <.001    | .001  |
| BOS  | Protists | r         | .274          |          |       |
|      |          | P value   | .035          |          |       |
|      | Fungi    | r         | .200          | .486     |       |
|      |          | P value   | .070          | <.001    |       |
|      | Bacteria | r         | .268          | .652     | .586  |
|      |          | P value   | .030          | <.001    | <.001 |
| BOV  | Protists | r         | .513          |          |       |
|      |          | P value   | .056          |          |       |
|      | Fungi    | r         | .545          | .867     |       |
|      |          | P value   | .047          | .002     |       |
|      | Bacteria | r         | .687          | .818     | .909  |
|      |          | P value   | .016          | .019     | .004  |
| CAL  | Protists | r         | .398          |          |       |
|      |          | P value   | <.001         |          |       |
|      | Fungi    | r         | .659          | .467     |       |
|      |          | P value   | <.001         | <.001    |       |
|      | Bacteria | r         | .577          | .434     | .827  |
|      |          | P value   | <.001         | <.001    | <.001 |
| CH   | Protists | r         | .721          |          |       |
|      |          | P value   | <.001         |          |       |
|      | Fungi    | r         | .625          | .764     |       |
|      |          | P value   | <.001         | <.001    |       |
|      | Bacteria | r         | .618          | .753     | .657  |
|      |          | P value   | <.001         | <.001    | <.001 |
| CI   | Protists | r         | .615          |          |       |

|            |                 |                |       |       |       |
|------------|-----------------|----------------|-------|-------|-------|
|            |                 | <b>P value</b> | <.001 |       |       |
|            | <b>Fungi</b>    | <b>r</b>       | .585  | .867  |       |
|            |                 | <b>P value</b> | <.001 | <.001 |       |
|            | <b>Bacteria</b> | <b>r</b>       | .654  | .902  | .869  |
|            |                 | <b>P value</b> | <.001 | <.001 | <.001 |
| <b>CO</b>  | <b>Protists</b> | <b>r</b>       | .403  |       |       |
|            |                 | <b>P value</b> | <.001 |       |       |
|            | <b>Fungi</b>    | <b>r</b>       | .461  | .742  |       |
|            |                 | <b>P value</b> | <.001 | <.001 |       |
|            | <b>Bacteria</b> | <b>r</b>       | .389  | .672  | .683  |
|            |                 | <b>P value</b> | <.001 | <.001 | <.001 |
| <b>HA</b>  | <b>Fungi</b>    | <b>r</b>       | .284  |       |       |
|            |                 | <b>P value</b> | .024  |       |       |
|            | <b>Bacteria</b> | <b>r</b>       | .186  |       | .656  |
|            |                 | <b>P value</b> | .111  |       | <.001 |
| <b>ICE</b> | <b>Protists</b> | <b>r</b>       | .252  |       |       |
|            |                 | <b>P value</b> | .003  |       |       |
|            | <b>Fungi</b>    | <b>r</b>       | .241  | .390  |       |
|            |                 | <b>P value</b> | .001  | <.001 |       |
|            | <b>Bacteria</b> | <b>r</b>       | .122  | .239  | .426  |
|            |                 | <b>P value</b> | .141  | .062  | <.001 |
| <b>JOR</b> | <b>Protists</b> | <b>r</b>       | .063  |       |       |
|            |                 | <b>P value</b> | .223  |       |       |
|            | <b>Fungi</b>    | <b>r</b>       | .101  | .644  |       |
|            |                 | <b>P value</b> | .129  | <.001 |       |
|            | <b>Bacteria</b> | <b>r</b>       | .055  | .523  | .496  |
|            |                 | <b>P value</b> | .259  | <.001 | <.001 |
| <b>MEX</b> | <b>Protists</b> | <b>r</b>       | .380  |       |       |
|            |                 | <b>P value</b> | <.001 |       |       |
|            | <b>Fungi</b>    | <b>r</b>       | .269  | .667  |       |
|            |                 | <b>P value</b> | <.001 | <.001 |       |
|            | <b>Bacteria</b> | <b>r</b>       | .296  | .717  | .652  |
|            |                 | <b>P value</b> | <.001 | <.001 | <.001 |
| <b>MI</b>  | <b>Protists</b> | <b>r</b>       | .594  |       |       |
|            |                 | <b>P value</b> | <.001 |       |       |
|            | <b>Fungi</b>    | <b>r</b>       | .647  | .783  |       |
|            |                 | <b>P value</b> | <.001 | <.001 |       |
|            | <b>Bacteria</b> | <b>r</b>       | .682  | .871  | .871  |
|            |                 | <b>P value</b> | <.001 | <.001 | <.001 |
| <b>QL</b>  | <b>Protists</b> | <b>r</b>       | .296  |       |       |
|            |                 | <b>P value</b> | .004  |       |       |
|            | <b>Fungi</b>    | <b>r</b>       | .191  | .455  |       |
|            |                 | <b>P value</b> | .077  | <.001 |       |

|          |          |         |       |       |       |
|----------|----------|---------|-------|-------|-------|
| TA       | Bacteria | r       | .485  | .505  | .571  |
|          |          | P value | <.001 | <.001 | <.001 |
|          | Protists | r       | .349  |       |       |
|          |          | P value | <.001 |       |       |
|          | Fungi    | r       | .349  | 1.00  |       |
|          |          | P value | <.001 | <.001 |       |
| WA       | Bacteria | r       | .285  | .711  | .711  |
|          |          | P value | .005  | <.001 | <.001 |
|          | Protists | r       | .400  |       |       |
|          |          | P value | <.001 |       |       |
|          | Fungi    | r       | .376  | .841  |       |
|          |          | P value | <.001 | <.001 |       |
| Bacteria | r        | .438    | .831  | .780  |       |
|          | P value  | <.001   | <.001 | <.001 |       |

**Table S9.** Correlations (Spearman) between the plant diversity (perennial plant richness; number of species) with environmental predictors within each of the 16 soil chronosequences studied. Red and blue shading indicate significant ( $P \leq 0.05$ ) positive and negative correlations, respectively.

| Chronosequence | Parameter | Plant cover | Soil C | Soil aP | Clay+silt | pH     | Salinity | Soil C:N | Soil N:P | Shared pattern with belowground diversity |
|----------------|-----------|-------------|--------|---------|-----------|--------|----------|----------|----------|-------------------------------------------|
|                |           |             |        |         |           |        |          |          |          |                                           |
| ALPS           | $\rho$    | 0.900       | 0.361  | 0.357   | -0.3      | -0.333 | -0.369   | -0.671   | 0.384    | ✓                                         |
|                | P-value   | <0.001      | 0.076  | 0.080   | 0.145     | 0.103  | 0.07     | <0.001   | 0.058    |                                           |
|                | n         | 25          | 25     | 25      | 25        | 25     | 25       | 25       | 25       |                                           |
| AZ             | $\rho$    | 0.00        | 0.24   | -0.256  | -0.4      | 0.012  | -0.039   | 0.628    | 0.209    |                                           |
|                | P-value   | 1.00        | 0.307  | 0.276   | 0.081     | 0.961  | 0.871    | 0.003    | 0.376    |                                           |
|                | n         | 20          | 20     | 20      | 20        | 20     | 20       | 20       | 20       |                                           |
| BOS            | $\rho$    | -0.105      | 0.515  | 0.458   | 0.211     | -0.722 | -0.405   | 0.119    | 0.515    |                                           |
|                | P-value   | 0.658       | 0.02   | 0.042   | 0.372     | <0.001 | 0.077    | 0.619    | 0.02     |                                           |
|                | n         | 20          | 20     | 20      | 20        | 20     | 20       | 20       | 20       |                                           |
| BOV            | $\rho$    | 0.800       | 0.14   | 0.481   | 0.6       | 0.186  | -0.473   | 0.768    | -0.279   |                                           |
|                | P-value   | <0.001      | 0.557  | 0.032   | 0.005     | 0.431  | 0.035    | <0.001   | 0.233    |                                           |
|                | n         | 20          | 20     | 20      | 20        | 20     | 20       | 20       | 20       |                                           |
| CAL            | $\rho$    | 0.612       | -0.266 | 0.566   | -0.289    | 0.748  | 0.023    | 0.034    | -0.453   | ✓                                         |
|                | P-value   | 0.001       | 0.198  | 0.003   | 0.162     | <0.001 | 0.914    | 0.872    | 0.023    |                                           |
|                | n         | 25          | 25     | 25      | 25        | 25     | 25       | 25       | 25       |                                           |
| CH             | $\rho$    | 0.943       | 0.626  | 0.502   | -0.143    | -0.452 | 0.696    | -0.098   | 0.639    | ✓                                         |
|                | P-value   | <0.001      | <0.001 | 0.005   | 0.451     | 0.012  | <0.001   | 0.606    | <0.001   |                                           |
|                | n         | 30          | 30     | 30      | 30        | 30     | 30       | 30       | 30       |                                           |
| CI             | $\rho$    | 0.334       | 0.114  | 0.116   | 0.03      | -0.274 | 0.093    | -0.78    | 0.212    |                                           |
|                | P-value   | 0.071       | 0.549  | 0.541   | 0.873     | 0.142  | 0.623    | <0.001   | 0.261    |                                           |
|                | n         | 30          | 30     | 30      | 30        | 30     | 30       | 30       | 30       |                                           |
| CO             | $\rho$    | 0.086       | 0.185  | 0.035   | 0.543     | 0.112  | -0.08    | 0.369    | 0.152    |                                           |
|                | P-value   | 0.652       | 0.328  | 0.855   | 0.002     | 0.557  | 0.674    | 0.045    | 0.422    |                                           |
|                | n         | 30          | 30     | 30      | 30        | 30     | 30       | 30       | 30       |                                           |
| HA             | $\rho$    | -0.316      | 0.399  | 0.544   | 0.949     | -0.29  | 0.278    | 0.00     | -0.139   |                                           |
|                | P-value   | 0.174       | 0.082  | 0.013   | <0.001    | 0.215  | 0.235    | 1.00     | 0.559    |                                           |
|                | n         | 20          | 20     | 20      | 20        | 20     | 20       | 20       | 20       |                                           |
| ICE            | $\rho$    | 0.975       | -0.495 | 0.225   | 0.154     | 0.205  | 0.423    | -0.543   | 0.32     | ✓                                         |
|                | P-value   | <0.001      | 0.012  | 0.279   | 0.463     | 0.325  | 0.035    | 0.005    | 0.119    |                                           |
|                | n         | 25          | 25     | 25      | 25        | 25     | 25       | 25       | 25       |                                           |
| JOR            | $\rho$    | 0.4         | 0.012  | -0.209  | -0.4      | 0.404  | 0.527    | -0.411   | 0.45     |                                           |
|                | P-value   | 0.081       | 0.961  | 0.376   | 0.081     | 0.077  | 0.017    | 0.072    | 0.047    |                                           |
|                | n         | 20          | 20     | 20      | 20        | 20     | 20       | 20       | 20       |                                           |
| MEX            | $\rho$    | -0.229      | -0.123 | -0.516  | -0.639    | -0.277 | -0.071   | 0.068    | 0.405    |                                           |
|                | P-value   | 0.155       | 0.45   | 0.001   | <0.001    | 0.083  | 0.664    | 0.677    | 0.01     |                                           |



**Table S10.** Summary for the best models predicting the relationship between stage and selected environmental factors for the 16 soil chronosequences studied. Models are ranked by significance, AIC and parsimony. AICc measures the relative goodness of fit of a given model; the lower its value, the more likely the model is correct.  $\Delta$ AICc are difference between the AICc of each model and that of the best model.

| Response variable | Soil      | Model     | R <sup>2</sup> | P value | AICc   | DeltaAICc | Selected Model |
|-------------------|-----------|-----------|----------------|---------|--------|-----------|----------------|
| pH                | CAL       | Linear    | 0.09           | 0.148   |        |           |                |
|                   |           | Quadratic | 0.39           | 0.006   | 57.44  | 0.00      | ✓              |
|                   |           | Cubic     | 0.39           | 0.020   | 60.59  | 3.15      |                |
|                   | HA        | Linear    | 0.28           | 0.017   | 28.60  | 8.93      |                |
|                   |           | Quadratic | 0.46           | 0.012   | 26.18  | 6.50      |                |
|                   |           | Cubic     | 0.67           | 0.001   | 19.67  | 0.00      | ✓              |
|                   | MEX       | Linear    | 0.01           | 0.834   |        |           |                |
|                   |           | Quadratic | 0.30           | <0.001  | 22.40  | 1.10      | ✓              |
|                   |           | Cubic     | 0.36           | 0.000   | 21.30  | 0.00      |                |
|                   | MI        | Linear    | 0.67           | <0.001  | 120.75 | 28.31     |                |
|                   |           | Quadratic | 0.68           | <0.001  | 120.90 | 28.46     |                |
|                   |           | Cubic     | 0.83           | <0.001  | 92.44  | 0.00      | ✓              |
|                   | QL        | Linear    | 0.39           | <0.001  | 61.74  | 39.71     |                |
|                   |           | Quadratic | 0.74           | <0.001  | 38.87  | 16.85     |                |
|                   |           | Cubic     | 0.86           | <0.001  | 22.02  | 0.00      | ✓              |
| WA                | Linear    | 0.93      | <0.001         | 24.90   | 4.41   |           |                |
|                   | Quadratic | 0.93      | <0.001         | 26.23   | 5.74   |           |                |
|                   | Cubic     | 0.95      | <0.001         | 20.50   | 0.00   | ✓         |                |
| Salinity          | CH        | Linear    | 0.47           | <0.001  | 324.98 | 4.54      |                |
|                   |           | Quadratic | 0.54           | <0.001  | 323.78 | 3.34      |                |
|                   |           | Cubic     | 0.62           | <0.001  | 320.44 | 0.00      | ✓              |
| Soil C:N          | BOV       | Linear    | 0.53           | <0.001  | 115.21 | 0.00      | ✓              |
|                   |           | Quadratic | 0.54           | <0.001  | 118.19 | 2.98      |                |
|                   |           | Cubic     | 0.59           | 0.007   | 119.11 | 3.90      |                |



**Table S11.** Summary for the best models predicting the relationship between selected environmental variables and belowground biodiversity. Models are ranked by significance, AIC and parsimony. AICc measures the relative goodness of fit of a given model; the lower its value, the more likely the model is correct.  $\Delta$ AICc are differences between the AICc of each model and that of the best model.

| Predictor variable | Soil      | Model     | R <sup>2</sup> | P value | AICc    | DeltaAICc | Selected Model |
|--------------------|-----------|-----------|----------------|---------|---------|-----------|----------------|
| pH                 | CAL       | Linear    | 0.798          | <0.001  | -63.213 | 0.000     | ✓              |
|                    |           | Quadratic | 0.824          | <0.001  | -63.002 | 0.211     |                |
|                    |           | Cubic     | 0.834          | <0.001  | -60.764 | 2.449     |                |
|                    | HA        | Linear    | 0.395          | 0.032   | -28.502 | 0.893     | ✓              |
|                    |           | Quadratic | 0.455          | 0.060   |         |           |                |
|                    |           | Cubic     | 0.822          | 0.006   | -29.395 | 0.000     |                |
|                    | MEX       | Linear    | 0.240          | 0.005   | -65.380 | 0.000     | ✓              |
|                    |           | Quadratic | 0.275          | 0.018   | -64.120 | 1.260     |                |
|                    |           | Cubic     | 0.279          | 0.047   | -61.380 | 4.000     |                |
|                    | MI        | Linear    | 0.478          | <0.001  | -54.050 | 0.000     | ✓              |
|                    |           | Quadratic | 0.482          | <0.001  | -51.371 | 2.678     |                |
|                    |           | Cubic     | 0.514          | <0.001  | -49.818 | 4.232     |                |
|                    | QL        | Linear    | 0.539          | <0.001  | -68.278 | 0.000     | ✓              |
|                    |           | Quadratic | 0.552          | <0.001  | -66.143 | 2.135     |                |
|                    |           | Cubic     | 0.577          | 0.001   | -64.373 | 3.905     |                |
| WA                 | Linear    | 0.110     | 0.042          | -43.360 | 2.114   | ✓         |                |
|                    | Quadratic | 0.226     | 0.396          |         |         |           |                |
|                    | Cubic     | 0.412     | 0.004          | -45.474 | 0.000   |           |                |
| Plant cover        | ALPS      | Linear    | 0.455          | 0.015   | -19.678 | 0.000     | ✓              |
|                    |           | Quadratic | 0.517          | 0.011   | -17.946 | 1.732     |                |
|                    |           | Cubic     | 0.560          | 0.002   | -15.085 | 4.594     |                |
|                    | AZ        | Linear    | 0.454          | 0.005   | -25.757 | 0.000     | ✓              |
|                    |           | Quadratic | 0.518          | <0.001  | -23.807 | 1.950     |                |
|                    |           | Cubic     | 0.579          | <0.001  | -21.194 | 4.562     |                |
|                    | BOS       | Linear    | 0.774          | 0.559   |         |           | ✓              |
|                    |           | Quadratic | 0.449          | 0.019   | -17.132 | 0.000     |                |
|                    |           | Cubic     | 0.646          | 0.035   | -16.165 | 0.966     |                |
|                    | CI        | Linear    | 0.423          | 0.000   | -14.072 | 0.000     | ✓              |

|                 |            |                  |        |        |         |       |   |
|-----------------|------------|------------------|--------|--------|---------|-------|---|
|                 |            | <b>Quadratic</b> | 0.436  | 0.002  | -11.624 | 2.448 |   |
|                 |            | <b>Cubic</b>     | 0.439  | <0.001 | -8.445  | 5.628 |   |
|                 | <b>CO</b>  | <b>Linear</b>    | 0.322  | 0.002  | -67.095 | 4.058 |   |
|                 |            | <b>Quadratic</b> | 0.349  | 0.010  | -65.402 | 5.752 |   |
|                 |            | <b>Cubic</b>     | 0.530  | <0.001 | -71.154 | 0.000 | ✓ |
|                 | <b>ICE</b> | <b>Linear</b>    | 0.167  | 0.049  |         |       | ✓ |
|                 |            | <b>Quadratic</b> | 0.232  | 0.096  |         |       |   |
|                 |            | <b>Cubic</b>     | 0.260  | 0.110  |         |       |   |
| <b>Texture</b>  | <b>TA</b>  | <b>Linear</b>    | 0.110  | 0.066  |         |       |   |
|                 |            | <b>Quadratic</b> | 0.128  | 0.165  |         |       |   |
|                 |            | <b>Cubic</b>     | 0.414  | 0.066  |         |       | ✓ |
| <b>Salinity</b> | <b>CH</b>  | <b>Linear</b>    | 0.289  | 0.005  | -39.902 | 0.672 | ✓ |
|                 |            | <b>Quadratic</b> | 0.374  | 0.008  | -40.574 | 0.000 |   |
|                 |            | <b>Cubic</b>     | 0.385  | 0.023  | -38.009 | 2.565 |   |
| <b>Soil C:N</b> | <b>BOV</b> | <b>Linear</b>    | 0.3089 | 0.053  | 6.87    | 0     | ✓ |
|                 |            | <b>Quadratic</b> | 0.7557 | 0.004  | 30.63   | 23.76 |   |
|                 |            | <b>Cubic</b>     | 0.8136 | 0.252  |         |       |   |

**Table S12.** Mantel test correlations (Spearman) between number of chronosequence stage dissimilarity (Euclidean) and environmental factors dissimilarity (Euclidean). Red shading indicate significant ( $P \leq 0.05$ ) positive correlations.

|      | Plant cover | Soil C | Soil P | pH   | Salinity | Clay+silt | CN   | NP   |
|------|-------------|--------|--------|------|----------|-----------|------|------|
| ALPS | .338        | .511   | .468   | .616 |          | .609      | .227 | .681 |
| AZ   | .659        |        | .332   |      | .387     | .964      |      | .262 |
| BOS  | .659        |        | .193   | .340 |          | .659      |      | .261 |
| BOV  | .746        |        | .143   |      |          | .616      | .405 |      |
| CAL  |             |        | .704   | .201 | .393     | .292      |      | .365 |
| CH   | .726        | .305   | .236   | .396 | .404     | .469      |      | .489 |
| CI   | .566        | .358   | .535   |      | .473     | .845      | .151 | .237 |
| CO   | .285        | .151   | .178   | .125 |          | .485      |      |      |
| HA   | .181        |        | .160   | .249 |          | .355      |      | .225 |
| ICE  | .681        |        |        |      | .131     | .259      | .299 | .203 |
| JOR  | .210        |        |        | .457 | .234     | .210      | .254 | .341 |
| MEX  | .443        | .282   |        | .216 | .186     | .377      |      | .255 |
| MI   | .263        | .210   | .124   | .606 | .441     | .652      | .275 | .321 |
| QL   | .507        |        |        | .304 |          | .645      |      | .457 |
| TA   |             | .214   | .152   |      |          | .659      |      | .133 |
| WA   | .418        | .386   | .748   | .892 | .322     | .452      | .557 | .763 |

**Table S13.** Mantel test correlations (Spearman) between environmental factors dissimilarity (Euclidean) and soil belowground community dissimilarity (Bray-Curtis). Red shading indicate significant ( $P \leq 0.05$ ) positive correlations.

|      | Plant cover | C    | aP   | pH   | Salinity | Clay+silt | CN   | NP   |
|------|-------------|------|------|------|----------|-----------|------|------|
| ALPS | .387        | .574 | .439 | .711 |          | .632      |      | .672 |
| AZ   | .483        |      | .360 |      | .235     | .367      |      |      |
| BOS  | .613        |      |      | .328 |          | .661      |      |      |
| BOV  | .732        |      | .639 |      |          |           |      |      |
| CAL  |             |      | .612 | .507 | .649     | .319      |      | .267 |
| CH   | .706        | .205 | .323 | .510 | .338     |           |      | .508 |
| CI   | .298        |      |      |      |          |           | .318 | .194 |
| CO   | .182        |      |      | .459 |          | .371      |      |      |
| HA   | .331        |      | .423 | .646 |          | .559      |      |      |
| ICE  | .299        |      |      |      | .252     | .319      | .320 | .315 |
| JOR  |             |      |      |      | .471     |           |      |      |
| MEX  | .207        | .292 |      | .501 | .365     | .364      |      |      |
| MI   | .155        |      | .260 | .596 | .518     | .561      |      |      |
| QL   | .139        |      |      | .537 |          | .587      |      | .472 |
| TA   |             | .432 | .399 |      |          | .195      |      |      |
| WA   | .595        | .576 | .682 | .684 | .410     | .587      |      | .527 |

**Table S14.** Correlation (Spearman) between the relative abundance of soil bacteria, fungi, protists and invertebrates at the class level. Only positive correlations between abundance of taxa and pH or plant cover are shown. A “-” symbol indicates that this taxon was not found in this chronosequence. <sup>b</sup>*P* < 0.10; <sup>a</sup>*P* = 0.06; \**P* ≤ 0.05; \*\**P* < 0.01. Red shading indicate positive correlations.

| Environmental cluster | Group    | Taxa                  | ICE           | CI                      | BOS                     | AZ                      | ALPS                    |
|-----------------------|----------|-----------------------|---------------|-------------------------|-------------------------|-------------------------|-------------------------|
| Plant cover           | Bacteria | Anaerolineae          | 0.10          | <b>0.41*</b>            | <b>0.53<sup>b</sup></b> | 0.09                    | 0.40                    |
|                       | Bacteria | Betaproteobacteria    | <b>0.62**</b> | 0.10                    | 0.16                    | 0.03                    | 0.20                    |
|                       | Bacteria | Planctomycetia        | 0.04          | 0.35                    | <b>0.51<sup>b</sup></b> | 0.36                    | 0.38                    |
|                       | Fungi    | Blastocladiomycetes   | 0.07          | 0.22                    | 0.27                    | <b>0.62*</b>            | <b>0.47<sup>a</sup></b> |
|                       | Fungi    | Glomeromycetes        | 0.00          | 0.34                    | <b>0.55<sup>a</sup></b> | 0.42                    | <b>0.43<sup>b</sup></b> |
|                       | Protists | Raphidpennate         | -             | 0.33                    | <b>0.70*</b>            | 0.29                    | 0.10                    |
|                       | Protists | Sandonidae            | 0.22          | 0.12                    | 0.39                    | <b>0.46<sup>b</sup></b> | 0.17                    |
|                       | Protists | Sorogenidae           | 0.15          | <b>0.39<sup>a</sup></b> | 0.08                    | 0.20                    | <b>0.59*</b>            |
|                       | Protists | Urostylidae           | 0.18          | 0.02                    | <b>0.55<sup>a</sup></b> | 0.35                    | <b>0.54*</b>            |
| Environmental cluster | Group    | Taxa                  | QL            | MI                      | MEX                     | HA                      | CAL                     |
| pH                    | Bacteria | Acidobacteria.6       | <b>0.40*</b>  | <b>0.85**</b>           | <b>0.39*</b>            | <b>0.55<sup>b</sup></b> | <b>0.95**</b>           |
|                       | Bacteria | Opiritatae            | 0.33          | <b>0.68**</b>           | 0.11                    | 0.32                    | <b>0.67**</b>           |
|                       | Bacteria | Acidimicrobiia        | 0.26          | <b>0.84**</b>           | 0.17                    | <b>0.61*</b>            | <b>0.85**</b>           |
|                       | Bacteria | Anaerolineae          | 0.32          | <b>0.79**</b>           | <b>0.35<sup>a</sup></b> | <b>0.55<sup>b</sup></b> | 0.02                    |
|                       | Bacteria | Cytophagia            | 0.30          | <b>0.68**</b>           | <b>0.65**</b>           | <b>0.65*</b>            | <b>0.82**</b>           |
|                       | Bacteria | Saprospirae           | <b>0.60**</b> | <b>0.75**</b>           | 0.19                    | 0.37                    | 0.16                    |
|                       | Protists | Mb5C lineage          | 0.06          | <b>0.54**</b>           | <b>0.72**</b>           | -                       | 0.19                    |
|                       | Protists | Filamoebidae          | <b>0.38*</b>  | <b>0.48*</b>            | <b>0.54**</b>           | -                       | 0.37                    |
|                       | Protists | Sorogenidae           | <b>0.40*</b>  | 0.06                    | 0.26                    | -                       | 0.05                    |
|                       | Protists | Thaumatomonadidae     | <b>0.52**</b> | <b>0.58**</b>           | <b>0.51**</b>           | -                       | <b>0.77**</b>           |
|                       | Protists | Chrysophyceae Clade C | 0.20          | <b>0.66**</b>           | <b>0.80**</b>           | -                       | <b>0.67**</b>           |

**Table S15.** Number of soil samples that passed the cut-off after rarefaction for single groups of belowground organisms and for belowground biodiversity in each stage and soil chronosequence. These data were used for statistical modelling out of five possible. A “-“ symbol indicates no data.

| Chronosequence | Stage | Bacteria | Fungi | Protists | Invertebrates | Belowground diversity |
|----------------|-------|----------|-------|----------|---------------|-----------------------|
| ALPS           | 1     | 5        | 2     | 5        | 4             | 2                     |
|                | 2     | 5        | 4     | 5        | 5             | 4                     |
|                | 3     | 5        | 4     | 5        | 5             | 4                     |
|                | 4     | 4        | 4     | 5        | 5             | 3                     |
|                | 5     | 3        | 3     | 3        | 3             | 3                     |
| AZ             | 1     | 5        | 4     | 4        | 3             | 3                     |
|                | 2     | 5        | 4     | 4        | 4             | 4                     |
|                | 3     | 4        | 5     | 5        | 5             | 4                     |
|                | 4     | 5        | 4     | 4        | 4             | 4                     |
| BOS            | 1     | 5        | 5     | 5        | 1             | 1                     |
|                | 2     | 5        | 4     | 4        | 4             | 4                     |
|                | 3     | 5        | 4     | 4        | 2             | 2                     |
|                | 4     | 5        | 5     | 5        | 5             | 5                     |
| BOV            | 1     | 2        | 1     | 2        | 1             | 1                     |
|                | 2     | 1        | 1     | 1        | 2             | 1                     |
|                | 3     | 3        | 3     | 2        | 1             | 1                     |
|                | 4     | 3        | 3     | 3        | 3             | 3                     |
| CAL            | 1     | 5        | 5     | 5        | 5             | 5                     |
|                | 2     | 5        | 5     | 5        | 5             | 5                     |
|                | 3     | 5        | 3     | 5        | 4             | 2                     |
|                | 4     | 5        | 5     | 5        | 5             | 5                     |
|                | 5     | 5        | 5     | 5        | 5             | 4                     |
| CH             | 1     | 5        | 5     | 4        | 4             | 4                     |
|                | 2     | 5        | 5     | 4        | 4             | 4                     |
|                | 3     | 5        | 5     | 5        | 5             | 5                     |
|                | 4     | 5        | 5     | 5        | 5             | 5                     |
|                | 5     | 5        | 5     | 5        | 5             | 5                     |
|                | 6     | 4        | 4     | 4        | 4             | 4                     |
| CI             | 1     | 5        | 5     | 5        | 4             | 4                     |
|                | 2     | 5        | 5     | 5        | 4             | 4                     |

---

|     |   |   |   |   |   |   |
|-----|---|---|---|---|---|---|
|     | 3 | 5 | 5 | 5 | 5 | 5 |
|     | 4 | 5 | 5 | 3 | 5 | 3 |
|     | 5 | 4 | 4 | 4 | 4 | 3 |
|     | 6 | 5 | 5 | 5 | 4 | 4 |
| CO  | 1 | 5 | 5 | 5 | 5 | 5 |
|     | 2 | 5 | 5 | 5 | 5 | 5 |
|     | 3 | 4 | 4 | 5 | 5 | 3 |
|     | 4 | 5 | 5 | 5 | 5 | 5 |
|     | 5 | 5 | 5 | 5 | 4 | 4 |
|     | 6 | 5 | 5 | 5 | 5 | 5 |
| HA  | 1 | 5 | 4 | - | 4 | 4 |
|     | 2 | 3 | 4 | - | 4 | 3 |
|     | 3 | 3 | 2 | - | 2 | 2 |
|     | 4 | 2 | 2 | - | 2 | 2 |
| ICE | 1 | 5 | 5 | 5 | 5 | 5 |
|     | 2 | 5 | 3 | 5 | 5 | 3 |
|     | 3 | 5 | 5 | 5 | 5 | 5 |
|     | 4 | 5 | 5 | 5 | 5 | 5 |
|     | 5 | 5 | 5 | 5 | 5 | 5 |
| JOR | 1 | 5 | 5 | 5 | 5 | 5 |
|     | 2 | 5 | 4 | 4 | 4 | 4 |
|     | 3 | 5 | 5 | 5 | 4 | 4 |
|     | 4 | 5 | 5 | 5 | 3 | 3 |
| MEX | 1 | 5 | 5 | 4 | 5 | 4 |
|     | 2 | 5 | 5 | 4 | 5 | 4 |
|     | 3 | 4 | 5 | 5 | 5 | 4 |
|     | 4 | 5 | 5 | 4 | 5 | 4 |
|     | 5 | 5 | 5 | 5 | 5 | 5 |
|     | 6 | 5 | 5 | 3 | 5 | 3 |
|     | 7 | 5 | 5 | 2 | 4 | 2 |
|     | 8 | 5 | 5 | 4 | 5 | 4 |
| MI  | 1 | 5 | 5 | 5 | 2 | 2 |
|     | 2 | 5 | 5 | 5 | 4 | 4 |
|     | 3 | 4 | 4 | 4 | 3 | 2 |
|     | 4 | 5 | 5 | 5 | 2 | 2 |

---

---

|    |    |   |   |   |   |   |
|----|----|---|---|---|---|---|
|    | 5  | 5 | 5 | 4 | 5 | 4 |
|    | 6  | 5 | 5 | 4 | 4 | 4 |
|    | 7  | 5 | 4 | 2 | 3 | 2 |
|    | 8  | 4 | 5 | 1 | 2 | 1 |
|    | 9  | 5 | 5 | 1 | 4 | 1 |
|    | 10 | 5 | 5 | 4 | 4 | 3 |
| QL | 1  | 5 | 4 | 3 | 5 | 3 |
|    | 2  | 5 | 4 | 4 | 4 | 4 |
|    | 3  | 5 | 5 | 5 | 5 | 5 |
|    | 4  | 4 | 4 | 4 | 4 | 4 |
|    | 5  | 5 | 5 | 5 | 4 | 4 |
|    | 6  | 5 | 5 | 5 | 5 | 5 |
| TA | 1  | 5 | 5 | 5 | 4 | 4 |
|    | 2  | 4 | 4 | 5 | 4 | 4 |
|    | 3  | 5 | 5 | 5 | 5 | 5 |
|    | 4  | 5 | 4 | 5 | 5 | 4 |
| WA | 1  | 5 | 4 | 5 | 4 | 4 |
|    | 2  | 3 | 2 | 3 | 3 | 2 |
|    | 3  | 4 | 5 | 5 | 5 | 4 |
|    | 4  | 5 | 5 | 5 | 5 | 5 |
|    | 5  | 5 | 5 | 5 | 5 | 5 |
|    | 6  | 5 | 5 | 5 | 1 | 1 |

---



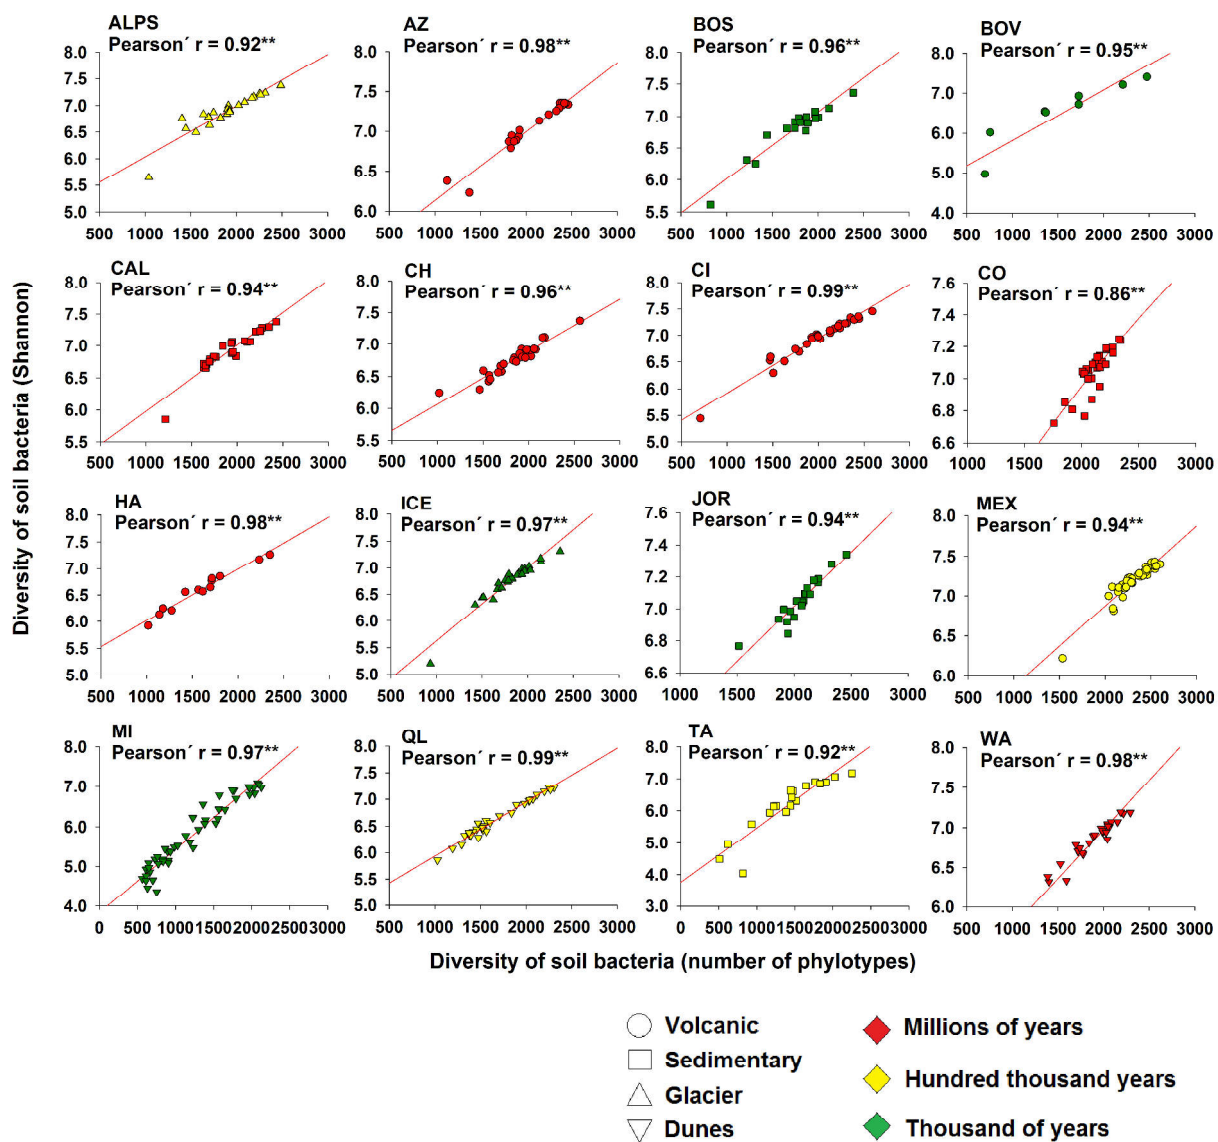

**Figure S1.** Relationships between number of phylotypes and Shannon diversity of soil bacteria in 16 globally distributed soil chronosequences.

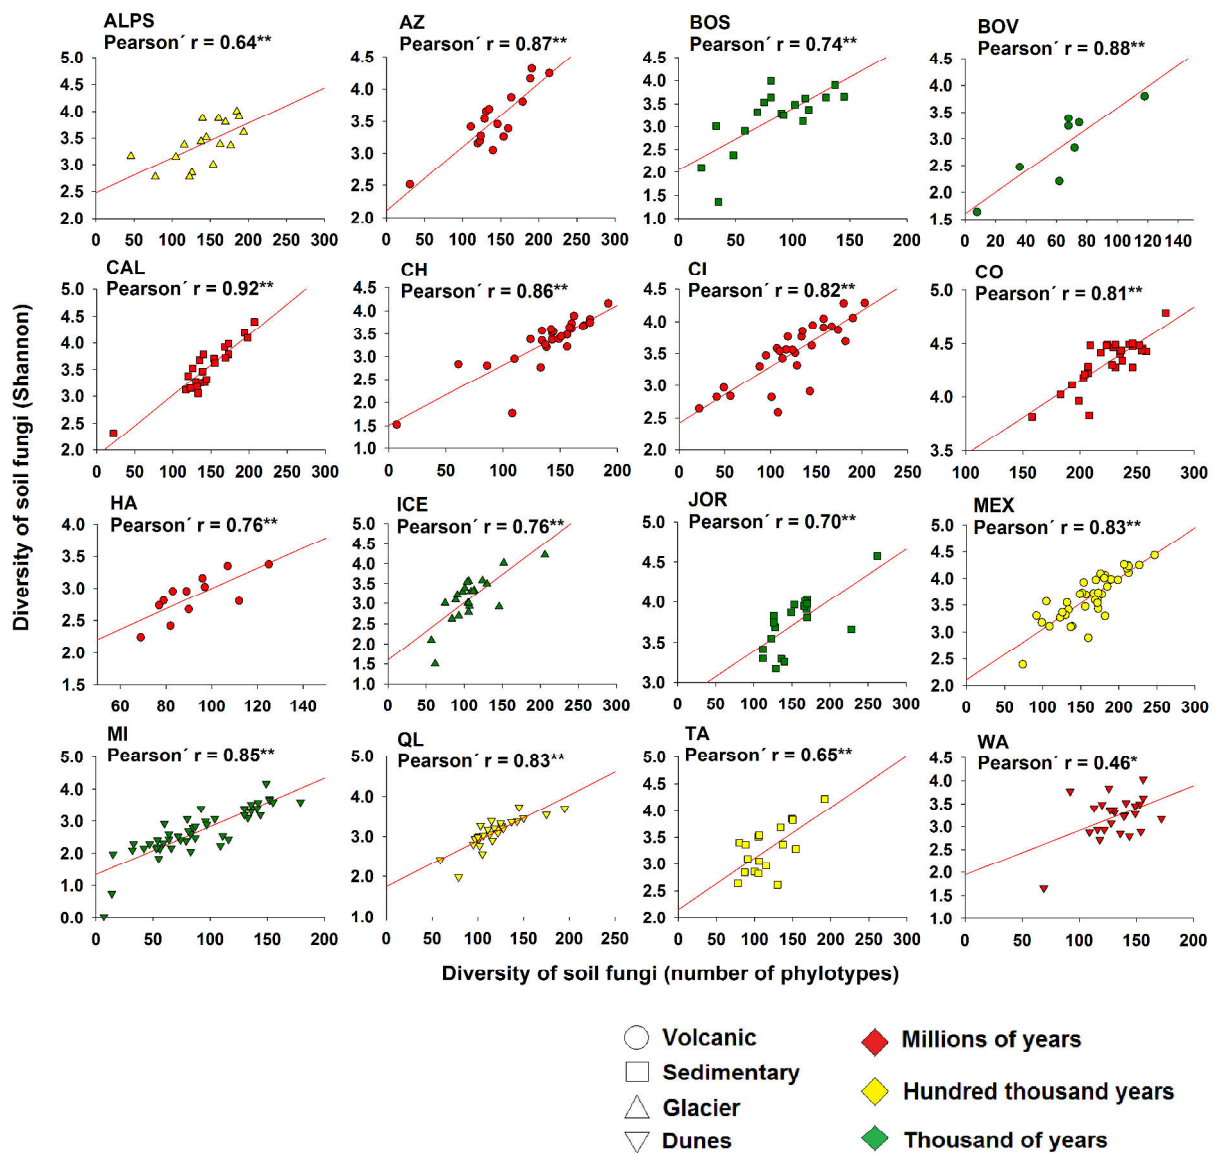

**Figure S2.** Relationships between number of phylotypes and Shannon diversity of soil fungi in 16 globally distributed soil chronosequences.

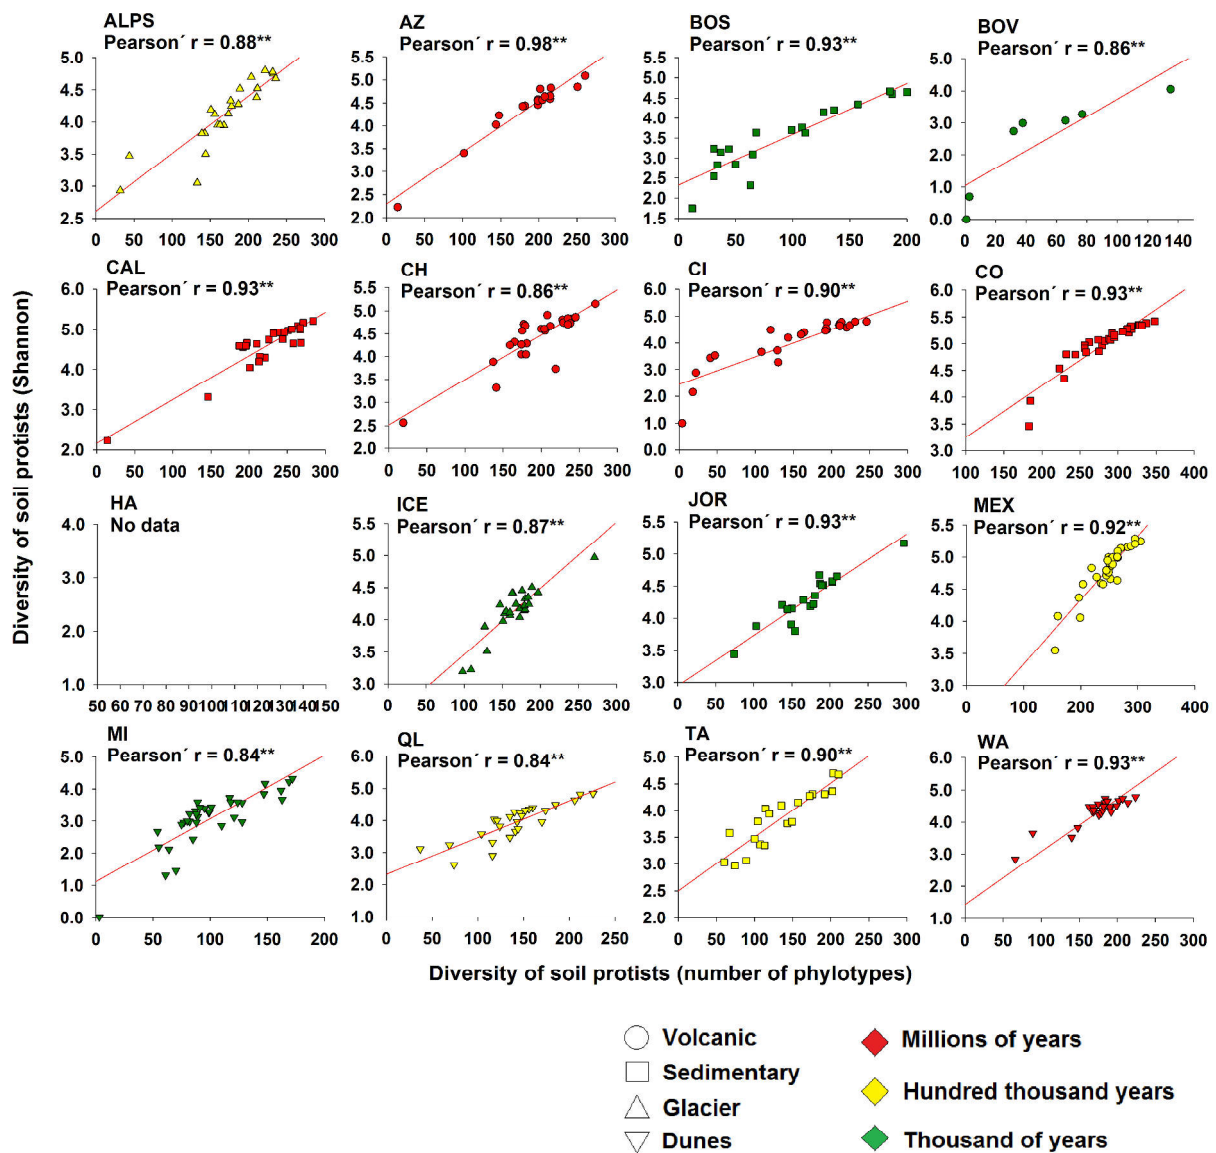

**Figure S3.** Relationships between number of phylotypes and Shannon diversity of soil protists in 16 globally distributed soil chronosequences.

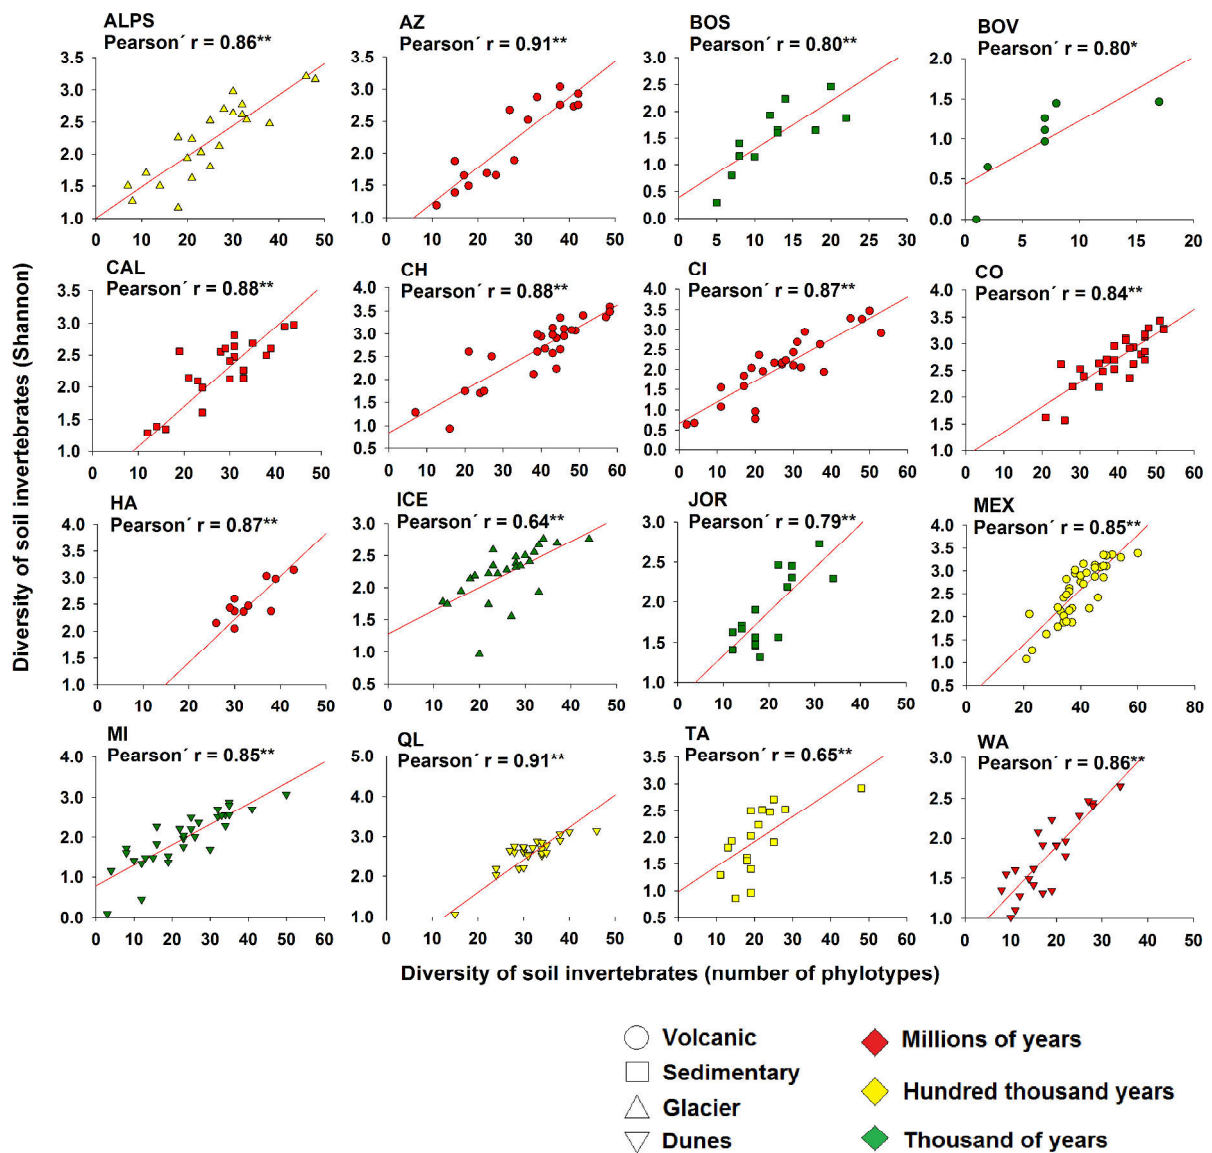

**Figure S4.** Relationships between number of phylotypes and Shannon diversity of soil invertebrates in 16 globally distributed soil chronosequences.

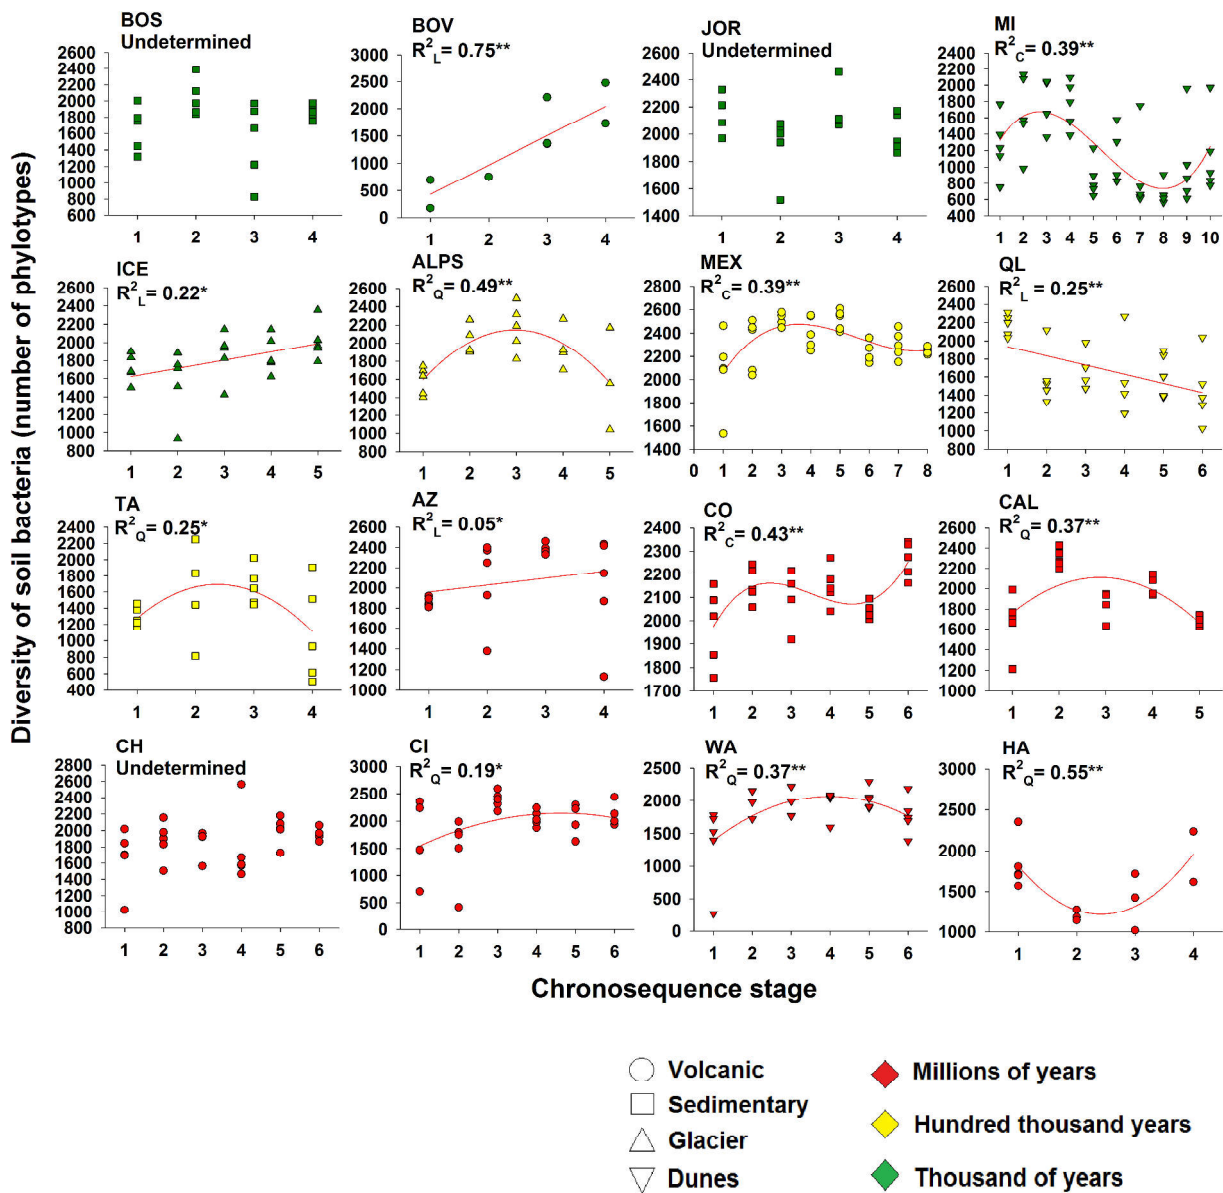

**Figure S5.** Relationships between chronosequence stage and the diversity of soil bacteria in 16 globally distributed soil chronosequences. No line indicates that a model could not be fitted to the data.

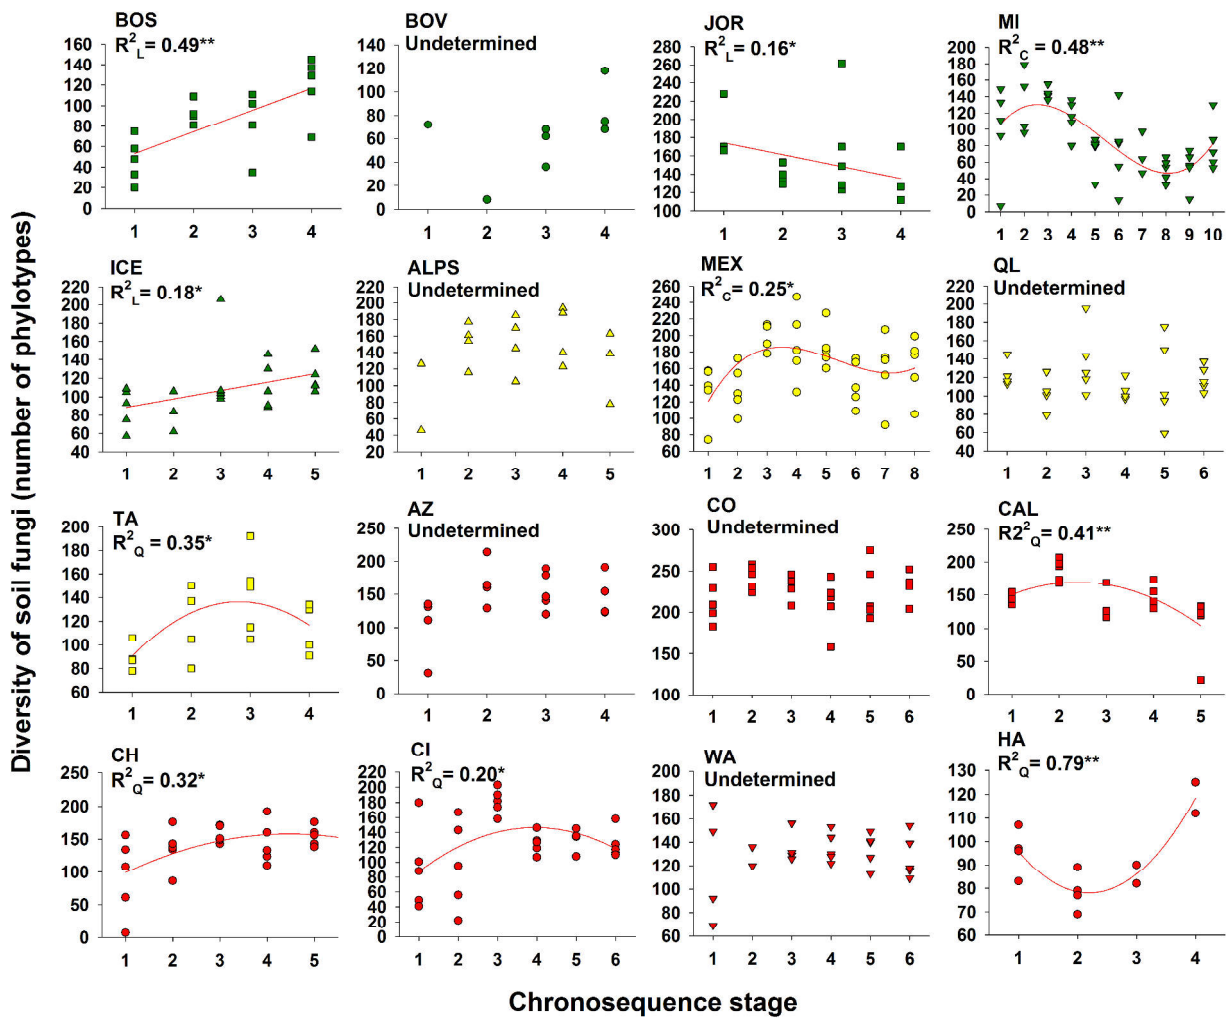

**Figure S6.** Relationships between chronosequence stage and the diversity of soil fungi in 16 globally distributed soil chronosequences. No line indicates that a model could not be fitted to the data.

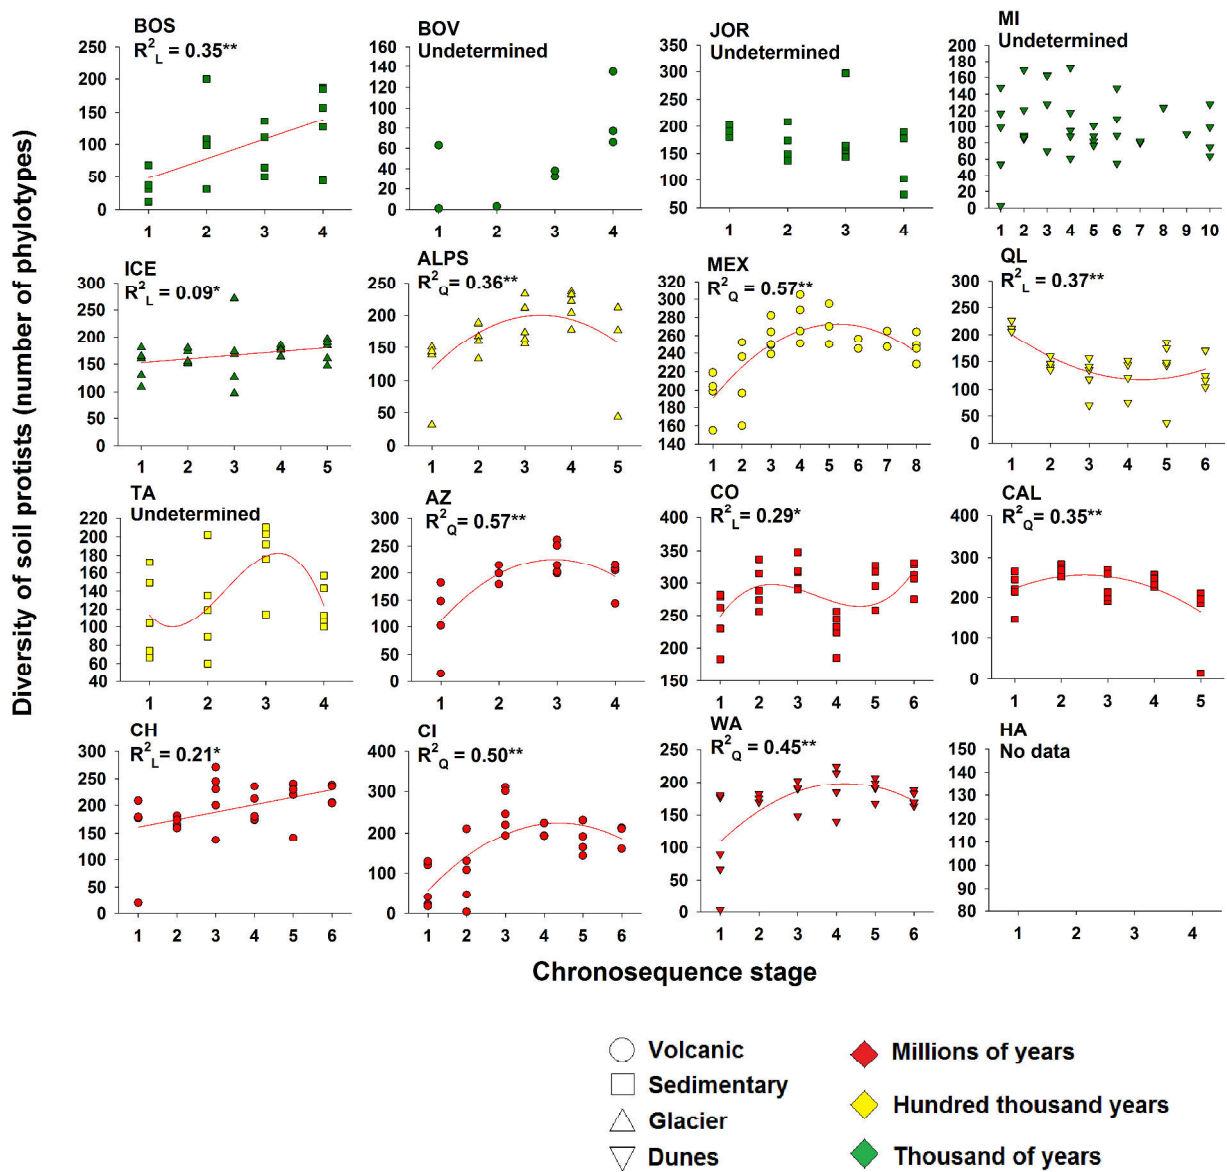

**Figure S7.** Relationships between chronosequence stage and the diversity of soil protists in 16 globally distributed soil chronosequences. No line indicates that a model could not be fitted to the data.

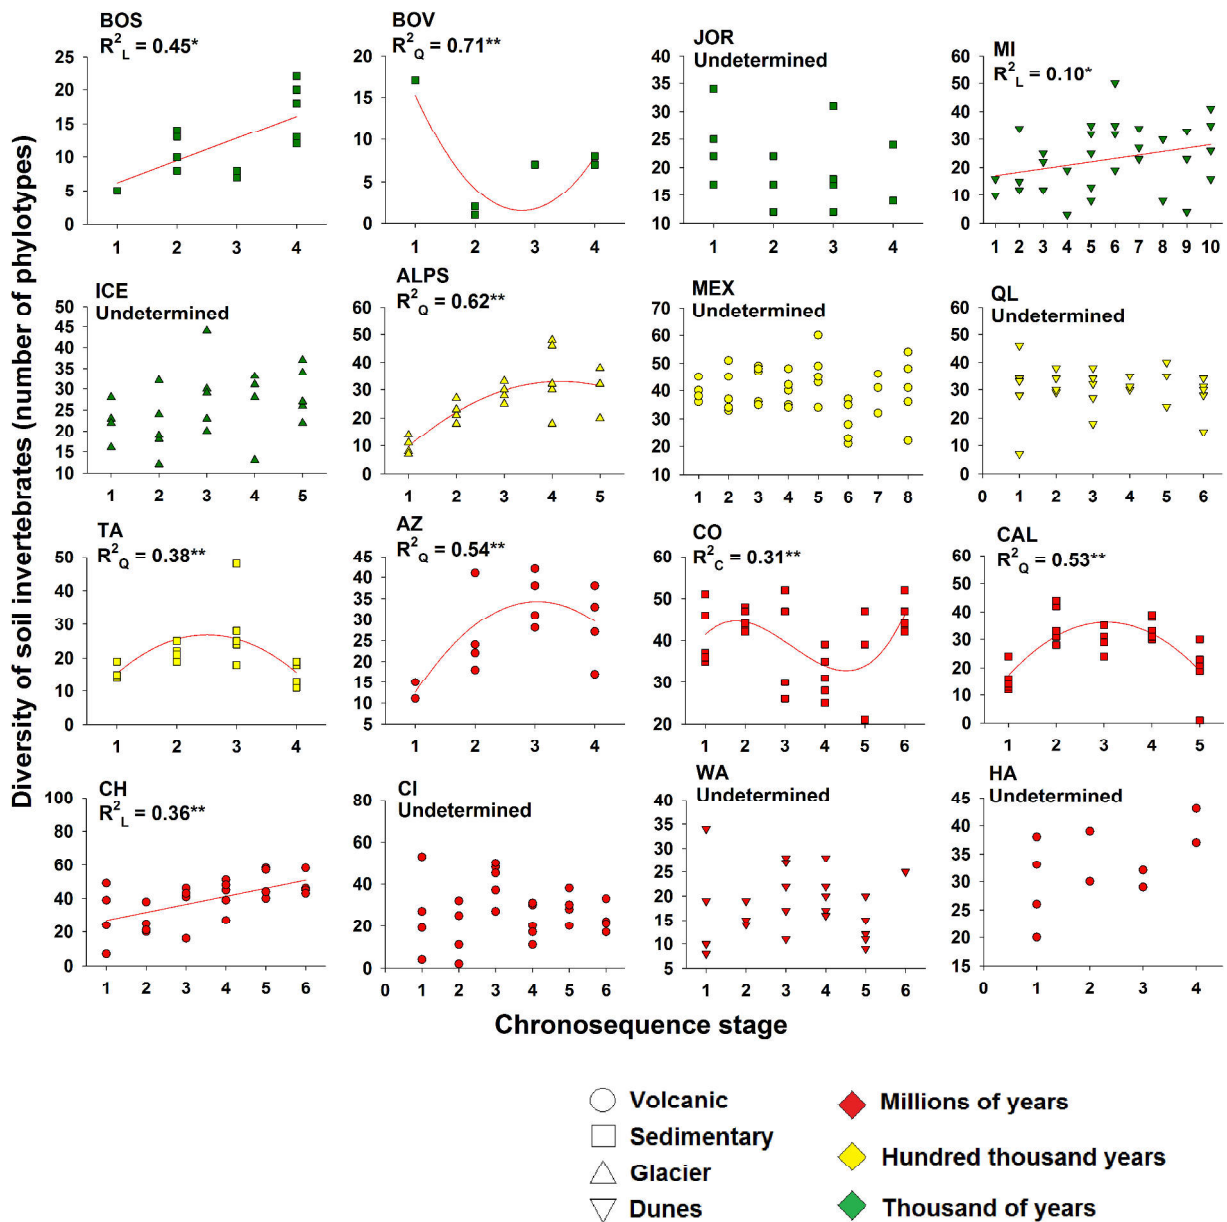

**Figure S8.** Relationships between chronosequence stage and the diversity of soil invertebrates in 16 globally distributed soil chronosequences. No line indicates that a model could not be fitted to the data.



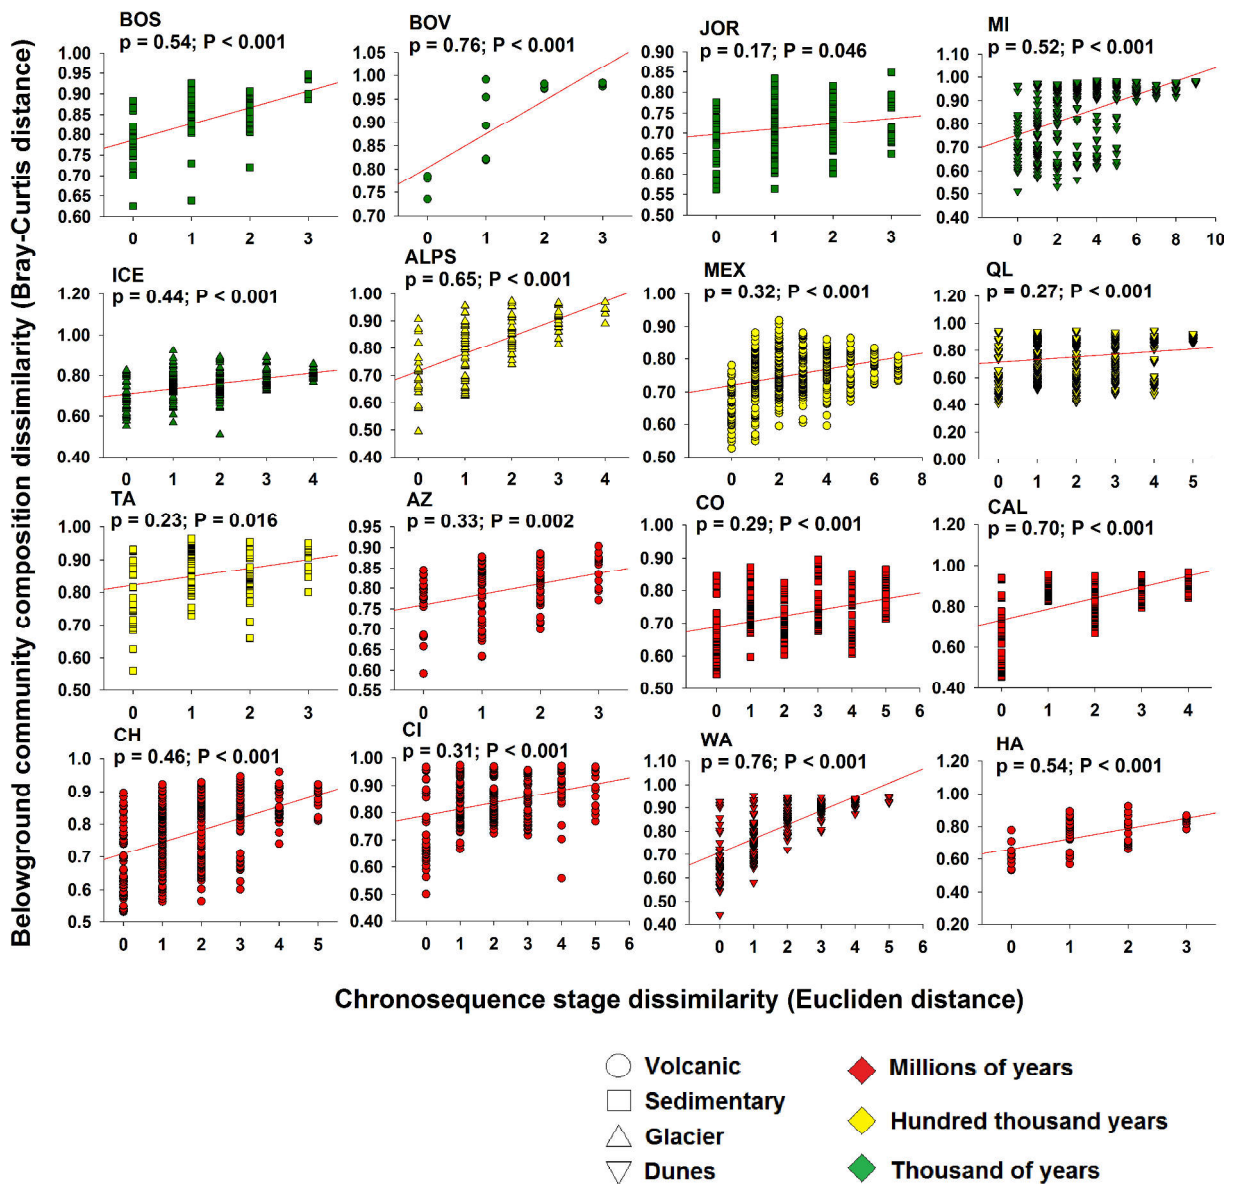

**Figure S9.** Mantel correlation (Spearman,  $\rho$ ) between belowground community dissimilarity (bacteria, fungi, protists and invertebrates) (Bray-Curtis distance) and chronosequence stage dissimilarity (Euclidean matrix of distance that express the similarity pair to pair between two chronosequence stages) in the 16 soil chronosequences studied.

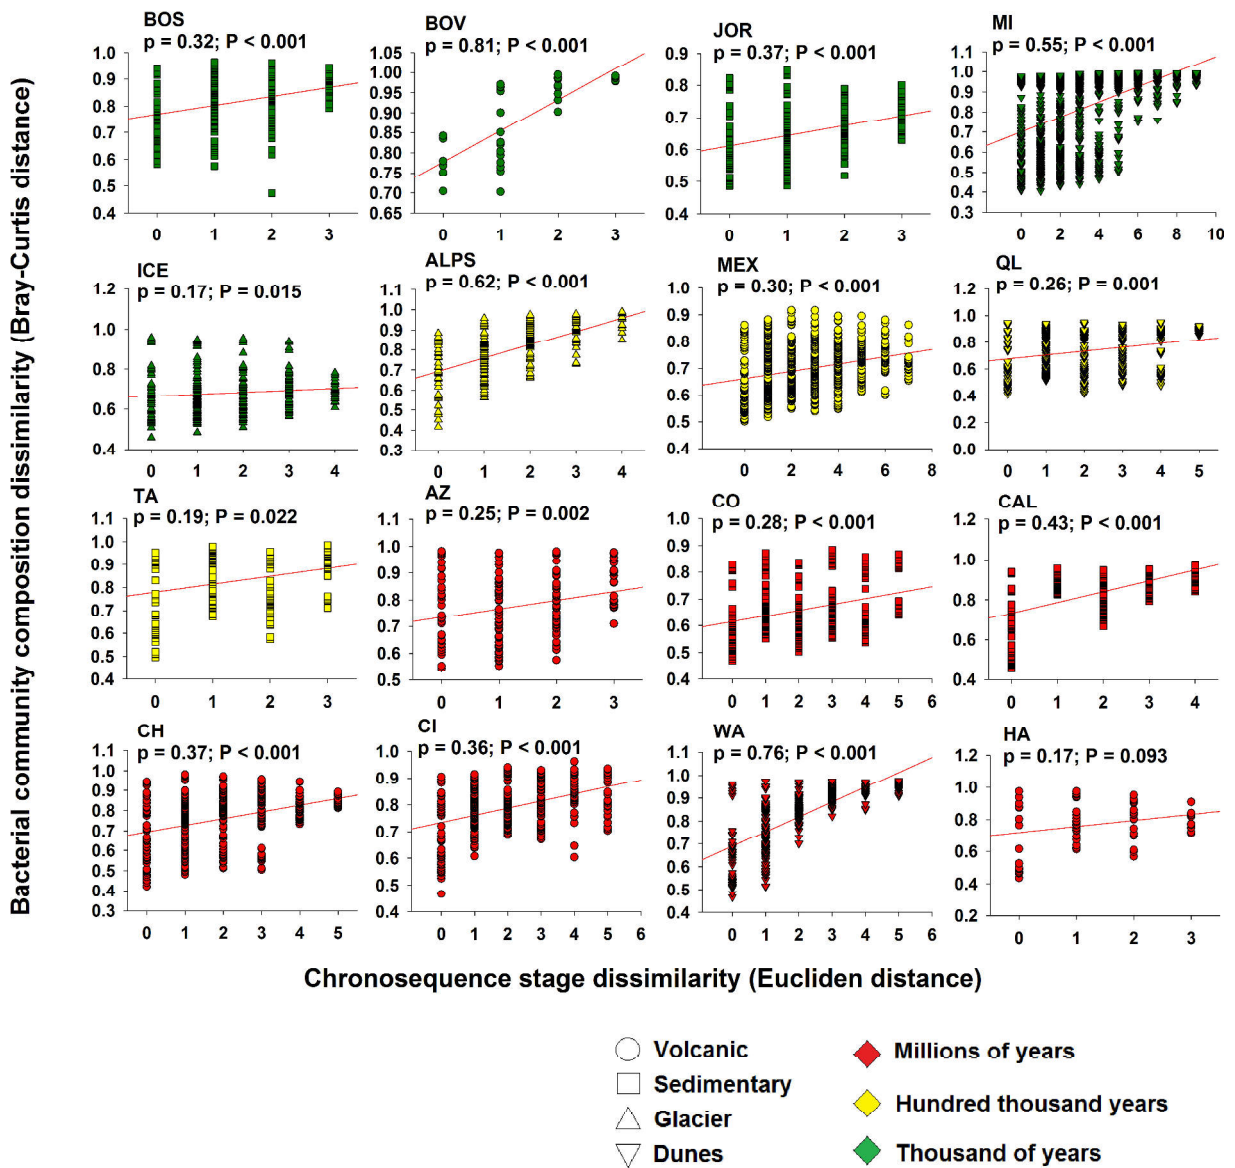

**Figure S10.** Mantel correlation (Spearman,  $p$ ) between soil bacterial community dissimilarity (Bray-Curtis distance) and stage dissimilarity (Euclidean distance) in 16 globally distributed soil chronosequences.

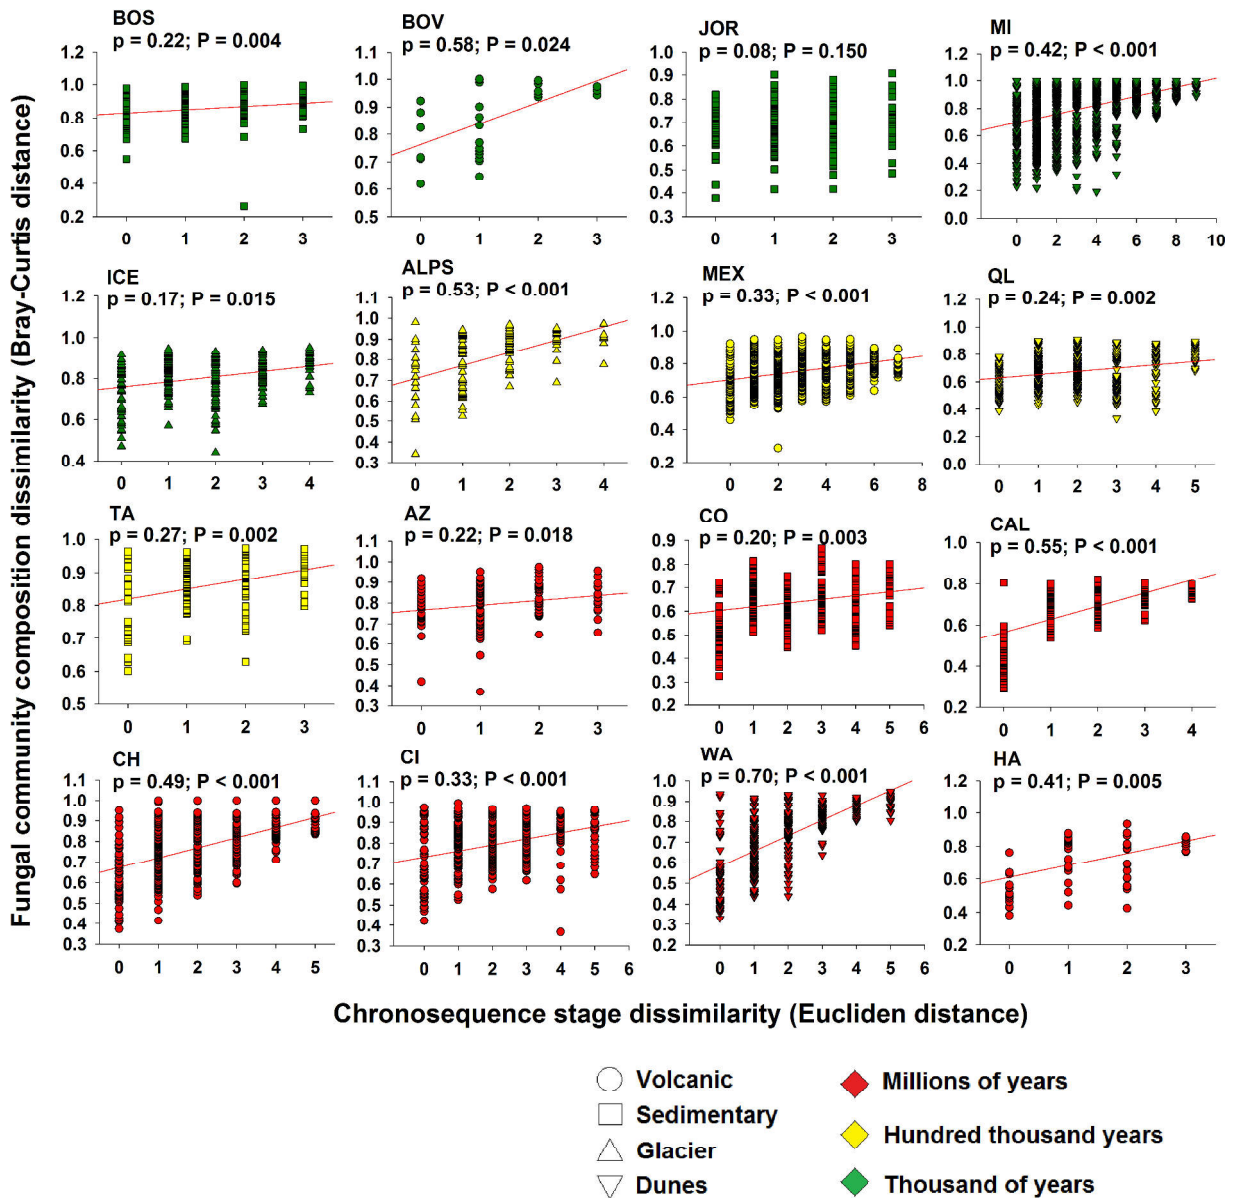

**Figure S11.** Mantel correlation (Spearman,  $\rho$ ) between soil fungal community dissimilarity (Bray-Curtis distance) and stage dissimilarity (Euclidean distance) in 16 globally distributed soil chronosequences.

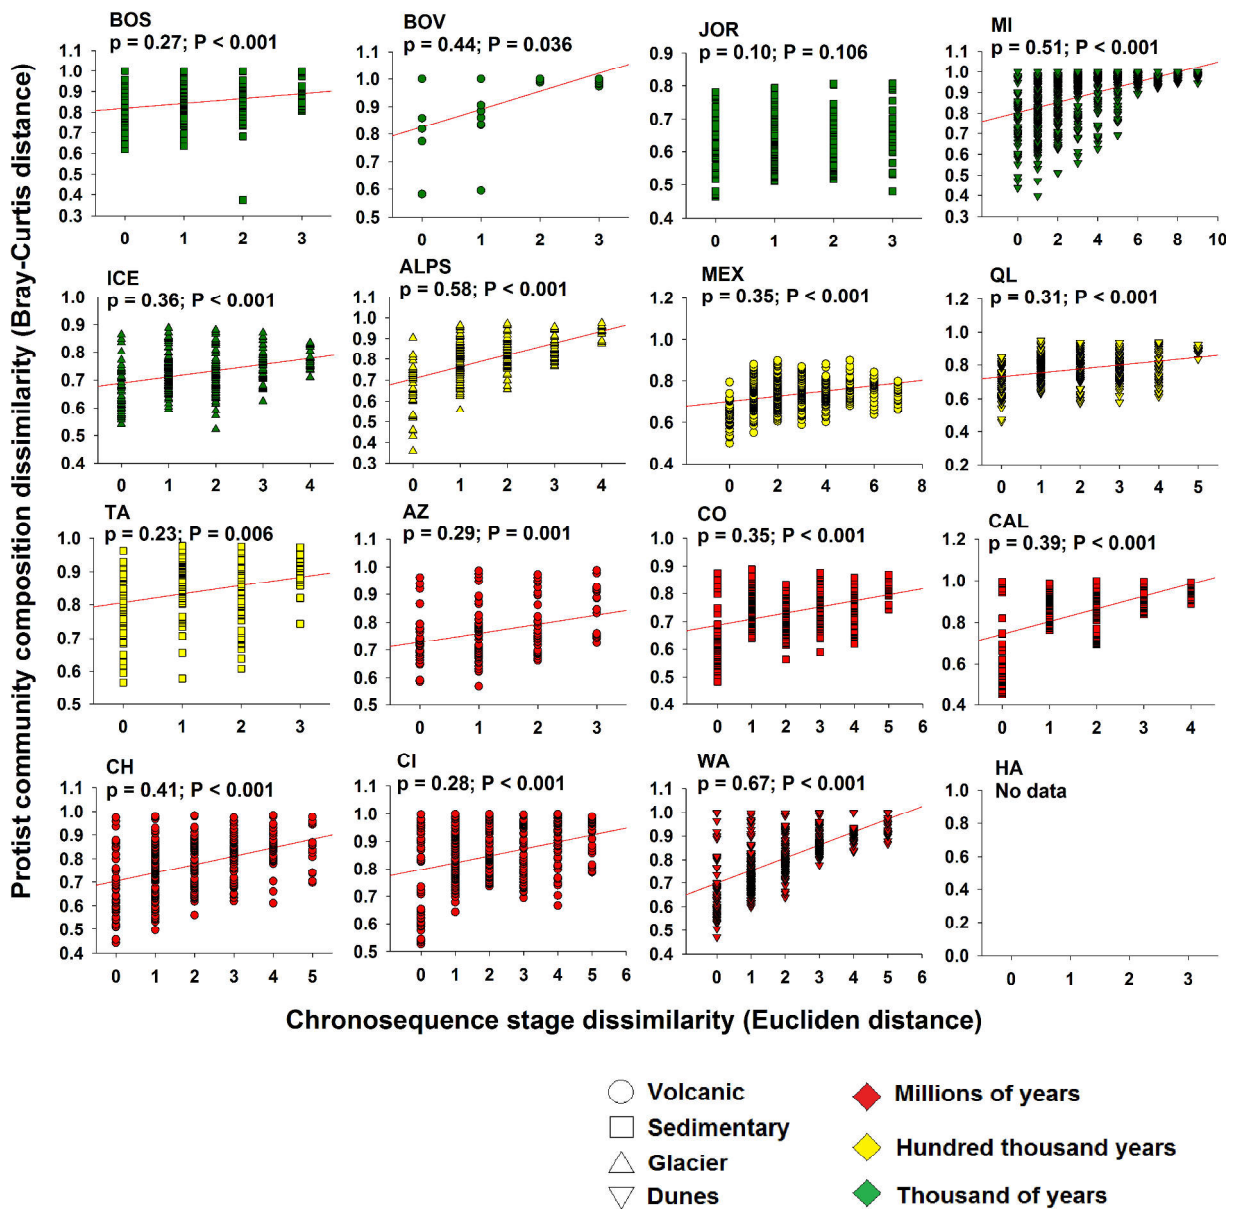

**Figure S12.** Mantel correlation (Spearman,  $\rho$ ) between soil protist community dissimilarity (Bray-Curtis distance) and stage dissimilarity (Euclidean distance) in 16 globally distributed soil chronosequences.

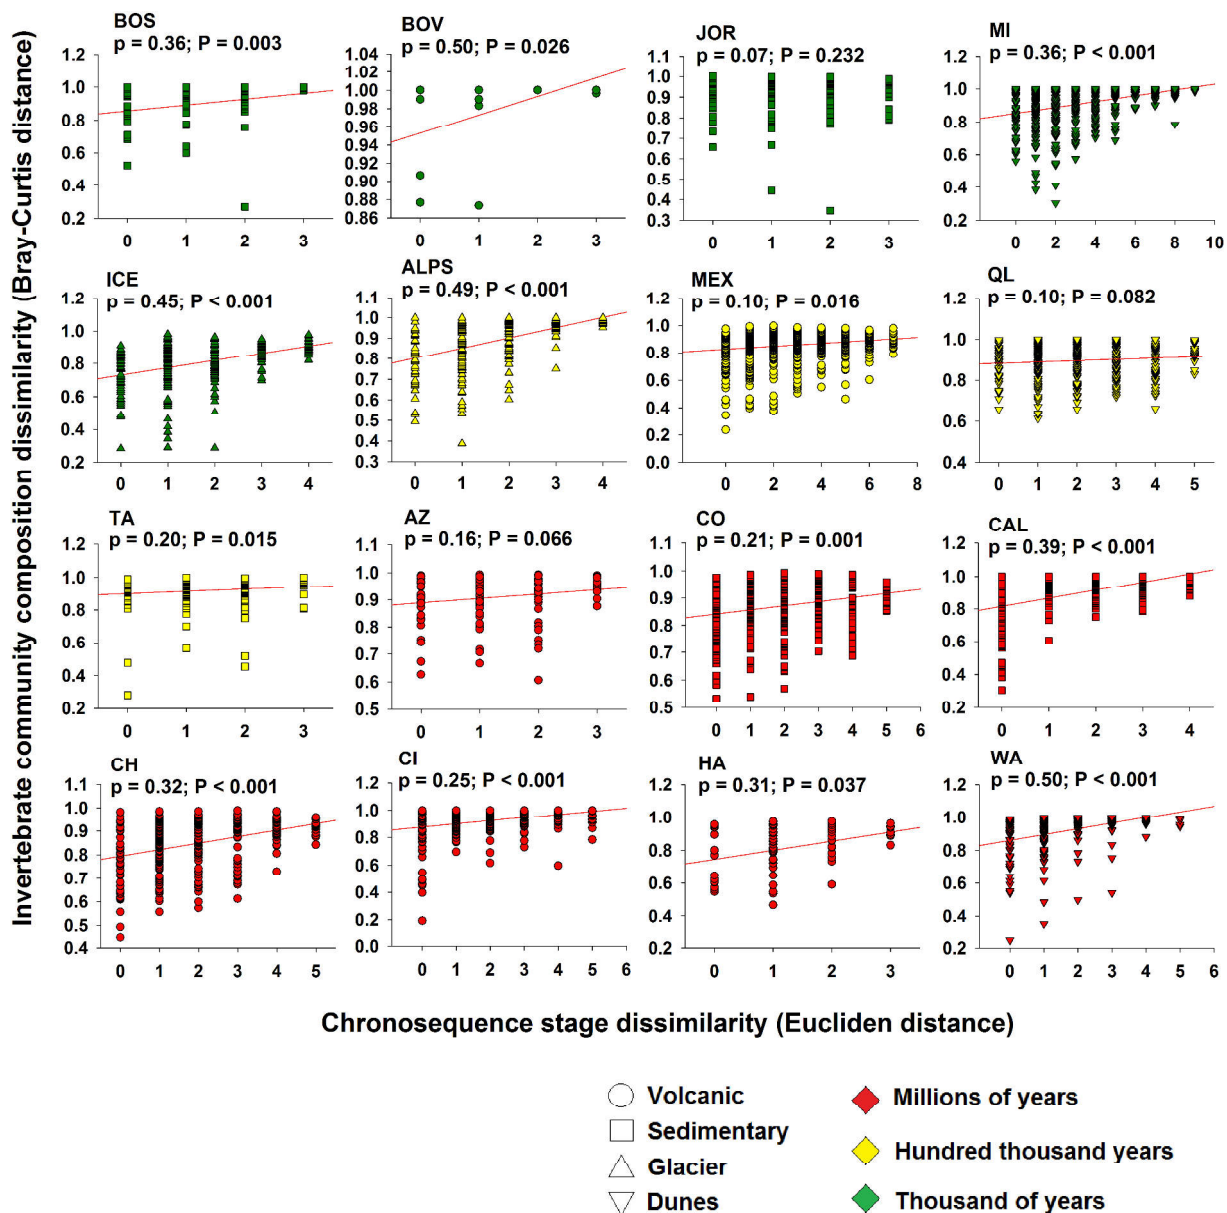

**Figure S13.** Mantel correlation (Spearman,  $p$ ) between soil invertebrate' community dissimilarity (Bray-Curtis distance) and stage dissimilarity (Euclidean distance) in 16 globally distributed soil chronosequences.

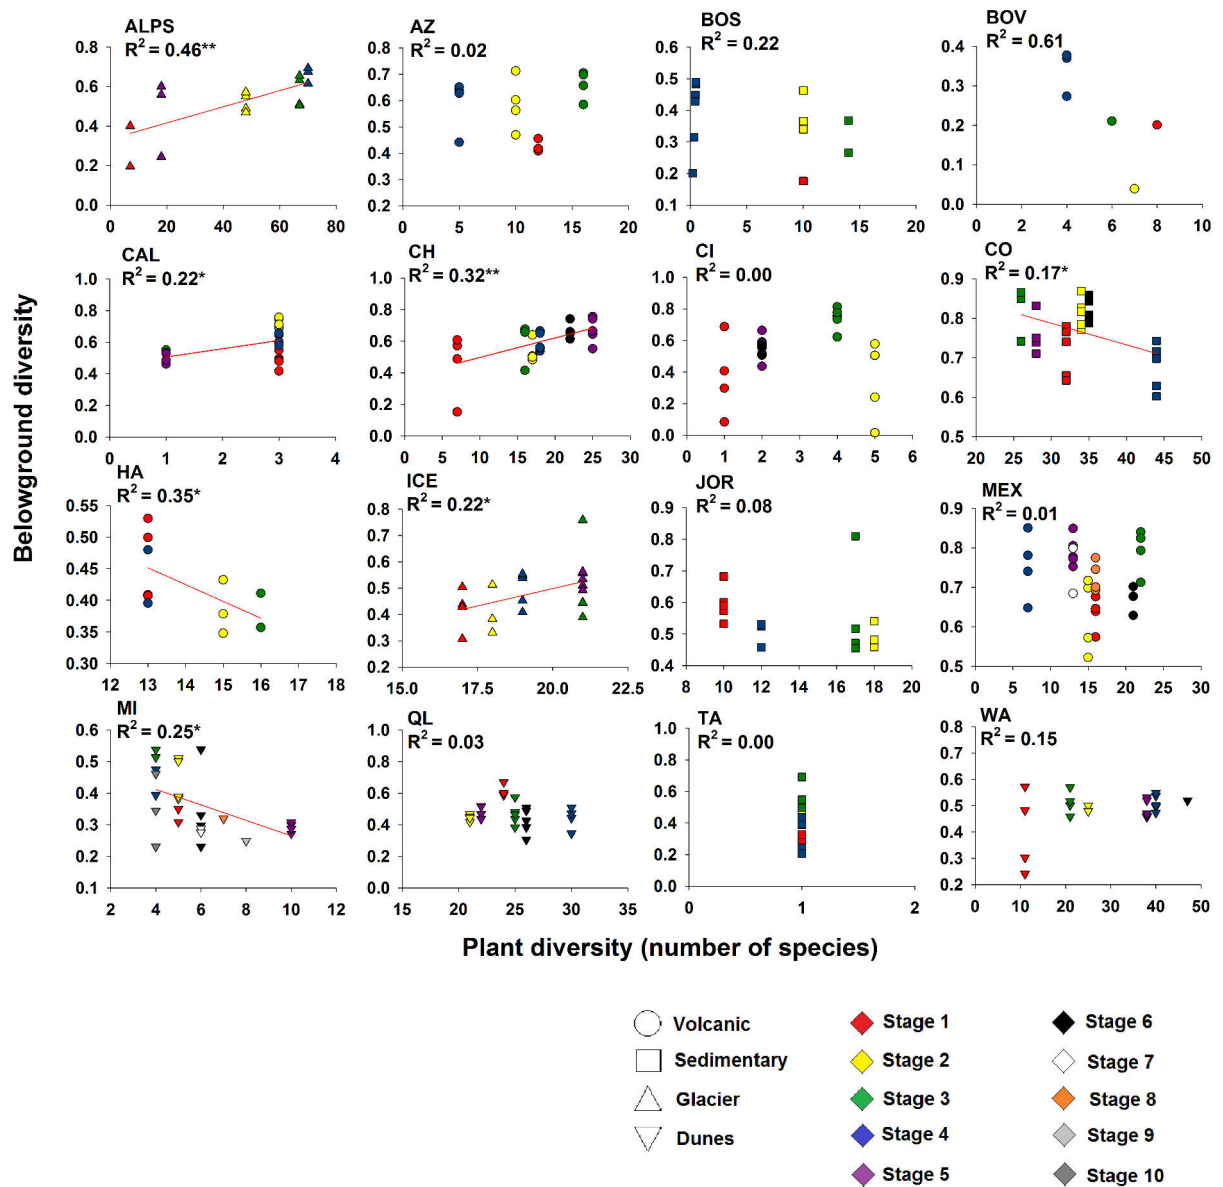

**Figure S14.** Relationships between belowground and plant diversity in 16 globally distributed soil chronosequences.

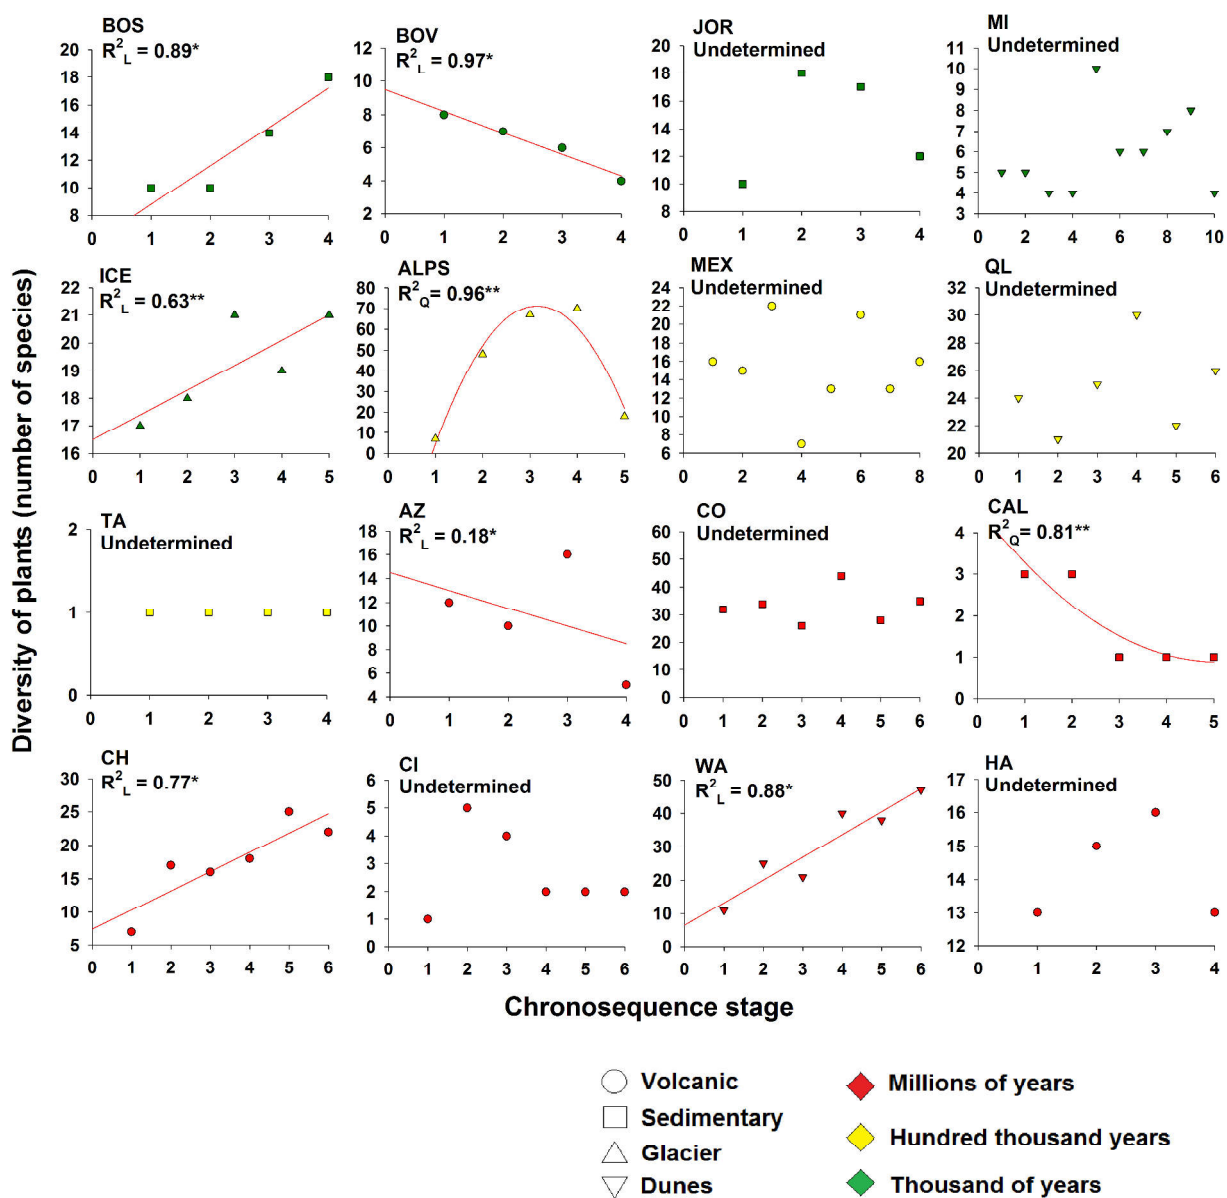

**Figure S15.** Relationships between chronosequence stage and plant diversity in 16 globally distributed soil chronosequences. Texture = % clay + silt.

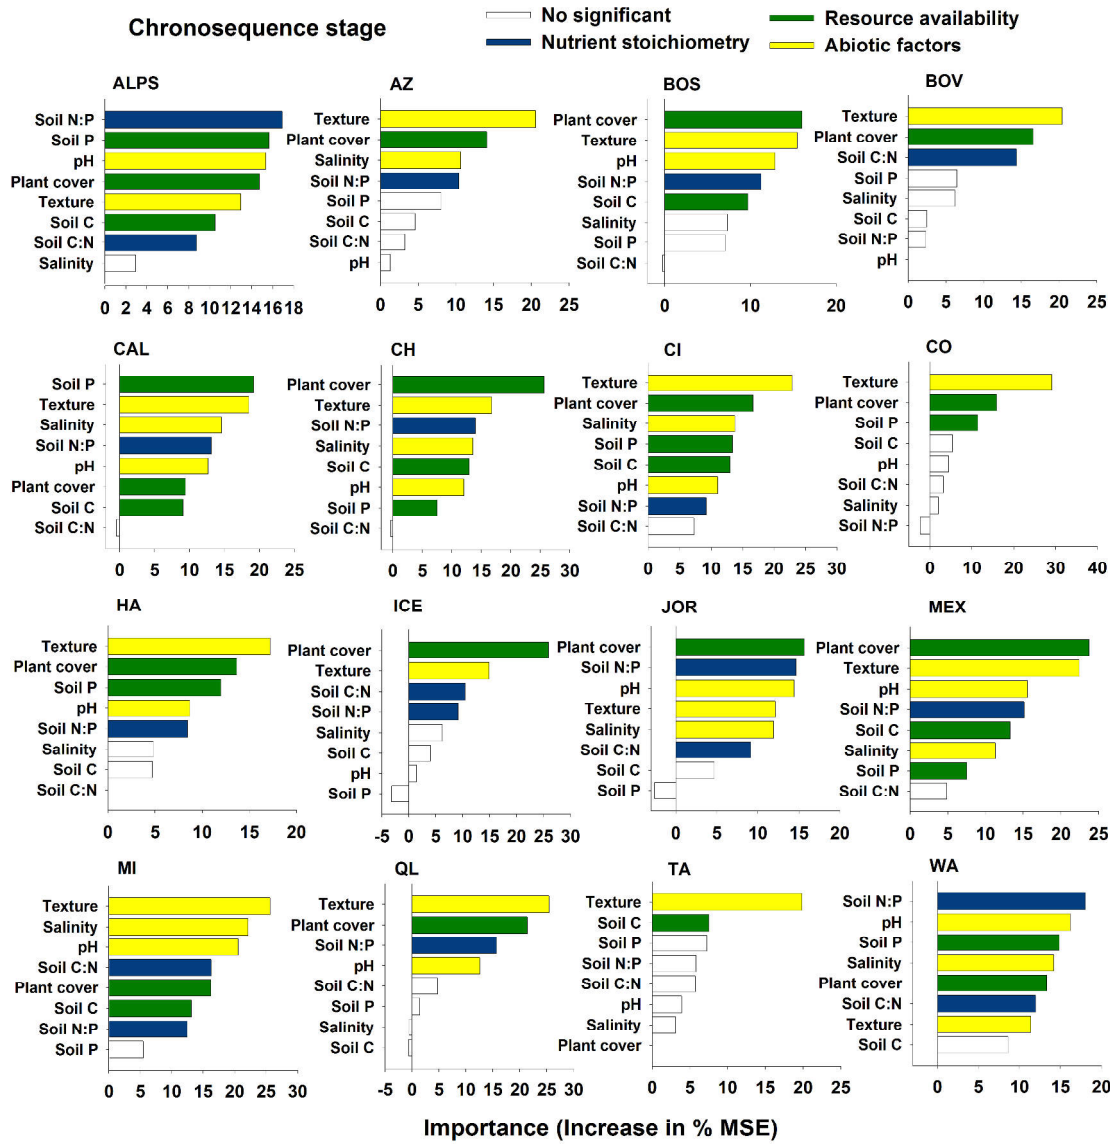

**Figure S16.** Important environmental predictors of age-based stage across 16 globally distributed soil chronosequences, identified using random forest modeling. MSE = Mean Square Error. No bar = 0. Texture = % clay + silt.



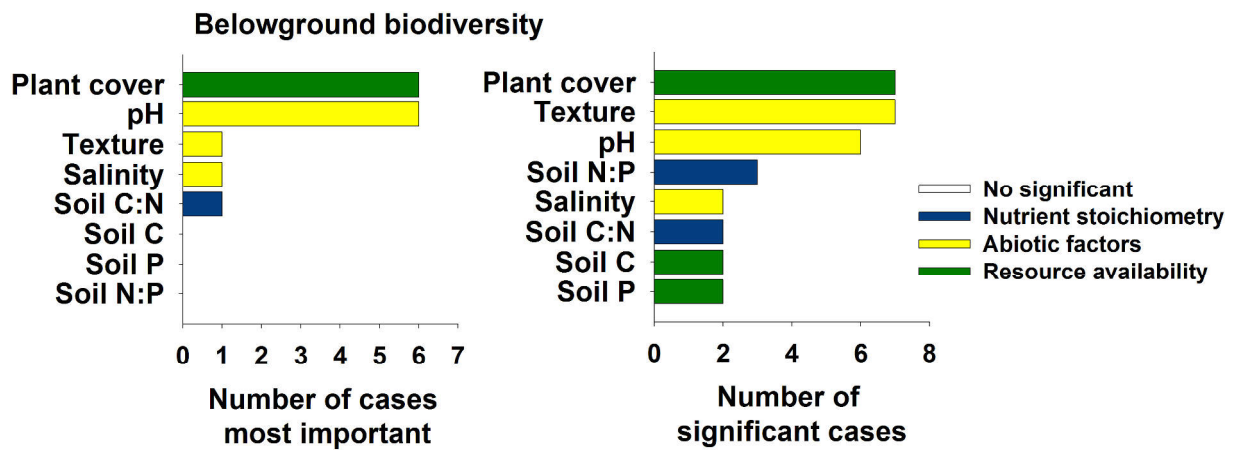

**Figure S17.** Ecological drivers of belowground biodiversity during pedogenesis. Summary for the most important predictors, from Random Forest modelling, of the diversity of belowground organisms across sixteen globally distributed soil chronosequences. A more detailed version of this figure can be found in Appendix S1, Fig. S18. Texture = % clay + silt.

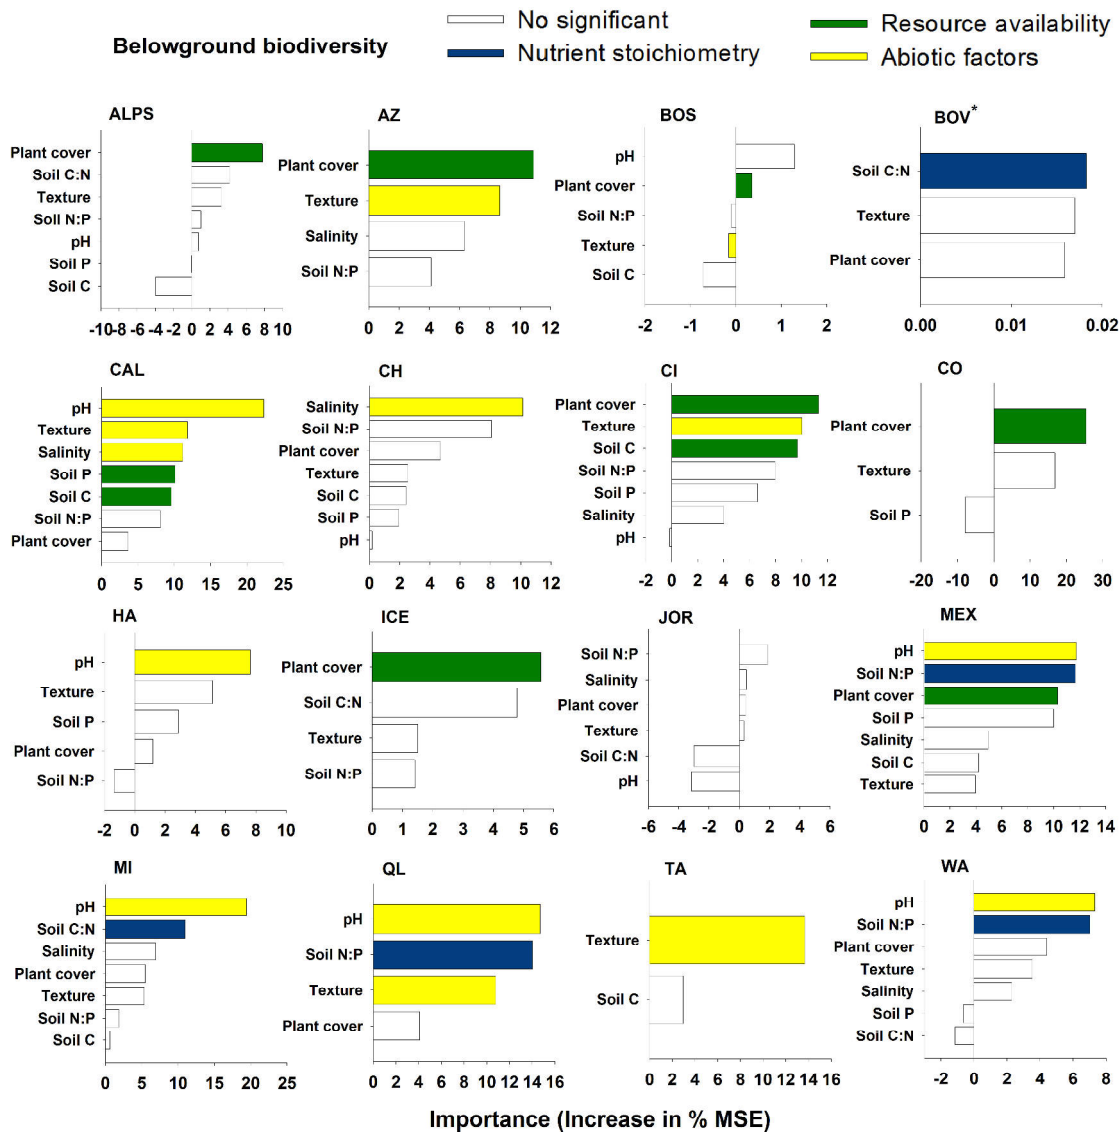

**Figure S18.** Important environmental predictors of belowground biodiversity across 16 globally distributed soil chronosequences, identified using random forest modeling. MSE = Mean Square Error. \*Increase in Node Purity was used as an alternative importance metric for this analysis, as MSE did not work in this case. No bar = 0. No significant =  $P > 0.05$ . Colors highlight significant predictors. Texture = % clay + silt.

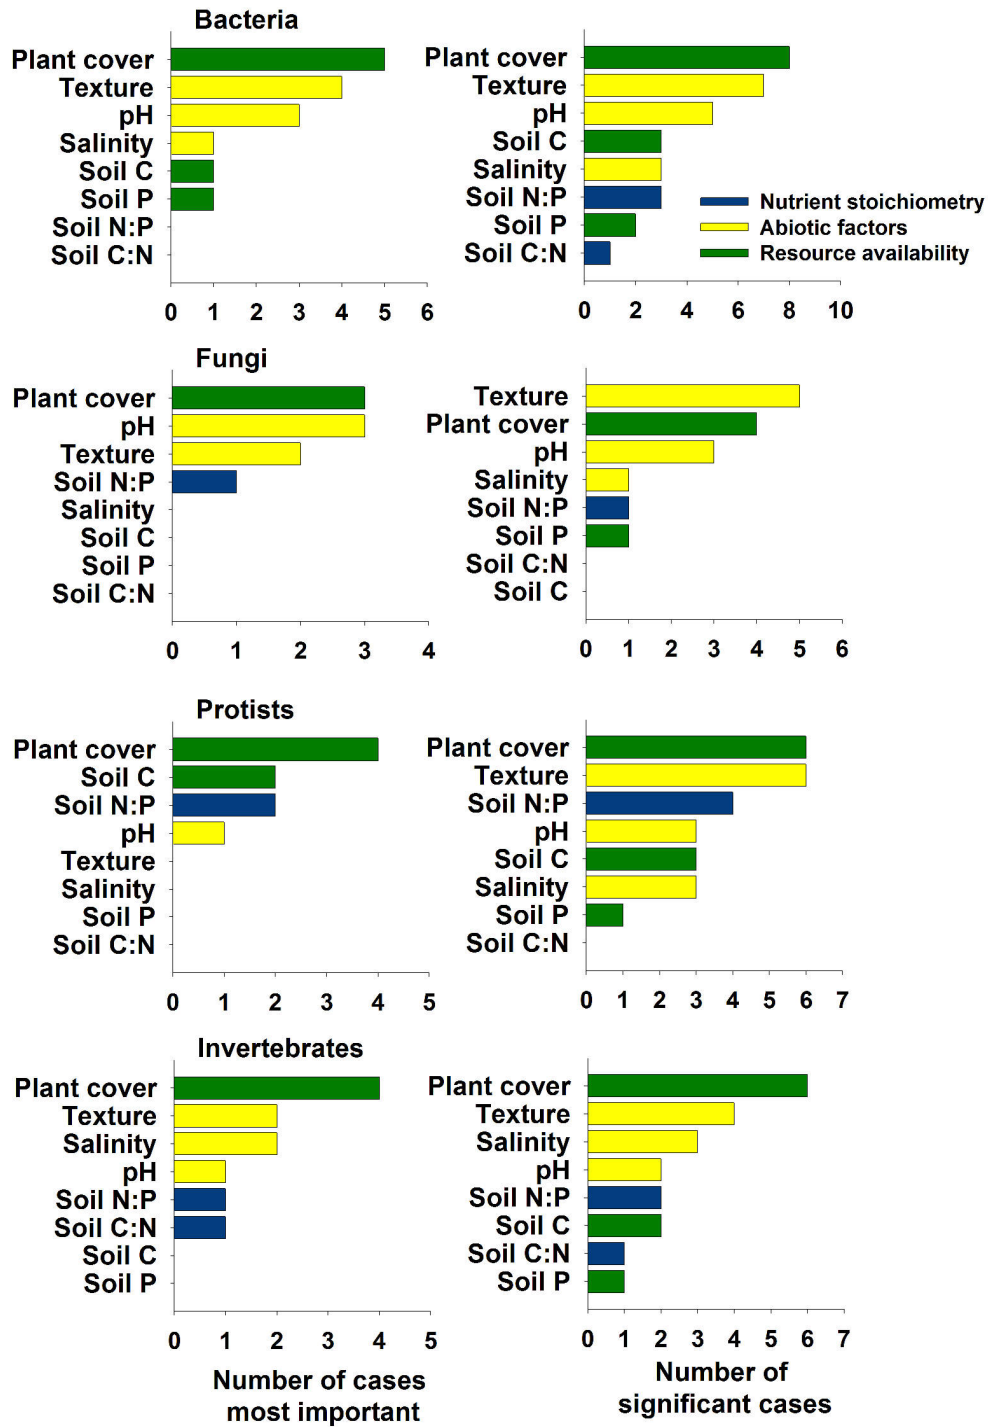

**Figure S19.** Summary for the most important predictors from Random Forest modeling of the diversity of soil bacteria, fungi, protists and invertebrates across 16 globally distributed soil chronosequences. MSE = Mean Square Error. No bar = 0 cases. Texture = % clay + silt.

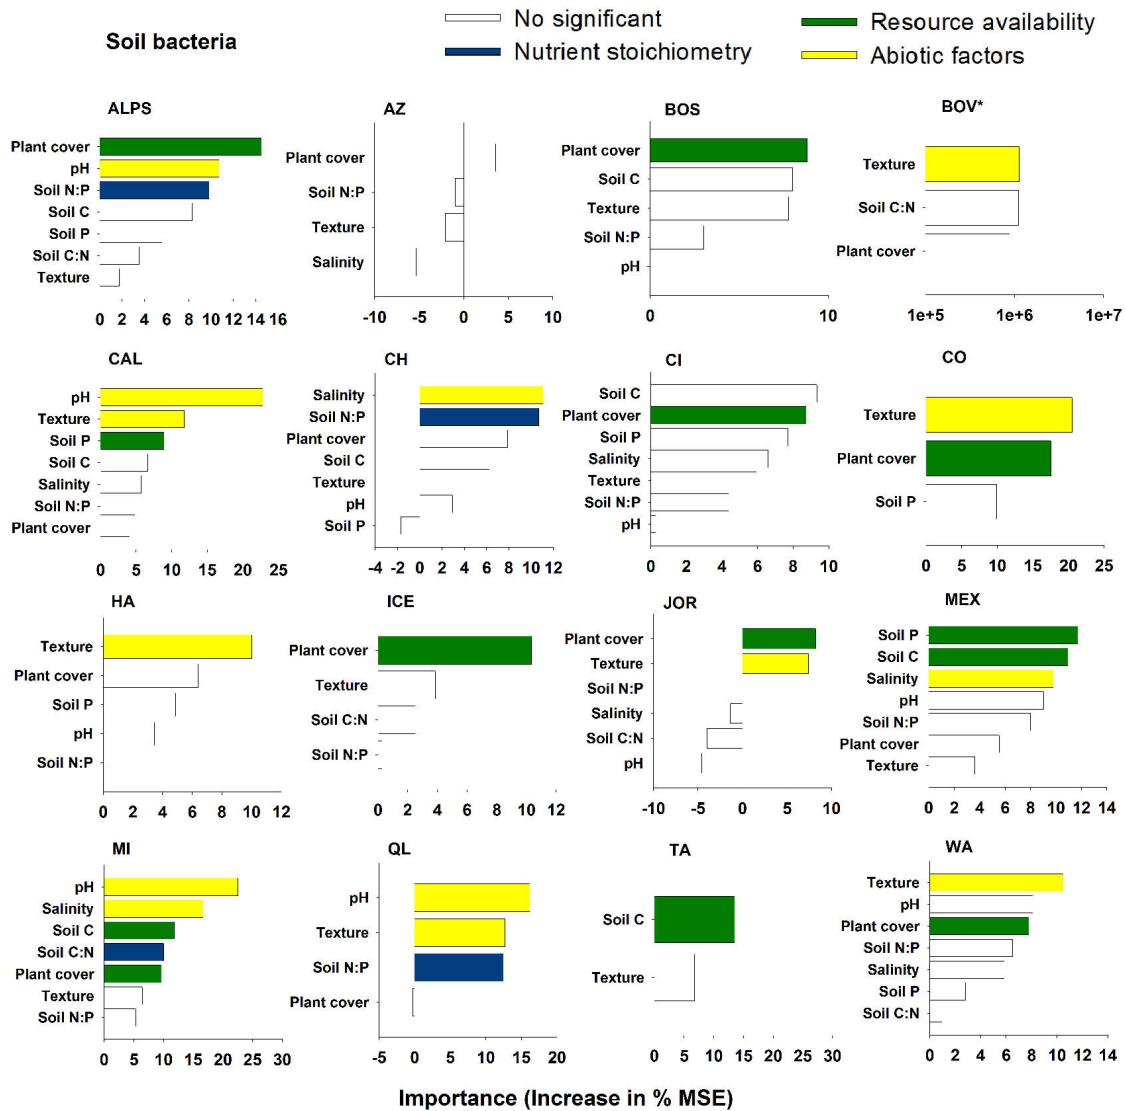

**Figure S20.** Important environmental predictors of soil bacterial diversity across 16 globally distributed soil chronosequences, identified using random forest modeling. MSE = Mean Square Error. \*Increase in Node Purity was used as an alternative importance metric for this analysis, as MSE did not work in this case. No bar = 0. No significant =  $P > 0.05$ . Colors highlight significant predictors. Texture = % clay + silt.

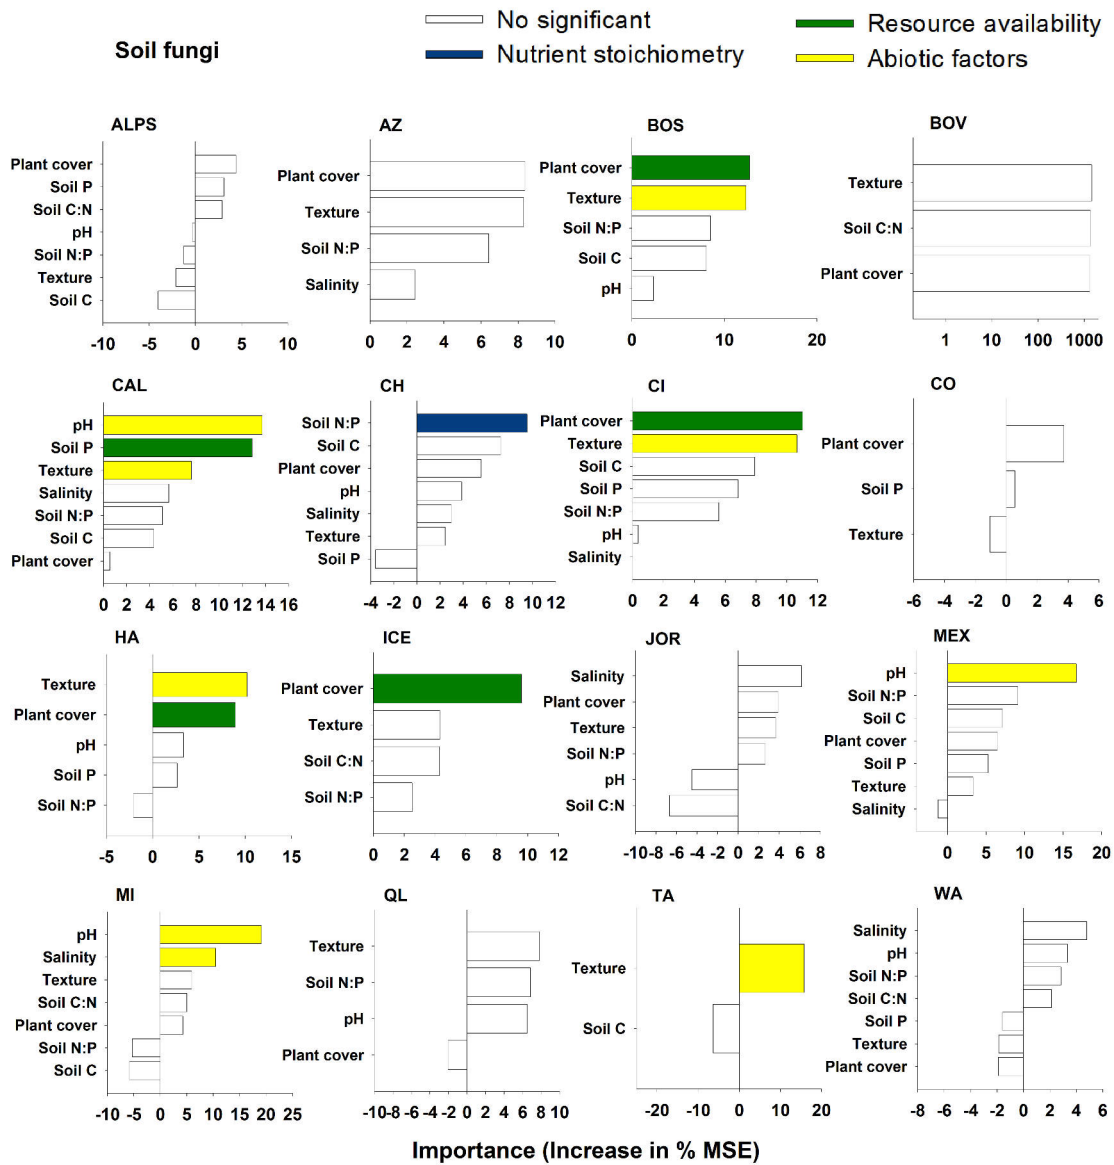

**Figure S21.** Important environmental predictors of soil fungal diversity across 16 globally distributed soil chronosequences, identified using random forest modeling. MSE = Mean Square Error. No bar = 0. No significant =  $P > 0.05$ . Colors highlight significant predictors. Texture = % clay + silt.

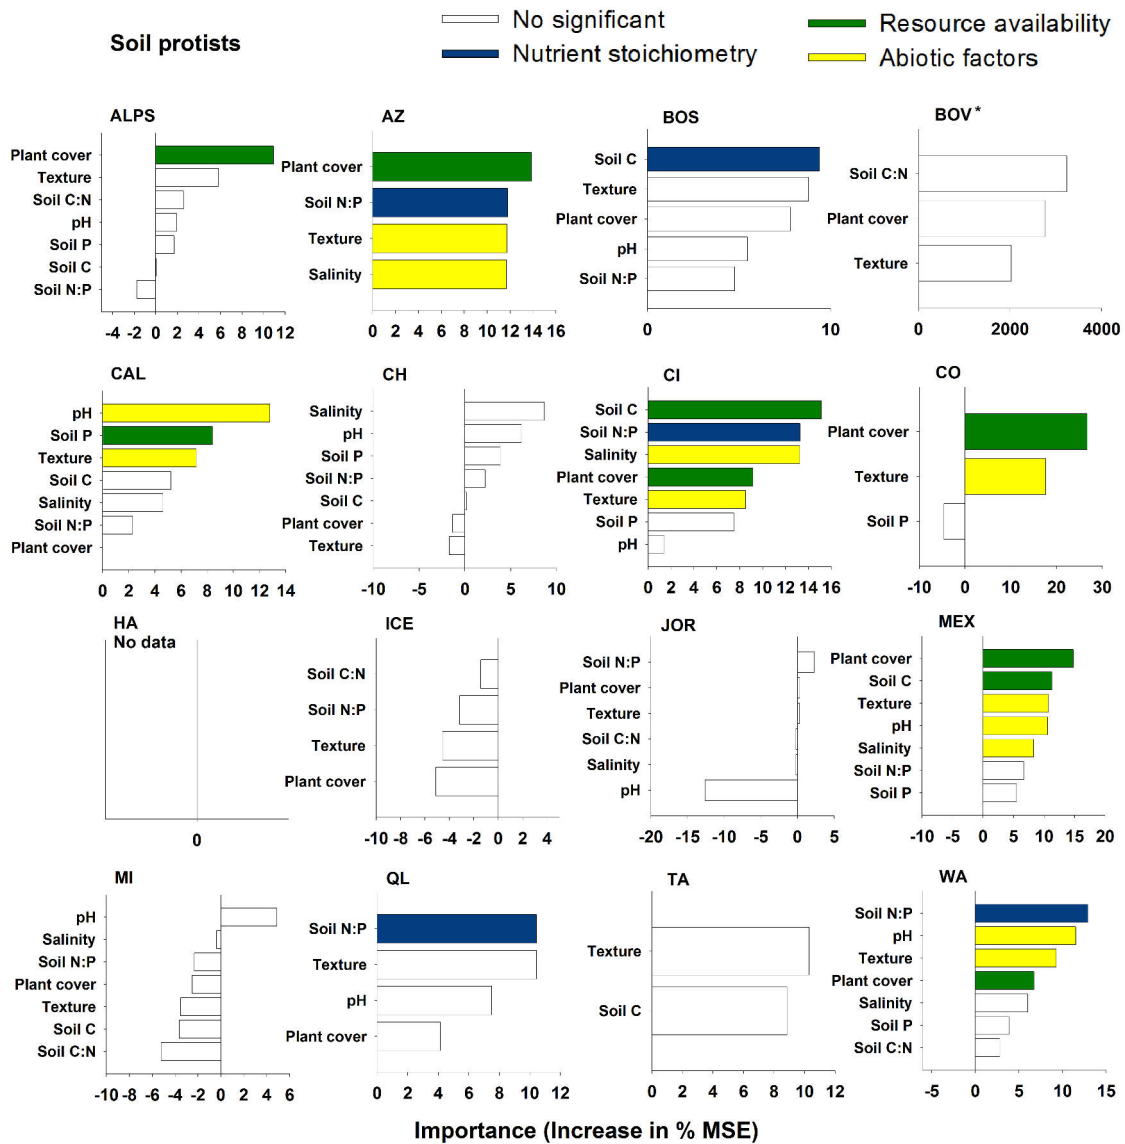

**Figure S22.** Important environmental predictors of soil protists diversity across 16 globally distributed soil chronosequences, identified using random forest modeling. MSE = Mean Square Error. \*Increase in Node Purity was used as an alternative importance metric for this analysis, as MSE did not work in this case. No bar = 0. No significant =  $P > 0.05$ . Colors highlight significant predictors. Texture = % clay + silt.

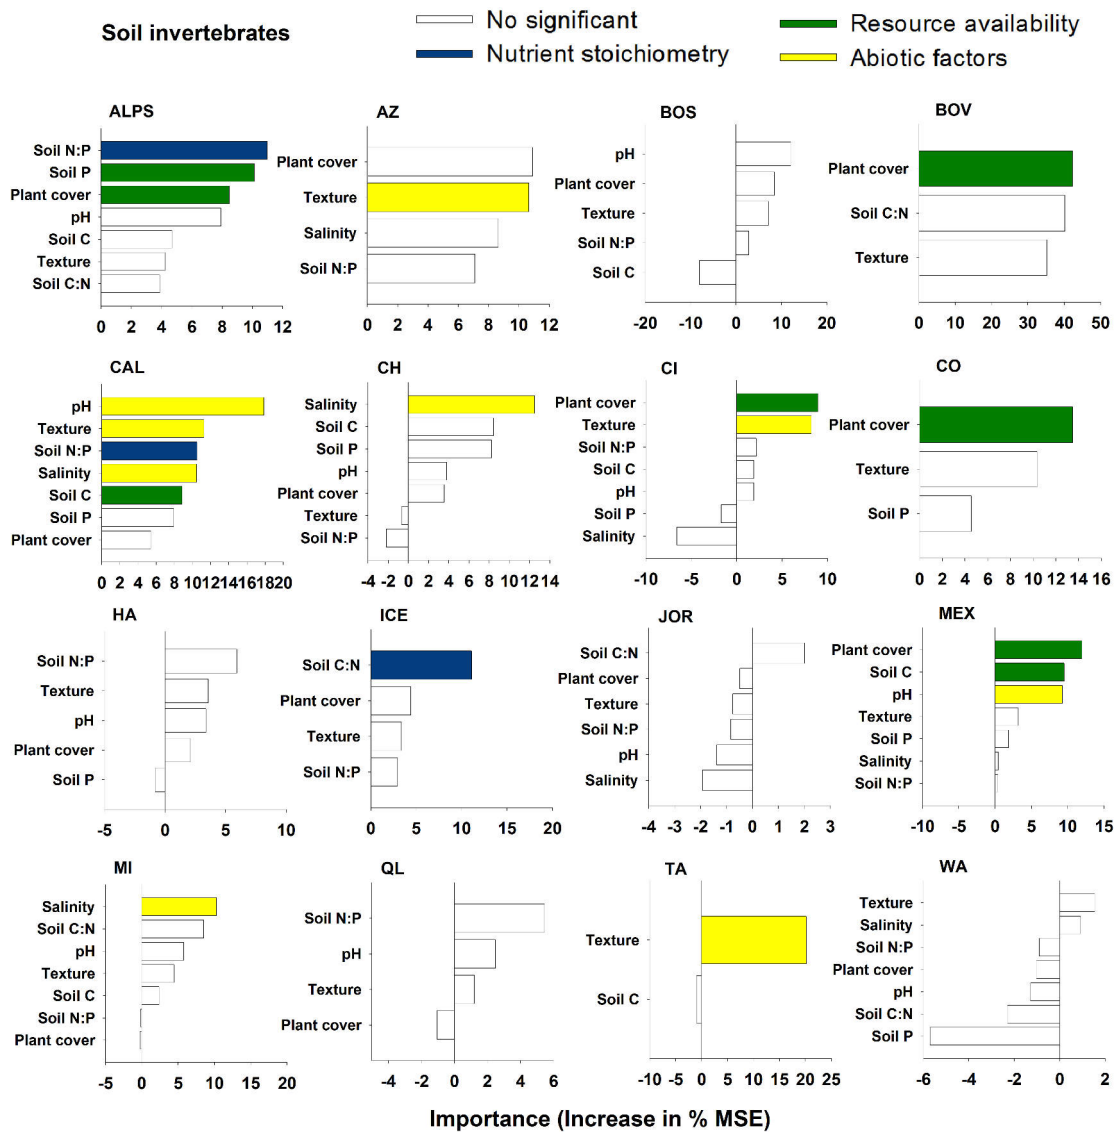

**Figure S23.** Important environmental predictors of soil invertebrate diversity across 16 globally distributed soil chronosequences, identified using random forest modeling. MSE = Mean Square Error. No bar = 0. No significant =  $P > 0.05$ . Colors highlight significant predictors. Texture = % clay + silt.

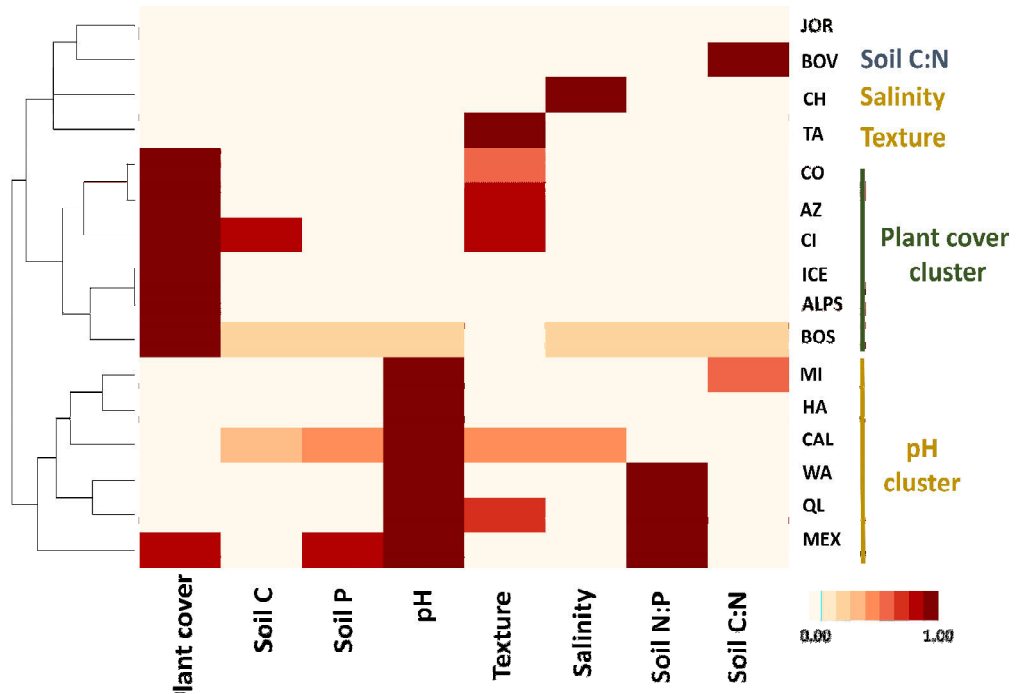

**Figure S24.** Hierarchical clustering using information on the importance of environmental factors in predicting belowground biodiversity (from Random Forest modeling) to identify the major ecological patterns driving the fate of belowground biodiversity during pedogenesis across 16 global distributed soil chronosequences.



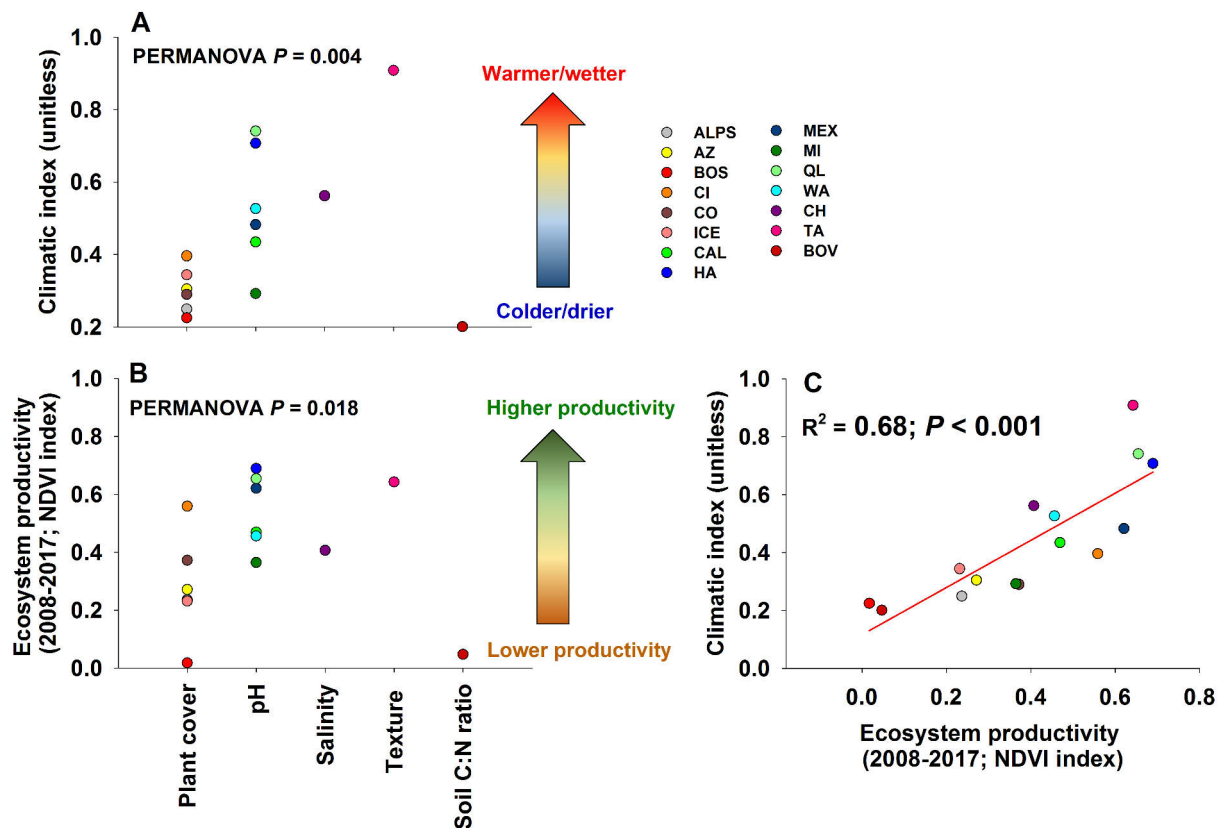

**Figure S25.** Mean ecosystem productivity and climatic index –standardized averaged for mean precipitation and temperature– in 16 globally distributed soil chronosequences. Low levels of climatic index represents colder and drier ecosystems. Chronosequences where belowground biodiversity is predicted by plant cover have significantly lower plant productivity and climatic index (temperature|precipitation) than those where soil biodiversity is predicted by soil pH. For ecosystem productivity, we used the monthly average value for Normalized Difference Vegetation Index (NDVI) for the 2008-2017 period (~10km resolution). Data was obtained from the Moderate Resolution Imaging Spectroradiometer (MODIS) aboard NASA's Terra satellites (<http://neo.sci.gsfc.nasa.gov/>).

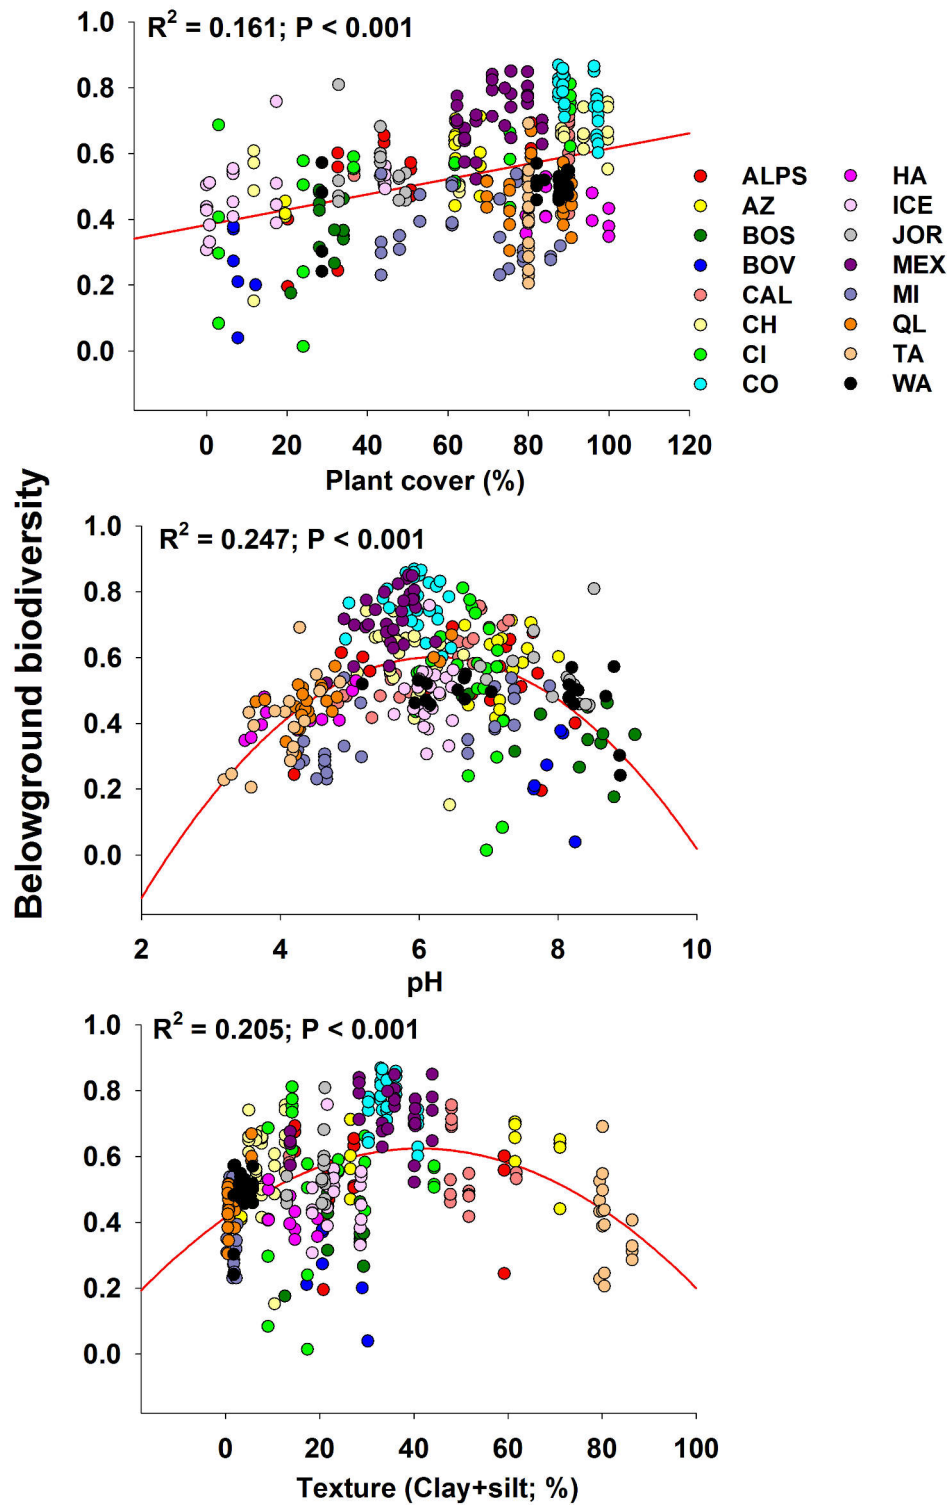

**Figure S26.** Relationships between % of plant cover, soil pH and % of soil clay+silt with the belowground biodiversity across all soil samples.

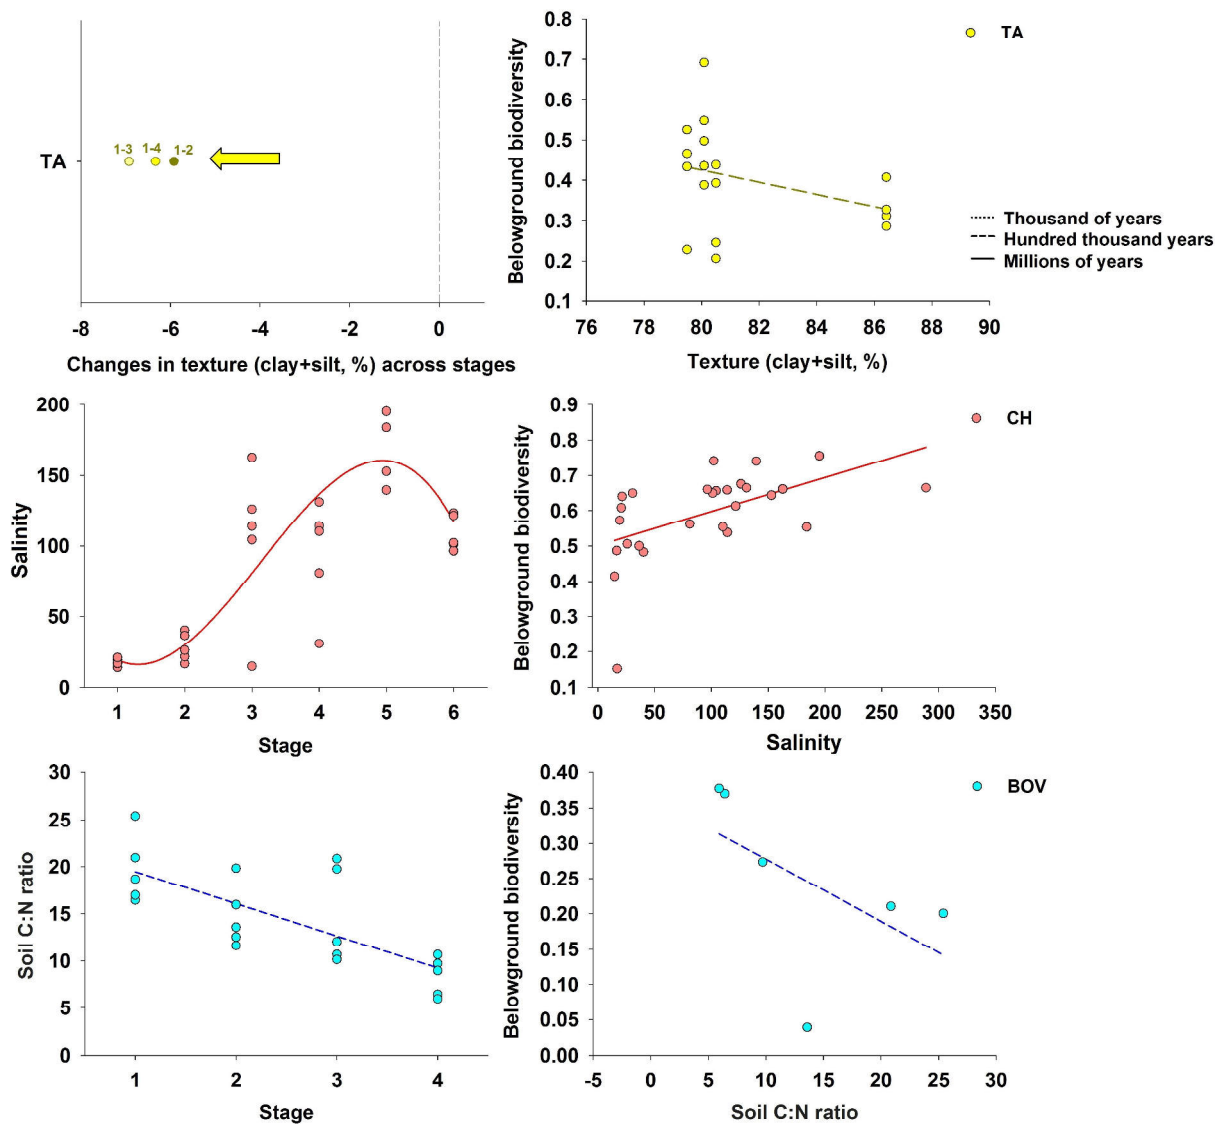

**Figure S27.** Less common ecological drivers of the fate of belowground biodiversity during pedogenesis. Reductions in % of fine texture (% of silt + clay in soil) during development correlated with increases in belowground biodiversity at the chronosequence at Taiwan (TA). Increases in salinity correlated with increases in belowground biodiversity at the chronosequence of Chile (CH). Decreases in soil C:N ratio during development correlated with increases in belowground biodiversity at the volcanic chronosequence of Bolivia (BOV). Numbers on the circles in the left upper panel indicate number of chronosequence stage. Changes in clay+silt across chronosequence stages are calculated from the stage 1 in this chronosequence. Arrows in this panel indicate the overall directions for the changes in clay+silt across stages.

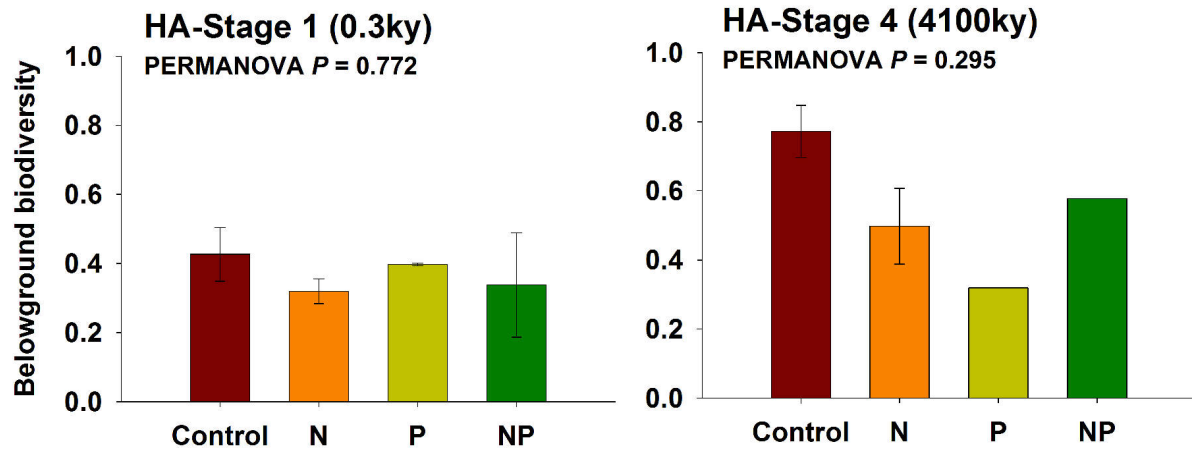

**Figure S28.** Mean ( $\pm$ SE) of belowground biodiversity in response to N, P and N+P additions in a 27 year experiment conducted over the youngest (0.3ky) and oldest (4100ky) soils from the chronosequence in HA ( $n = 3$ ). Details on the experimental design can be found in refs. 27 and 45. Belowground biodiversity is defined as the standardized average of the diversity of soil bacteria, fungi and invertebrates.

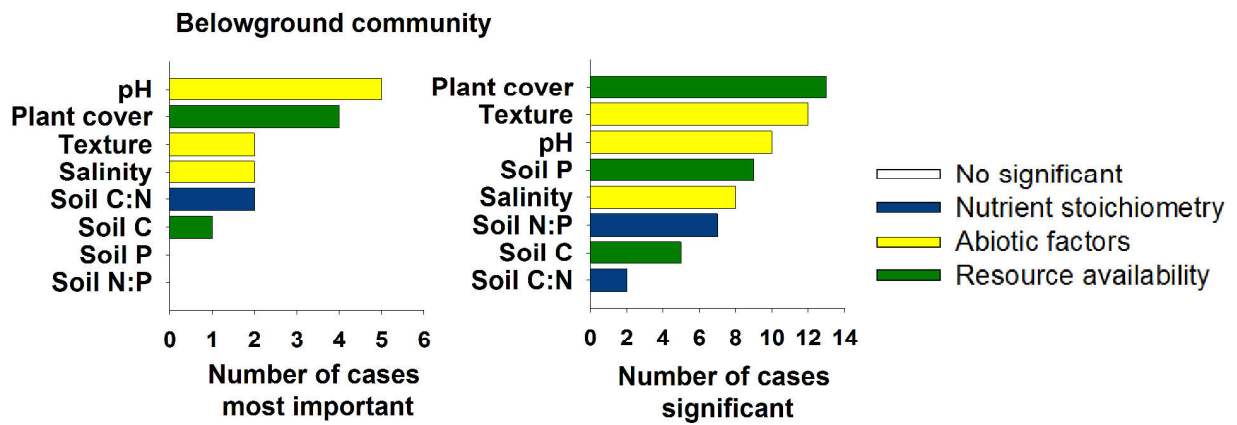

**Figure S29.** Summary for the most important predictors from Mantel test (Spearman) correlation of the community dissimilarity of belowground organisms, bacteria, fungi, protists and soil invertebrates across 16 globally distributed soil chronosequences. No bar = 0. See Extended Data Tables 12-13 for details.

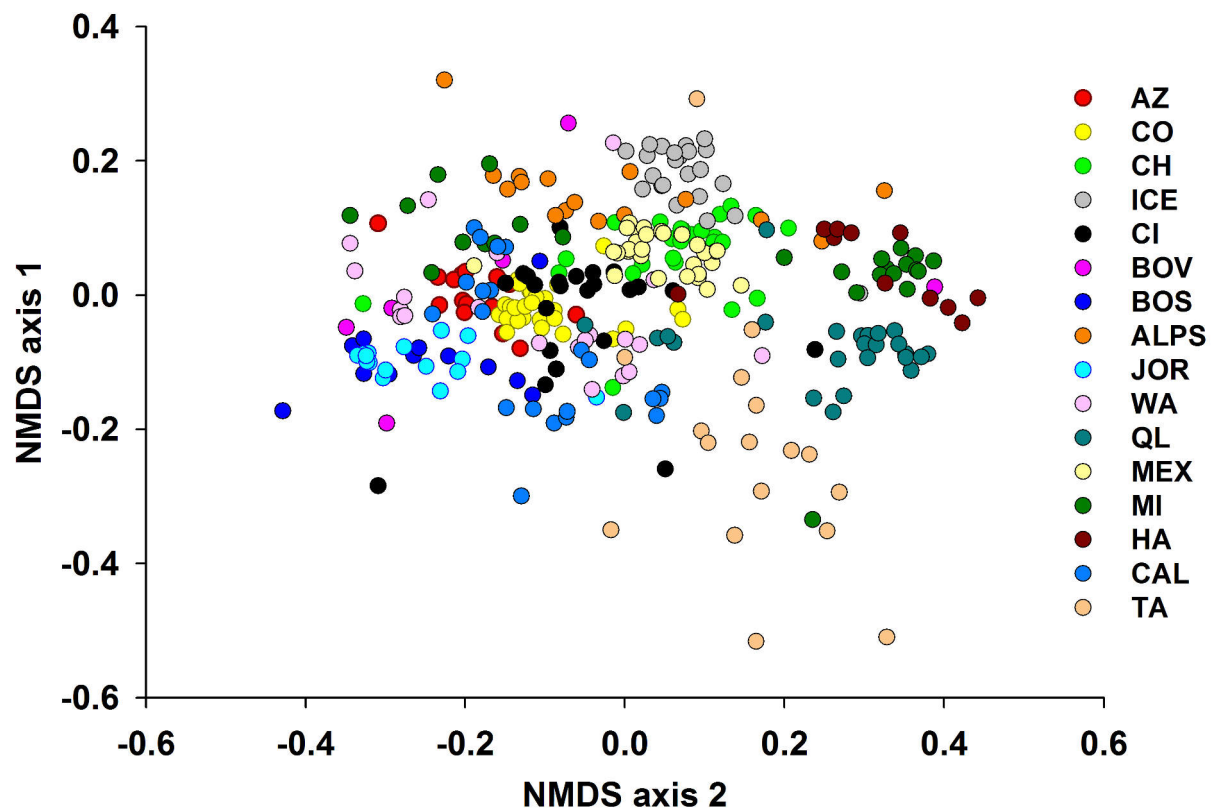

**Figure S30.** Nonmetric multidimensional scaling (NMDS) plots showing the belowground community composition across 16 soil chronosequences. Analyses are based on the averaged Bray-Curtis dissimilarity across samples for four matrices of distances (bacterial, fungal, protist and soil invertebrate communities). The number of samples included in this analysis is available in Appendix S1, Table S15.

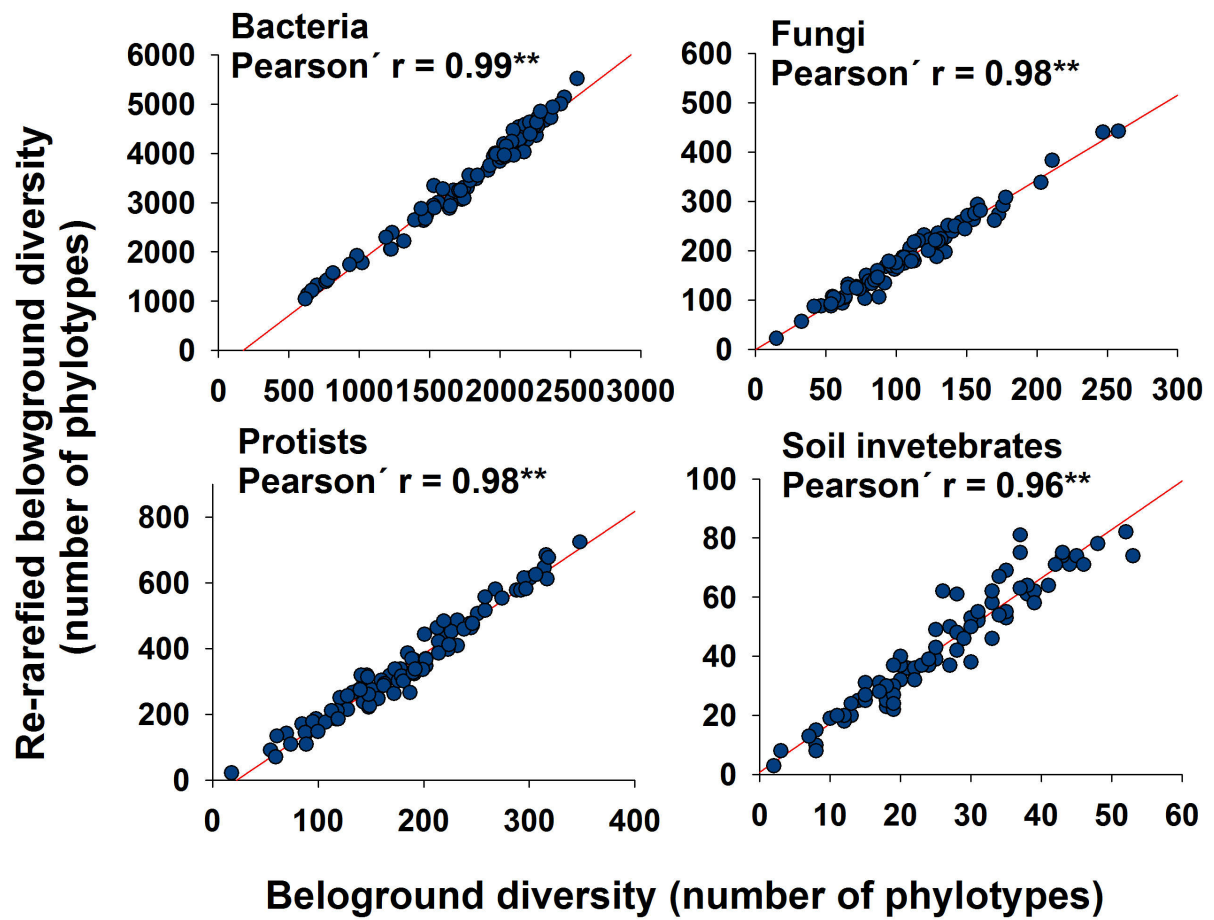

**Figure S31.** Relationships between diversity (number of phylotypes) of bacteria (rarefied at 5000 vs. 18000 sequences/sample), fungi (rarefied at 2000 vs. 10000 sequences/sample for fungi), protists (rarefied at 800 vs. 4000 sequences/sample) and soil invertebrates (rarefied at 300 vs. 1800 sequences/sample).

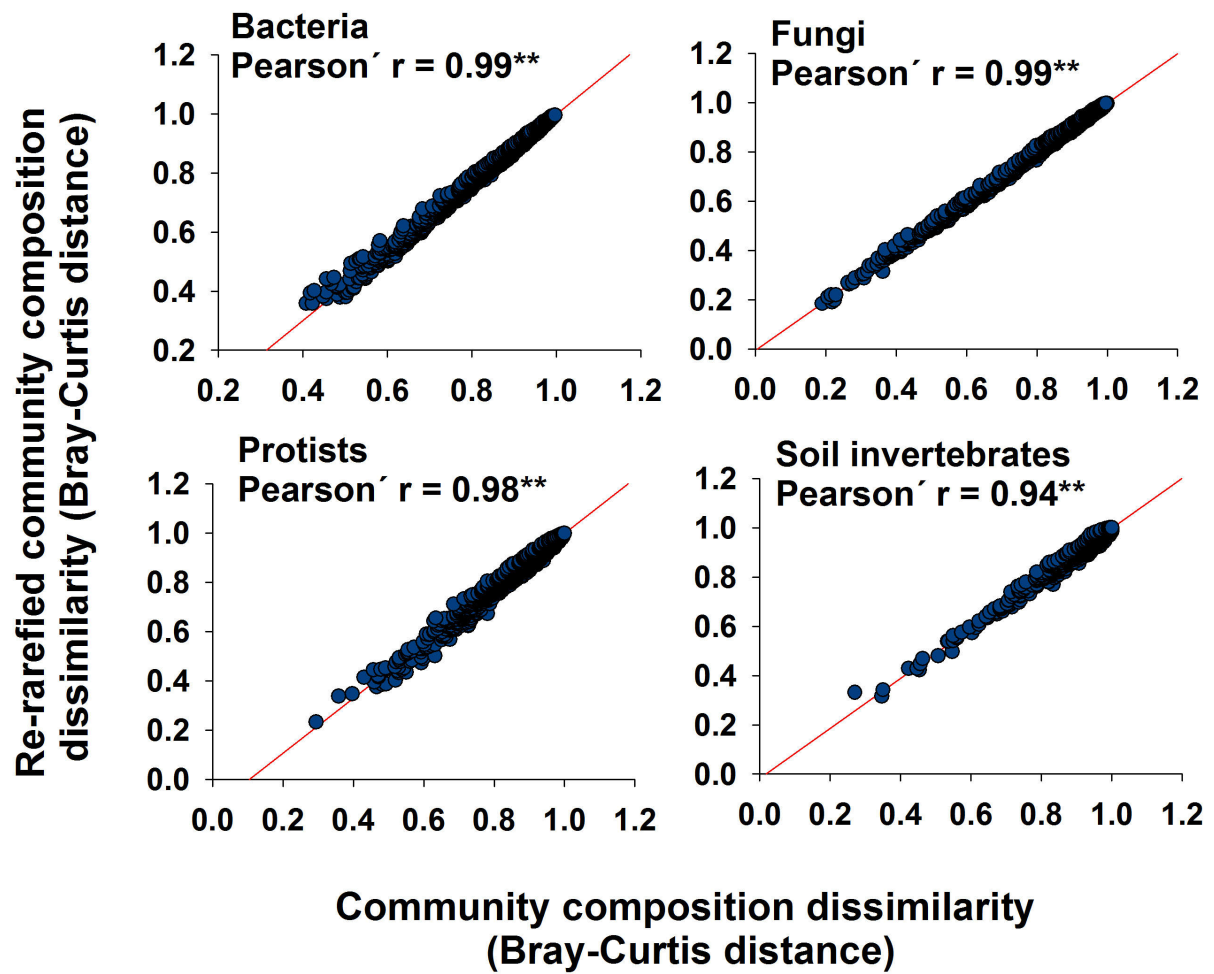

**Figure S32.** Mantel test correlation (Pearson) between community composition of bacteria (rarefied at 5000 vs. 18000 sequences/sample), fungi (rarefied at 2000 vs. 10000 sequences/sample for fungi), protists (rarefied at 800 vs. 4000 sequences/sample) and soil invertebrates (rarefied at 300 vs. 1800 sequences/sample).



## References

1. Delgado-Baquerizo, M. et al. (2018) A global atlas of the dominant bacteria found in soil. *Science* **19**, 320-325.
2. Bulgarelli, D. et al. (2012) Revealing structure and assembly cues for *Arabidopsis* root-inhabiting bacterial microbiota. *Nature* **488**, 91–95.
3. Maestre, F.T. et al. (2012) Plant Species Richness and Ecosystem Multifunctionality in Global Drylands. *Science* **335**, 214-218.
4. Cade, B.S. (1997) Comparison of Tree Basal Area and Canopy Cover in Habitat Models: Subalpine Forest. *J Wildl Manage* **61**, 326-335.
5. Wardle, D.A. et al. (2004) Ecosystem properties and forest decline in contrasting long-term chronosequences. *Science* **305**, 509-513.
6. Wardle, D.A. et al. (2009) Among- and within-species variation in plant litter decomposition in contrasting long-term chronosequences. *Funct. Ecol.* **23**, 442–453.
7. Maestre, F.T. et al. (2015) Increasing aridity reduces soil microbial diversity and abundance in global drylands. *Proc Natl Acad Sci U.S.A* **112**, 15684–15689.
8. Tedersoo, L. et al. (2014) Fungal biogeography. Global diversity and geography of soil fungi. *Science* **346**, 1256688.
9. Carini, P. et al. (2018) Unraveling the effects of spatial variability and relic DNA on the temporal dynamics of soil microbial communities. *bioRxiv* doi: <https://doi.org/10.1101/402438>.
10. Delgado-Baquerizo, M. et al. (2018) Plant attributes explain the distribution of soil microbial communities in two contrasting regions of the globe. *New Phytol.* **219**, 574-587.
11. Fierer, N., Jackson, R.B. (2006) The diversity and biogeography of soil bacterial communities. *Proc. Natl Acad. Sci. USA* **103**, 626–631.
12. Lauber, C.L. et al. (2009) Soil pH as a predictor of soil bacterial community structure at the continental scale: a pyrosequencing-based assessment. *Appl Environ Microbiol* **75**, 5111-5120.
13. Alfaro, F.D. et al. (2017) Microbial communities in soil chronosequences with distinct parent material: the effect of soil pH and litter quality. *Journal of Ecology* **105**, 1709-1722.
14. Wardle, D.A. et al. (2006) Ecological Linkages Between Aboveground and Belowground Biota. *Science* **304**, 1629-1633.
15. Vitousek, P. et al. (2010) Terrestrial phosphorus limitation: mechanisms, implications, and nitrogen-phosphorus interactions. *Ecol Appl.* **20**, 5–15.
16. Kettler, T.A. Doran, J.W., Gilbert, T.L. (2001) Simplified method for soil particle-size determination to accompany soil-quality analyses. *Soil Sci. Soc. Am. J.* **65**, 849.
17. Anderson, J. M., Ingram, J.S.I. (1993) Eds., *Tropical Soil Biology and Fertility: A Handbook of Methods* (CABI, Wallingford, UK, ed. 2).
18. Olsen, S.R., Sommers, L.E. (1982) in *Methods of Soil Analysis. Part 2. Chemical and Microbiological Properties*, A. L. Page, R. H. Miller, D. R. Keeney, Eds. (American Society of Agronomy and Soil Science Society of America, Madison, WI).
19. Ramirez K.S. et al. (2014) Biogeographic patterns in below-ground diversity in New York City's Central Park are similar to those observed globally. *Proc R Soc Lond B Biol Sci.* **281**, 1795.

20. Caporaso, J.G. et al. (2010) QIIME allows analysis of high-throughput community sequencing data. *Nat Method* **7**, 335.
21. Edgar, R.G. (2013) UPARSE: highly accurate OTU sequences from microbial amplicon reads. *Nature Methods* **10**, 996-998.
22. Edgar, R.C. (2016) UNOISE2: Improved error-correction for Illumina 16S and ITS amplicon reads. <http://dx.doi.org/10.1101/081257>
23. Soliveres, S. et al. (2016) Biodiversity at multiple trophic levels is needed for ecosystem multifunctionality. *Nature*. **25**, 456-9.
24. Wardle, D.A. et al. (2008) The response of plant diversity to ecosystem retrogression: evidence from contrasting long-term chronosequences. *Oikos* **117**, 93-103.
25. Laliberte, E. et al. (2013) How does pedogenesis drive plant diversity? *Trends in Ecology & Evolution* **28**, 6.
26. Laliberté, E., Zemunik, G., Turner, B.L. (2014) Environmental filtering explains variation in plant diversity along resource gradients. *Science* **345**, 1602-1605.
27. Vitousek, P.M. (2004) *Nutrient Cycling and Limitation: Hawai'i as a Model System* (Princeton University Press, New Jersey, NY).
28. Andersen, R. (2008) *Modern Methods for Robust Regression*. Sage University Paper Series on Quantitative Applications in the Social Sciences, 07-152.
29. Yegorov, O. (2016) Robust Fitting of Linear Model. R package version 1.2.
30. Burnham, K.P., Anderson, D.R. (2002) *Model Selection and Multimodel Inference: a Practical Information-Theoretic Approach* (Springer, New York, ed. 2).
31. Burnham, K.P., Anderson, D.R., Huyvaert, K.P. (2011) AIC model selection and multimodel inference in behavioral ecology: some background, observations, and comparisons. *Behav Ecol Sociobiol* **65**, 23–35.
32. Turner B.L. et al. (2018) A climosequence of chronosequences in southwestern Australia. *European Journal of Soil Science* **69**, 69-85
33. Barton, K. (2018) Multi-Model Inference R package version 1.40.4.
34. Delgado-Baquerizo, M. et al. (2015) Differences in thallus chemistry are related to species-specific effects of biocrust-forming lichens on soil nutrients and microbial communities. *Funct Ecol* **29**, 1087–1098.
35. Archer, E. (2016) rfPermute: Estimate Permutation p-Values for Random Forest Importance Metrics. R package version 1.5.2.
36. Anderson, M.J. (2001) A new method for non-parametric multivariate analysis of variance. *Austral Ecology* **26**, 32-46.
37. Hooper, D.U. et al. (2000) Interactions between aboveground and belowground biodiversity in terrestrial ecosystems: patterns, mechanisms, and feedbacks. *BioScience* **50**, 1049-1061
38. Waldrop, M.P. et al. (2006) Resource availability controls fungal diversity across a plant diversity gradient. *Ecology Letters* **9**, 1127–1135.
39. Jangid, K. et al. (2013). Progressive and retrogressive ecosystem development coincide with soil bacterial community change in a dune system under lowland temperate rainforest in New Zealand. *Plant Soil* **367**, 235–247.
40. Walker, T.W., Syers, J.K. The fate of phosphorus during pedogenesis. *Geoderma* **15**, 1–19 (1976).

41. Finzi, A.C. et al. (2011) Coupled biochemical cycles: Responses and feedbacks of coupled biogeochemical cycles to climate change: examples from terrestrial ecosystems. *Front. Ecol. Environ.* **9**, 61–67.
42. Robertson, G.P. & Groffman, P. (2007) *Soil microbiology and biochemistry* (Ecology Springer, New York).
43. Delgado-Baquerizo, M. et al. (2017) It is elemental: soil nutrient stoichiometry drives bacterial diversity. *Environmental Microbiology* **19**, 1176-1188.
44. Tripathi, B.M. et al. (2018) Soil pH mediates the balance between stochastic and deterministic assembly of bacteria. *ISME J.* **12**, 1072-1083.
45. Hobbie, S.E., P. Vitousek (2000) Nutrient limitation of decomposition in Hawaiian forests. *Ecology* **81**, 1765-2059.
